# Supplementary material for: Hallux valgus orthosis characteristics and effectiveness: a systematic review with meta-analysis
Source: PubMed Central journal article supplement — BMJ Open. 2021 Aug 18;11(8):e047273. doi: 10.1136/bmjopen-2020-047273 (PMC8375760; doi:10.1136/bmjopen-2020-047273), 2021-08-18
Supplement: bmjopen-2020-047273.draft_revisions.pdf [file bmjopen-2020-047273.draft_revisions.pdf]

# BMJ Open

BMJ Open is committed to open peer review. As part of this commitment we make the peer review history of every article we publish publicly available.

When an article is published we post the peer reviewers' comments and the authors' responses online. We also post the versions of the paper that were used during peer review. These are the versions that the peer review comments apply to.

The versions of the paper that follow are the versions that were submitted during the peer review process. They are not the versions of record or the final published versions. They should not be cited or distributed as the published version of this manuscript.

BMJ Open is an open access journal and the full, final, typeset and author-corrected version of record of the manuscript is available on our site with no access controls, subscription charges or pay-per-view fees (<http://bmjopen.bmj.com>).

If you have any questions on BMJ Open's open peer review process please email [info.bmjopen@bmj.com](mailto:info.bmjopen@bmj.com)

# BMJ Open

## Hallux Valgus Orthosis Characteristics and Effectiveness: A Systematic Review with Meta-analysis

|                               |                                                                                                                                                                                                                                                                                                                           |
|-------------------------------|---------------------------------------------------------------------------------------------------------------------------------------------------------------------------------------------------------------------------------------------------------------------------------------------------------------------------|
| Journal:                      | <i>BMJ Open</i>                                                                                                                                                                                                                                                                                                           |
| Manuscript ID                 | bmjopen-2020-047273                                                                                                                                                                                                                                                                                                       |
| Article Type:                 | Original research                                                                                                                                                                                                                                                                                                         |
| Date Submitted by the Author: | 23-Nov-2020                                                                                                                                                                                                                                                                                                               |
| Complete List of Authors:     | Kwan, Mei-Ying; The Hong Kong Polytechnic University Institute of Textiles and Clothing<br>Yick, Kit-Lun; The Hong Kong Polytechnic University,<br>Yip, Joanne; The Hong Kong Polytechnic University Institute of Textiles and Clothing<br>Tse, Chi-Yung; Centre for Orthopaedic Surgery                                  |
| Keywords:                     | Foot & ankle < ORTHOPAEDIC & TRAUMA SURGERY, Adult orthopaedics < ORTHOPAEDIC & TRAUMA SURGERY, Bone diseases < ORTHOPAEDIC & TRAUMA SURGERY, Health economics < HEALTH SERVICES ADMINISTRATION & MANAGEMENT, Quality in health care < HEALTH SERVICES ADMINISTRATION & MANAGEMENT, Anatomy < NATURAL SCIENCE DISCIPLINES |
|                               |                                                                                                                                                                                                                                                                                                                           |

SCHOLARONE™  
Manuscripts

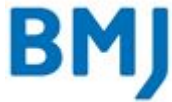

I, the Submitting Author has the right to grant and does grant on behalf of all authors of the Work (as defined in the below author licence), an exclusive licence and/or a non-exclusive licence for contributions from authors who are: i) UK Crown employees; ii) where BMJ has agreed a CC-BY licence shall apply, and/or iii) in accordance with the terms applicable for US Federal Government officers or employees acting as part of their official duties; on a worldwide, perpetual, irrevocable, royalty-free basis to BMJ Publishing Group Ltd ("BMJ") its licensees and where the relevant Journal is co-owned by BMJ to the co-owners of the Journal, to publish the Work in this journal and any other BMJ products and to exploit all rights, as set out in our [licence](#).

The Submitting Author accepts and understands that any supply made under these terms is made by BMJ to the Submitting Author unless you are acting as an employee on behalf of your employer or a postgraduate student of an affiliated institution which is paying any applicable article publishing charge ("APC") for Open Access articles. Where the Submitting Author wishes to make the Work available on an Open Access basis (and intends to pay the relevant APC), the terms of reuse of such Open Access shall be governed by a Creative Commons licence – details of these licences and which [Creative Commons](#) licence will apply to this Work are set out in our licence referred to above.

Other than as permitted in any relevant BMJ Author's Self Archiving Policies, I confirm this Work has not been accepted for publication elsewhere, is not being considered for publication elsewhere and does not duplicate material already published. I confirm all authors consent to publication of this Work and authorise the granting of this licence.

1  
2  
3  
4  
5 **Hallux Valgus Orthosis Characteristics and Effectiveness: A Systematic Review with Meta-analysis**  
6  
7  
8  
9  
10

11 Mei-Ying Kwan <sup>a</sup>, Kit-Lun Yick <sup>a\*</sup>, Joanne Yip <sup>a</sup>, Chi-Yung Tse <sup>b</sup>  
12  
13

14 <sup>a</sup> Institute of Textiles and Clothing, The Hong Kong Polytechnic University, Hong Kong  
15  
16

17 <sup>b</sup> Centre for Orthopaedic Surgery, Hong Kong  
18  
19

20 \* Correspondence: [tcyick@polyu.edu.hk](mailto:tcyick@polyu.edu.hk); Tel.: +852- 2766 6551  
21  
22  
23  
24  
25  
26  
27  
28  
29  
30  
31  
32  
33  
34  
35  
36  
37  
38  
39  
40  
41  
42  
43  
44  
45  
46  
47  
48  
49  
50  
51  
52  
53  
54  
55  
56  
57  
58  
59  
60

## Abstract

**Objective** The design of orthoses for hallux valgus (HV) involves multiple complex factors, and therefore a systematic analysis of their properties is necessary. The objective of this systematic review and meta-analysis is to determine whether current foot orthoses are effective in treating HV, and to investigate the associated orthosis characteristics.

**Design** Systematic review with meta-analysis.

**Data sources** Electronic databases (PubMed, Scopus, Cinahl and Medline) are searched to February 2020.

**Eligibility criteria for selecting studies** Cross sectional studies with content focus on HV orthosis design and any of the outcomes related to effectiveness for treating HV are included.

**Results** In total, 2066 articles are identified. Among them, 9 are selected and quality rated, and data are extracted and closely examined. A meta-analysis is conducted where appropriate. The results show that a full-length orthosis with a toe separator has the best effect of correcting the hallux valgus angle (HVA), with a reduction of 5.79° (SMD 0.85, CI 0.13, 1.54). Orthoses with a toe separator can significantly reduce foot pain (SMD 1.13, CI 0.34, 1.87). Both full-length (SMD 0.47, CI -0.10, 1.03) and 3/4-length (SMD 0.45, CI -0.12, 1.01) orthoses can significantly reduce the plantar pressure in HV patients.

**Conclusion** The full-length orthoses design with a toe separator or an element that allows for the foot anatomic alignment is critical for reducing the HVA and relieving foot pain.

## Strengths and limitations of this study

- This systematic review with meta-analysis represents, to the best of our knowledge, the most comprehensive examination of the evidence for the characteristics and effectiveness of orthosis in the treatment of hallux valgus.
- The results show that evidence is scarce and that very few studies have analyzed the characteristics and effectiveness of hallux valgus orthoses, and there is limited information on the materials of the orthotics studied.
- The results can highlight the design features and their relevance to HVA correction and pain relief.
- Future research should focus on the material properties of HV orthoses in order to provide effective solutions for the effective and optimal design of HV orthoses.

## 1 Introduction

2  
3  
4  
5 Hallux valgus (HV) is a common foot deformity, estimated to affect 23% of adults and 35.7% of the elderly  
6  
7  
8  
9 [1]. It is characterized by the hypermobility and pronation of the first metatarsal ray, which eventually lead  
10  
11  
12 to subluxation and pain of the first metatarsophalangeal joint [2]. The hallux valgus angle (HVA) is used  
13  
14  
15 as an indicator to objectively measure the degree of the deformity. An HVA  $\geq 15^\circ$  is a formal diagnosis of  
16  
17  
18 HV [3, 4]. The intermetatarsal angle (IMA) is another common measurement used to diagnose HV. An  
19  
20  
21 IMA  $< 9^\circ$  is considered to be a normal value, while  $9-17^\circ$  is mild to moderate, and  $\geq 18^\circ$  is severe [4]. HV is  
22  
23  
24 not only a prevalent and debilitating condition amongst the general public, especially women, due to  
25  
26  
27 hereditary or improper footwear but also a significant burden on public health care with the high demand  
28  
29  
30 for foot surgery [5], and its association with foot pain [6-9], which can inhibit the level of mobility and  
31  
32  
33 physical activity of those who suffer from the deformity [2]. This is especially devastating to athletes,  
34  
35  
36 who may acquire the condition due to prolonged periods of training. Previous research work has found  
37  
38  
39 that 9.3% of the Muay Thai kickboxers in their study suffer from HV [10-12]. Schöffl and Küpper [12] and  
40  
41  
42 Killian et al. [13] found that tight climbing shoes exert high pressure load on the forefoot which affects 53%  
43  
44  
45 of the long-term high-level climbers. Steinberg et al. [14] found that 40.0% dancers have bilateral HV and  
46  
47  
48 7.3 % have unilateral HV. Contributors to the development of HV include the individual body structure,  
49  
50  
51  
52  
53  
54  
55  
56  
57  
58  
59  
60

1 joint range of motion (ROM), anatomical abnormalities and extensive dance exercises that expose the  
2  
3  
4  
5 spine and the lower limb joints to high loads and strains [14-16]. Former ballet dancers (73.7%) were also  
6  
7  
8  
9 found to have a significantly higher HV incidence rate than the control group (2.6%) [15].  
10

11  
12  
13 Extreme cases of HV require surgical intervention, but the recurrence rate is high. Surgical operations  
14  
15  
16 may reduce the subsequent mobility of the big toe, and the impact on athletes can be devastating [2].  
17

18  
19 Hence, studies have shown that treatment of HV in athletes should be as conservative as possible [10]. The  
20  
21  
22 complications related to HV surgical correction such as nerve damage also discourage surgery [17-21].  
23

24  
25 Therefore, non-surgical conservative treatments such as the use of foot orthoses have become a viable and  
26  
27  
28 popular option for HV patients to correct their foot deformity and relieve foot pain [17, 22]. As described  
29  
30  
31 by Charrette [23], HV orthoses act as a means of biomechanical support to reduce the pressure on the first  
32  
33  
34 metatarsal joint which would prevent further degeneration of mobility.  
35

36  
37  
38 HV orthoses are available in a wide range of design features and materials. Ready-made and custom-made  
39  
40  
41 are the two main types of foot orthoses [24]. While the former are available online or in retail stores and  
42  
43  
44 made from standard patterns, the latter are constructed by using footprints or foot molds based on  
45  
46  
47 specifications of the clinician [25]. They may or may not have a toe separator, can have different lengths  
48  
49  
50 and made of different materials. The design of HV orthoses is multi-factorial, however, previous related  
51  
52  
53 studies have merely focused on the effectiveness of foot orthoses in HV patients. There has been very  
54  
55  
56 little work that systematically analyses the biomechanical parameters for the design of HV orthoses. The  
57  
58  
59 effects of different orthosis design features and material properties on foot support and control  
60



1 performance have not been fully reported in the field. A systematic review and meta-analysis should be  
2  
3  
4 carried out in a timely manner to determine available evidence on the outcomes of this conservative  
5  
6  
7 treatment through which practitioners can gain insights into how design decisions affect the performance  
8  
9  
10 of HV orthoses. This article conducts a systematic study to investigate the relationship between the  
11  
12  
13 elements and effectiveness of these orthoses, and quantitatively synthesizes the results based on the best  
14  
15  
16 available evidence. The results can provide reference for the clinical selection and future design trends of  
17  
18  
19 orthotics to achieve better treatment effects.  
20  
21  
22  
23  
24  
25  
26  
27  
28  
29  
30  
31  
32  
33  
34  
35  
36  
37  
38  
39  
40  
41  
42  
43  
44  
45  
46  
47  
48  
49  
50  
51  
52  
53  
54  
55  
56  
57  
58  
59  
60

For peer review only

## Methods

### *Search methods for identification of studies*

Research articles published in peer-reviewed journals that describe the construction of HV orthoses and/or their effectiveness were searched on PubMed, Scopus, Cinahl and Medline for all years available up to February 2020. A highly sensitive search strategy was used and is reported in Table I. The keywords include “hallux valgus”, “orthosis”, “design”, “fabrication”, “construction”, “pressure”, “gait”, “alignment”, “pain” and “walking speed”.

Table I List of search strategies

| Search strategy                                                                                                                               |
|-----------------------------------------------------------------------------------------------------------------------------------------------|
| 1. (“Hallux Valgus” AND (Design OR Fabrication OR Construction)) NOT (Implant OR Replacement)                                                 |
| 2. (“Hallux Valgus” AND (Orthoses OR Orthosis) AND (Design OR Fabrication OR Construction)) NOT (Implant OR Replacement)                      |
| 3. (“Hallux Valgus” AND (Orthoses OR Orthosis) AND Pressure) NOT (Implant OR Replacement)                                                     |
| 4. (“Hallux Valgus” AND (Orthoses OR Orthosis) AND Gait) NOT (Implant OR Replacement)                                                         |
| 5. (“Hallux Valgus” AND (Orthoses OR Orthosis) AND Alignment) NOT (Implant OR Replacement)                                                    |
| 6. (“Hallux Valgus” AND (Orthoses OR Orthosis) AND Pain) NOT (Implant OR Replacement)                                                         |
| 7. (“Hallux Valgus” AND (Orthoses OR Orthosis) AND “Walking speed”) NOT (Implant OR Replacement)                                              |
| 8. (“Hallux Valgus” AND (Orthoses OR Orthosis) AND (Design OR Fabrication OR Construction) AND Pressure) NOT (Implant OR Replacement)         |
| 9. (“Hallux Valgus” AND (Orthoses OR Orthosis) AND (Design OR Fabrication OR Construction) AND Gait) NOT (Implant OR Replacement)             |
| 10. (“Hallux Valgus” AND (Orthoses OR Orthosis) AND (Design OR Fabrication OR Construction) AND Alignment) NOT (Implant OR Replacement)       |
| 11. (“Hallux Valgus” AND (Orthoses OR Orthosis) AND (Design OR Fabrication OR Construction) AND Pain) NOT (Implant OR Replacement)            |
| 12. (“Hallux Valgus” AND (Orthoses OR Orthosis) AND (Design OR Fabrication OR Construction) AND “Walking speed”) NOT (Implant OR Replacement) |

### *Inclusion and exclusion criteria*

The titles and abstracts were then reviewed by 2 investigators. Full-text articles that assess HV orthosis designs or any of the outcomes related to the effectiveness of HV orthoses were then retrieved for detailed evaluation. The retrieved items were screened based on a two-stage selection process which subsequently considered the titles, abstracts, and full text. Assessment of the study eligibility was performed by one investigator.

### *Quality assessment and risk of bias*

The included papers were assessed for methodological quality. The title, journal name, and author details were removed to anonymize the articles prior to the rating process. Quality rating was performed by using the Epidemiological Appraisal Instrument (EAI) [26-29], which has been validated for the assessment of observational studies. Thirty-one items from the original EAI were used, after removing those that are related to interventions, randomization, the follow-up period, or loss to follow-up that are not applicable to cross-sectional studies. Items were scored as "No" or "Unable to determine" (score = 0), "Partial" (score = 1), "Yes" (score = 2), or "Not Applicable" (item removed from scoring process) and an average score across all items was calculated for each study.

## *Data management*

One investigator recorded the following details for all of the included papers: publication details (author, year, country, and study aim), sample characteristics (number of HV cases, number of control subjects, age and sex), study methodology (device, associated factors investigated, and orthosis wearing details) and result. The standardized mean differences (SMDs) and 95% confidence intervals (CIs) were calculated. To calculate the SMDs, the means and standard deviations (SDs) of pre-intervention and post-intervention [30], as well as the mean and SDs of the control and treatment groups were recorded [31]. The mean difference was divided by the pooled SD [32]. The SMDs are calculated with the following formulas:

$$1. \text{SMDs}_{\text{intervention}} = \frac{\text{Mean of pre-intervention} - \text{Mean of post-intervention}}{\text{Pooled SD for the entire population}}$$

$$2. \text{SMDs}_{\text{group}} = \frac{\text{Mean of treatment group} - \text{Mean of control group}}{\text{Pooled SD for the entire population}}$$

The interpretation of the SMDs was based on guidelines in previous studies: small effect  $\geq 0.2$ , medium effect  $\geq 0.5$ , and large effect  $\geq 0.8$  [29, 31, 33]. An SMD of "0" means that there is no difference in effect between the treatment and the control groups. SMDs that are " $> 0$ " or " $< 0$ " indicate that one group is more efficacious than the other, and vice versa. SMDs are usually accompanied by 95% CIs to evaluate the reliability of the comparison [29, 31, 34].

## *Patient and Public Involvement statement*

Patients and/or the public will not be involved in this study.

## Results

### *Search results*

The search strategy resulted in 2066 articles from PubMed, Scopus, Cinahl and Medline databases, with 1368 articles removed due to duplications. Then, the title and abstract of 698 articles were screened against the objective of the study, which resulted in the removal of 550 papers as they did not meet the requirements of the study design. The remaining 148 articles were assessed against the inclusion and exclusion criteria by examining the full text and were imported into the VOSviewer (version 1.6.13) to examine the trend of the results. Keywords with fewer than 3 occurrences were excluded, and general terms were filtered out so that the focus would be on more specific and informative terms [35]. Figure I(a) visualizes the results that amongst the 148 remaining articles, 18 keywords meet the threshold. The total link strength ranged from 26 to 71, with larger label denoting a higher total link strength. On average, the publication years of the articles ranged from 2010 to 2015, in which “male”, “patient satisfaction”, “foot orthoses” and “hallux valgus-therapy” are the latest research terms. After the assessment, another 89 articles were removed. The remaining 9 studies are discussed in this systematic review. Figure I(b) presents a PRISMA flow chart of the article selection process.

1  
2 **Figure I (a) Visualization of main keywords from 148 papers, and (b) Flowchart of study selection**  
3 **procedure**  
4  
5  
6  
7

8 *Study characteristics*  
9  
10  
11

12 The 9 studies selected for inclusion in this paper focused on various characteristics and included different  
13 demographics (Table II). The publication years of these papers range from 2002 to 2020. The studies  
14 evaluated the effects of 11 different types of HV orthoses on angle correction (IMA and HVA), plantar  
15 pressure, ROM, pain (Visual Analogue Scale (VAS) and Foot and Ankle Outcome Score (FAOS) -pain),  
16 function during daily activities (the American Orthopedic Foot and Ankle Score (AOFAS) and FAOS -  
17 function) and quality of life (Health-related quality of life index and FAOS -quality of life). The number of  
18 subjects who suffer from HV ranged from 16 to 69, with mild to moderate HV. Four of the studies involved  
19 control groups with 23 to 69 participants. Overall, the majority of the subjects are female.  
20  
21  
22  
23  
24  
25  
26  
27  
28  
29  
30  
31  
32  
33  
34  
35  
36  
37  
38  
39  
40  
41  
42  
43  
44  
45  
46  
47  
48  
49  
50  
51  
52  
53  
54  
55  
56  
57  
58  
59  
60

Table II Selected characteristics of studies included in analysis (9 unique studies)

| Authors(s)/<br>Country                              | Reference<br>No. | Study aim                                                                                                                       | Method/<br>Device                                                               | N<br>HV/<br>control | N<br>male/<br>female | Age<br>(Mean ± SD)                                       | Orthosis                                                              | Orthosis material/<br>Wearing duration                                          | Result                                                                                                                                                                                            |
|-----------------------------------------------------|------------------|---------------------------------------------------------------------------------------------------------------------------------|---------------------------------------------------------------------------------|---------------------|----------------------|----------------------------------------------------------|-----------------------------------------------------------------------|---------------------------------------------------------------------------------|---------------------------------------------------------------------------------------------------------------------------------------------------------------------------------------------------|
| Chadchavalpa<br>nichaya et al.<br>2018/<br>Thailand | [36]             | To investigate the effect of custom-molded room temperature vulcanizing (RTV) silicone toe separator to reduce HVA              | Prospective randomized trial/<br>Radiographic measurement & clinical assessment | 45/45               | 5/85                 | HV group:<br>60.3 ± 9.4<br>Control group:<br>60.8 ± 10.8 | Custom-molded RTV toe separator                                       | Silicone/ 12 months                                                             | Both groups have significant differences in mean HVA with a decrease of 3.3° ± 2.4° for the study group and increase of 1.9° ± 1.9° for the control group. Hallux pain of study group is reduced. |
| Doty et al.<br>2015/ USA                            | [37]             | To compare the plantar pressure distribution in standard footwear and in the same footwear with orthoses of 3 different lengths | Case-control/<br>Tactilus Free Form® Sensor System                              | 25/0                | 2/23                 | Mean: 57                                                 | Full-length orthosis<br>Sulcus-length orthosis<br>3/4-length orthosis | NR/ Immediate                                                                   | No significant changes in medial pressure with the addition of any orthosis compared with standard footwear alone                                                                                 |
| Farzadi et al.<br>2015/ Iran                        | [22]             | To investigate the effect of orthosis with medial arch support on plantar pressure distribution                                 | Quasi-experimental/<br>Pedar-X® in-shoe system                                  | 16/0                | 0/16                 | 26.1 ± 5.7                                               | Prefabricated arch support foot orthosis                              | 5 mm thick polypropylene/ 1 month                                               | The use of the foot orthosis leads to a decrease in peak pressure & maximum force                                                                                                                 |
| Moulodi et al.<br>2019/ Iran                        | [38]             | To compare the HVA, ROM, FAOS, pain & function in daily activities after the use of orthosis                                    | Case-control;<br>clinical examination/<br>Goniometer                            | 24/0                | 12/12                | 22.79 ± 1.44                                             | Static orthosis with toe separator<br>Dynamic orthosis                | A bar & a single strap/ 1 month<br>Firm plastic, straps & a free joint/ 1 month | Both orthoses can reduce HVA up to 2–3°; significant difference in ROM by using dynamic orthosis                                                                                                  |

Table II Continued

| Author(s)/ Reference                | N              | N               | Age         | Orthosis                      | Orthosis material/<br>Wearing duration                      | Result                                                                                                                                                                            |
|-------------------------------------|----------------|-----------------|-------------|-------------------------------|-------------------------------------------------------------|-----------------------------------------------------------------------------------------------------------------------------------------------------------------------------------|
| Country                             | HV/<br>control | male/<br>female | (Mean ± SD) |                               |                                                             |                                                                                                                                                                                   |
| Plaass et al.<br>2020/<br>Germany   | [39]           | 36/34           | 4/66        | 53.2 ± 14.0<br>48.5 ± 12.9    | Dynamic<br>orthosis                                         | Dynamic orthosis<br>can provide pain<br>relief in patients but<br>showed no effect on<br>HVA                                                                                      |
| Reina et al.<br>2013/ Spain         | [40]           | 23/23           | 0/54        | 30.31 ± 9.27<br>30.94 ± 14.06 | Custom-made<br>foot orthoses                                | Custom-made<br>orthoses appear to<br>have no effect                                                                                                                               |
| Tang et al.<br>2002/<br>Taiwan      | [41]           | 17/0            | 0/17        | 42.59 ± 16.52                 | Total contact<br>orthosis with toe<br>separator             | The new total<br>contact orthosis with<br>fixed toe separator<br>reduces HVA                                                                                                      |
| Tehraninasr<br>et al. 2008/<br>Iran | [42]           | 30/0            | 0/30        | 27 ± 8.91                     | Orthosis with<br>toe separator<br><br>Nighttime<br>orthosis | IMA & HVA are<br>reduced in both<br>groups; however,<br>the reduction is not<br>significant; the<br>orthosis with toe<br>separator<br>significantly reduces<br>the pain intensity |
| Torkki et al.<br>2003/<br>Finland   | [43]           | 69/69           | 8/61        | 49 ± 10<br>47 ± 9             | NR                                                          | Orthoses provide<br>short-term<br>symptomatic relief                                                                                                                              |



1 *Quality assessment and risk of bias*

2  
3  
4  
5 The inter-rater agreement on the EAI is 95% (14 disagreements out of 279 quality assessment items rated)

6  
7  
8 across all included studies (9 papers). The individual study results for quality appraisal are shown in Table

9  
10  
11 III. All of the studies defined the associated factors investigated and reported the sampling frame and

12  
13  
14 statistical methods (9/9, 100%). Most studies clearly reported their aims and study design (8/9, 89%). More

15  
16  
17 than half of the studies reported the inclusion criteria, sample characteristics, sample size calculations and

18  
19  
20 statistical parameters (7/9, 78%; 6/9, 67%; 7/9, 78%; and 7/9, 78%, respectively). Few studies reported an

21  
22  
23 attempt to blind the assessors towards the group allocation (1/4, 25%), although given the nature of HV

24  
25  
26 deformities, blinding assessors is unlikely to be possible in most studies. No study fully considered

27  
28  
29 confounding factors such as age and sex by using statistical adjustment techniques or comparing the case

30  
31  
32 and control groups.

33  
34  
35  
36 Reliability and validity were considered separately for both the HV assessment and measurement of the

37  
38  
39 associated factors. Only a couple of the studies (2/9; 22%) provided a clear definition of HV by reporting

40  
41  
42 angle values, another couple of studies (2/9; 22%) reported the reliability for the HV angle assessment, and

43  
44  
45 only 11% (1/9) reported the validity of the HV assessment.

Table III Results of quality assessment of all included papers (9 unique studies)<sup>a</sup>

| Author(s)                                          | Chadchavalpa<br>nichaya et al.<br>2018 | Doty et<br>al. 2015 | Farzadi<br>et al.<br>2015 | Moulodi<br>et al. 2019 | Plaass et<br>al. 2020 | Reina<br>et al.<br>2013 | Tang et<br>al. 2002 | Tehraninasr<br>et al. 2008 | Torkki<br>et al.<br>2003 | Studies<br>scoring<br>"Yes" (%) |
|----------------------------------------------------|----------------------------------------|---------------------|---------------------------|------------------------|-----------------------|-------------------------|---------------------|----------------------------|--------------------------|---------------------------------|
| Reference No.                                      | [36]                                   | [37]                | [22]                      | [38]                   | [39]                  | [40]                    | [41]                | [42]                       | [43]                     |                                 |
| Q1. Reported study<br>aim/objective clearly        | Yes                                    | Yes                 | Yes                       | Yes                    | Yes                   | Yes                     | Yes                 | Yes                        | Partial                  | 89                              |
| Q2. Associated factors clearly<br>defined          | Yes                                    | Yes                 | Yes                       | Yes                    | Yes                   | Yes                     | Yes                 | Yes                        | Yes                      | 100                             |
| Q3. HV clearly defined                             | Partial                                | Yes                 | Partial                   | No                     | No                    | No                      | No                  | Yes                        | No                       | 22                              |
| Q4. Reported study design                          | Yes                                    | Yes                 | Yes                       | Yes                    | Yes                   | Yes                     | Yes                 | Partial                    | Yes                      | 89                              |
| Q5. Reported sampling<br>frame                     | Yes                                    | Yes                 | Yes                       | Yes                    | Yes                   | Yes                     | Yes                 | Yes                        | Yes                      | 100                             |
| Q6. Reported inclusion<br>criteria                 | Yes                                    | No                  | Yes                       | Yes                    | Yes                   | Yes                     | Yes                 | Yes                        | No                       | 78                              |
| Q7. Reported participation<br>rate                 | Yes                                    | No                  | Yes                       | Yes                    | Partial               | Yes                     | Partial             | No                         | Yes                      | 44                              |
| Q8. Reported sample<br>characteristics             | Yes                                    | Yes                 | Partial                   | Partial                | Yes                   | Yes                     | Yes                 | Partial                    | Yes                      | 67                              |
| Q9. Reported statistical<br>methods                | Yes                                    | Yes                 | Yes                       | Yes                    | Yes                   | Yes                     | Yes                 | Yes                        | Yes                      | 100                             |
| Q10. Reported all basic data                       | No                                     | No                  | No                        | No                     | No                    | No                      | Yes                 | No                         | No                       | 11                              |
| Q11. Reported variability in<br>data               | Yes                                    | No                  | Yes                       | Yes                    | Yes                   | Yes                     | No                  | Yes                        | Yes                      | 78                              |
| Q12. Reported statistical<br>parameters            | Yes                                    | Yes                 | Yes                       | Yes                    | Yes                   | Yes                     | Partial             | Partial                    | Yes                      | 78                              |
| Q13. Sample size calculations                      | Yes                                    | Partial             | Yes                       | Yes                    | Yes                   | Yes                     | Partial             | Yes                        | Yes                      | 78                              |
| Q14. Comparability of<br>case/control groups       | Yes                                    | -                   | -                         | -                      | Yes                   | Yes                     | -                   | -                          | Yes                      | 100                             |
| Q15. Adequate participation<br>rate                | Yes                                    | Yes                 | Yes                       | Yes                    | Yes                   | Yes                     | Yes                 | Yes                        | Yes                      | 100                             |
| Q16. Recruitment period for<br>case/control groups | Yes                                    | -                   | -                         | -                      | Yes                   | Yes                     | -                   | -                          | No                       | 75                              |
| Q17. Non-responder<br>characteristics described    | No                                     | No                  | No                        | No                     | No                    | No                      | No                  | No                         | No                       | 0                               |
| Q18. Reliability of all<br>associated factors      | Yes                                    | No                  | Partial                   | Yes                    | No                    | No                      | No                  | No                         | No                       | 22                              |

<sup>a</sup> Purple shading = "Yes", Blue shading = "Partial", White shading = "No" or "Unable to determine", "-" = "Not applicable"; that is, items removed from scoring process and not included in % calculations.

Table III Continued <sup>a</sup>

| Author(s)                                                                 | Chadchavalpa<br>nichaya et al.<br>2018 | Doty et<br>al. 2015 | Farzadi et<br>al. 2015 | Moulodi<br>et al. 2019 | Plaass<br>et al.<br>2020 | Reina et<br>al. 2013 | Tang<br>et al.<br>2002 | Tehraninasr<br>et al. 2008 | Torkki<br>et al.<br>2003 | Studies<br>scoring "Yes"<br>(%) |
|---------------------------------------------------------------------------|----------------------------------------|---------------------|------------------------|------------------------|--------------------------|----------------------|------------------------|----------------------------|--------------------------|---------------------------------|
| Reference No.                                                             | [36]                                   | [37]                | [22]                   | [38]                   | [39]                     | [40]                 | [41]                   | [42]                       | [43]                     |                                 |
| Q19. Validity of all associated factors                                   |                                        |                     |                        |                        |                          |                      |                        |                            |                          | 11                              |
| Q20. Standardized assessment of associated factors                        |                                        |                     |                        |                        |                          |                      |                        |                            |                          | 100                             |
| Q21. Blinding of assessors                                                |                                        | -                   | -                      | -                      |                          |                      | -                      | -                          |                          | 25                              |
| Q22. Reliability of HV assessment                                         |                                        |                     |                        |                        |                          |                      |                        |                            |                          | 22                              |
| Q23. Validity of HV assessment                                            |                                        |                     |                        |                        |                          |                      |                        |                            |                          | 11                              |
| Q24. Standardized assessment of HV                                        |                                        |                     |                        |                        |                          |                      |                        |                            |                          | 56                              |
| Q25. Assessment period for case/control groups                            |                                        | -                   | -                      | -                      |                          |                      | -                      | -                          |                          | 100                             |
| Q26. Collected data on HV severity/symptoms                               |                                        |                     |                        |                        |                          |                      |                        |                            |                          | 22                              |
| Q27. Adjusted for covariates (sex and age)                                |                                        |                     |                        |                        |                          |                      |                        |                            |                          | 0                               |
| Q28. Reported data for ≥ 3 levels of associated factors                   |                                        |                     |                        |                        |                          |                      |                        |                            |                          | 2                               |
| Q29. Reported data for subgroups of subjects (e.g. by sex or age)         |                                        |                     |                        |                        |                          |                      |                        |                            |                          | 0                               |
| Q30. Generalizability of results to study population (participation rate) |                                        |                     |                        |                        |                          |                      |                        |                            |                          | 0                               |
| Q31. Generalizability of results to other populations (random sampling)   |                                        |                     |                        |                        |                          |                      |                        |                            |                          | 44                              |
| Overall quality score (range 0 to 2)                                      | 1.45                                   | 0.89                | 0.93                   | 1.22                   | 1.23                     | 1.13                 | 0.96                   | 1.07                       | 1.06                     |                                 |

<sup>a</sup> Purple shading = "Yes", Blue shading = "Partial", White shading = "No" or "Unable to determine", "-" = "Not applicable"; that is, items removed from scoring process and not included in % calculations.

## Overview of results from meta-analyses

Table IV provides the SMDs for individual studies in which 10 measurement factors before and after intervention in the HV group are compared. Six of the studies investigated the HVA. Tang et al. [41] stated that their full-length orthosis with a toe separator provides a significantly positive reduction of the HVA of 5.79° in the HV group (SMD 0.85, CI 0.13,1.54), which has the highest corrective effect among all the recorded orthoses. The static orthosis with a toe separator tested by Moulodi et al. [38] also showed a significant positive HVA correction of 2.67° in the HV group (SMD 0.75, CI 0.15,1.32). The dynamic orthosis tested also showed a significantly positive reduction of the HVA of 2.13° (SMD 0.55, CI -0.03,1.12) [38]. Chadchavalpanichaya et al. [36] developed a custom-molded RTV toe separator, which helps to correct the HVA by 2.1° in the HV group (SMD 0.41, CI -0.01,0.83). Two other studies, Plaass et al. [39] and Reina et al. [40], investigated the impact of the orthosis in terms of the IMA, but neither showed any significant results.

Three of the studies investigated the pain score with the use of two different types of rating scales. One of them, Tehraninasr et al. [42], showed that their orthosis with a toe separator can significantly reduce the pain level (SMD 1.13, CI 0.34,1.87). With the use of the VAS, Torkki et al. [43] also found that their orthosis can help to reduce pain (SMD 0.38, CI 0.04,0.72), however, they did not provide a description of the orthosis. The dynamic orthosis in Moulodi et al. [38] showed a positive impact on releasing pain (SMD -0.27, CI -0.83,0.31). The FAOS for pain is reduced by 4.28.

The quality of life and level of physical functioning before and after the application of an orthosis have also been compared. The orthosis in Torkki et al. [43] showed a positive effect based on the health-related

1 quality of life index (SMD -0.31, CI -0.64,0.03), with an increase of the score by 2. The static orthosis with a  
2  
3  
4 toe separator and the dynamic orthosis tested by Moulodi et al. [38] showed a significantly positive FAOS  
5  
6  
7 for function with an increase of 6.25 and 4.51 points, respectively (static orthosis: SMD -0.36, CI -0.93,0.21;  
8  
9  
10 dynamic orthosis: SMD -0.25, CI -0.81,0.33).

14 The effects of foot orthoses on changes in the ROM have also been examined in the studies of concern.

17 The dynamic orthosis tested by Moulodi et al. [38] showed a significant improvement in ROM with an  
18  
19  
20 increase of 9.77° (SMD -0.52, CI -1.08,0.07). Two other studies investigated the impact of the foot orthosis  
21  
22  
23 on plantar pressure. Farzadi et al. [22] found that the prefabricated full-length arch support orthosis can  
24  
25  
26 significantly reduce the plantar pressure by 16.8 kPa (SMD 0.65, CI -0.08,1.34). Doty et al. [37] pointed out  
27  
28  
29 that the full-length and the 3/4-length orthoses result in a significant reduction of plantar pressure of 11.82  
30  
31  
32 kPa and 10.37 kPa among HV patients, respectively (full-length orthosis: SMD 0.47, CI -0.10,1.03; 3/4-  
33  
34  
35 length orthosis: SMD 0.45, CI -0.12,1.01).

39 Table V provides the SMDs from five studies, which compare 4 measurement factors between the  
40  
41  
42 treatment and the control groups. The treatment group which was prescribed the custom-molded RTV  
43  
44  
45 silicone toe separator for 12 months showed a significant effect in reducing the HVA (SMD -0.46, CI -5,-  
46  
47  
48 0.23) [36]. The dynamic orthosis (halluxsan, Albrecht GmbH, Stephan-skirchen, Germany) worn by the  
49  
50  
51 treatment group can reduce both the HVA (SMD -0.22, CI -6.3,2.34) and IMA (SMD -0.22, CI -2.3,0.85) [39].  
52  
53  
54 The customized orthosis developed by Reina et al. [40] also provided improvement in IMA (SMD -0.28, CI -  
55  
56  
57 1.8,0.67).

1  
2  
3  
4  
5 *Observation of key design features*  
6  
7  
8

9 ***Customized vs. prefabricated***  
10  
11  
12

13 Among the orthoses that showed a significant reduction of the HVA after treatment amongst the HV  
14 patients, the orthoses developed by Chadchavalpanichaya et al. [36] and Tang et al. [41] are custom-made,  
15 while those in Moulodi et al. [38], Tehraninasr et al. [42], Torkki et al. [43], Doty et al. [37] and Farzadi et al.  
16 [22] are prefabricated. When comparing the treatment and control groups, the orthoses discussed by  
17 Chadchavalpanichaya et al. [36] and Reina et al. [40] are custom-made, while the orthosis in Plaass et al.  
18 [39] is prefabricated. This shows that the ability of an orthosis to reduce the severity of HV or its treatment  
19 effectiveness might not be related to whether it is customized or prefabricated. However, adjustment and  
20 fitting are still key factors, and patients are instructed to adjust the prefabricated orthosis to the best  
21 fitting position [39].  
22  
23  
24  
25  
26  
27  
28  
29  
30  
31  
32  
33  
34  
35  
36  
37  
38  
39  
40

41 ***Static vs. dynamic***  
42  
43  
44

45 When comparing the treatment group and the control group, the use of both static and dynamic orthoses  
46 showed significant reductions of HV symptoms, and all of the static orthoses have a toe separator [36, 39].  
47  
48 In terms of HVA reduction, the results are consistent with those of the HV patients before and after the  
49 intervention. Both types of orthoses have a positive effect on treatment effectiveness, whilst all of the  
50  
51  
52  
53  
54  
55  
56  
57  
58  
59  
60

1 static orthoses that help to reduce the HVA are embedded with the feature of toe separator. Therefore,  
2  
3  
4 the toe separator seems to be the key element in correcting the misalignment of the big toe.  
5  
6  
7

### 8 ***Considerations around orthosis length and arch support*** 9

10  
11  
12 In terms of the orthosis length, the full-length orthosis in Tang et al. [41] has a significant and exceptional  
13  
14  
15 corrective effect of HV in the HV group. The full-length orthoses in Farzadi et al. [22] and Doty et al. [37]  
16  
17  
18 can significantly reduce the plantar pressure. These results show that when considering the length of the  
19  
20  
21 orthosis for HV patients, full-length is preferred. Among these orthoses, only the orthosis tested by Farzadi  
22  
23  
24 et al. [22] provides arch support. It is anticipated that arch support may not be a mandatory design  
25  
26  
27 feature to achieve therapeutic effects.  
28  
29  
30  
31  
32  
33  
34  
35  
36  
37  
38  
39  
40  
41  
42  
43  
44  
45  
46  
47  
48  
49  
50  
51  
52  
53  
54  
55  
56  
57  
58  
59  
60

Table IV Comparison of observations between pre- and post-interventions <sup>a</sup>

| Parameter                            | Author(s)                       | Reference No. | Orthosis type                           | Pre-intervention |    | Post-intervention |       | Pooled |       | Mean  | SMDs  | 95% CIs    |       |       |
|--------------------------------------|---------------------------------|---------------|-----------------------------------------|------------------|----|-------------------|-------|--------|-------|-------|-------|------------|-------|-------|
|                                      |                                 |               |                                         | Mean             | n  | SD                | Mean  | n      | SD    | SD    |       | Difference | Lower | Upper |
|                                      |                                 |               |                                         |                  |    |                   |       |        |       |       |       |            |       |       |
| HVA                                  | Chadchavalpanichaya et al. 2018 | [36]          | Custom-molded RTV toe separator         | 32.5             | 45 | 4.8               | 30.4  | 45     | 5.4   | 5.11  | 2.1   | 0.41       | -0.01 | 0.83  |
|                                      | Moulodi et al. 2019             | [38]          | Static orthosis with toe separator      | 18.21            | 24 | 3.41              | 15.54 | 24     | 3.74  | 3.58  | 2.67  | 0.75       | 0.15  | 1.32  |
|                                      | Moulodi et al. 2019             | [38]          | Dynamic orthosis                        | 17.96            | 24 | 3.75              | 15.83 | 24     | 3.94  | 3.85  | 2.13  | 0.55       | -0.03 | 1.12  |
|                                      | Plaass et al. 2020              | [39]          | Dynamic orthosis                        | 35.4             | 36 | 8.6               | 34.9  | 36     | 9.2   | 8.91  | 0.5   | 0.06       | -0.41 | 0.52  |
|                                      | Reina et al. 2013               | [40]          | Custom-made foot orthoses               | 20.55            | 23 | 5.1               | 21.02 | 23     | 5.14  | 5.12  | -0.47 | -0.09      | -0.67 | 0.49  |
|                                      | Tang et al. 2002                | [41]          | Full-length orthosis with toe separator | 31.04            | 17 | 6.4               | 25.25 | 17     | 7.14  | 6.78  | 5.79  | 0.85       | 0.13  | 1.54  |
|                                      | Tehraninasr et al. 2008         | [42]          | Orthosis with toe separator             | 25.46            | 15 | 3.68              | 25.36 | 15     | 3.68  | 3.68  | 0.1   | 0.03       | -0.69 | 0.74  |
|                                      | Tehraninasr et al. 2008         | [42]          | Nighttime orthosis                      | 24.13            | 15 | 2.05              | 24.16 | 15     | 2.09  | 2.07  | -0.03 | -0.01      | -0.73 | 0.702 |
| IMA                                  | Plaass et al. 2020              | [39]          | Dynamic orthosis                        | 15.4             | 36 | 3                 | 15.2  | 36     | 3.1   | 3.05  | 0.20  | 0.07       | -0.40 | 0.53  |
|                                      | Reina et al. 2013               | [40]          | Custom-made foot orthoses               | 10.86            | 23 | 2.33              | 11.1  | 23     | 2.34  | 2.34  | -0.24 | -0.10      | -0.68 | 0.48  |
| FAOS-pain                            | Moulodi et al. 2019             | [38]          | Static orthosis with toe separator      | 85.28            | 24 | 12.24             | 87.49 | 24     | 12.29 | 12.27 | -2.21 | -0.18      | -0.74 | 0.39  |
|                                      | Moulodi et al. 2019             | [38]          | Dynamic orthosis                        | 81.61            | 24 | 17.41             | 85.89 | 24     | 14.5  | 16.02 | -4.28 | -0.27      | -0.83 | 0.31  |
| Foot pain VAS                        | Tehraninasr et al. 2008         | [42]          | Orthosis with toe separator             | 4.26             | 15 | 1.48              | 2.66  | 15     | 1.34  | 1.41  | 1.6   | 1.13       | 0.34  | 1.87  |
|                                      | Tehraninasr et al. 2008         | [42]          | Nighttime orthosis                      | 4.13             | 15 | 1.78              | 4     | 15     | 1.13  | 1.49  | 0.13  | 0.087      | -0.63 | 0.80  |
|                                      | Torkki et al. 2003              | [43]          | NR                                      | 50               | 69 | 24                | 41    | 69     | 23    | 23.51 | 9     | 0.38       | 0.04  | 0.72  |
| Health-related quality of life index | Torkki et al. 2003              | [43]          | NR                                      | 91               | 69 | 6.9               | 93    | 69     | 6.1   | 6.51  | -2.00 | -0.31      | -0.64 | 0.03  |

<sup>a</sup> SMDs ≥ 0.2 or ≤ -0.2 are highlighted in yellow; SMDs ≥ 0.5 or ≤ -0.5 are in orange, SMDs ≥ 0.8 or ≤ -0.8 are in green



Table IV Continued <sup>a</sup>

| Parameter            | Author(s)           | Reference No. | Orthosis type                                             | Pre-intervention |    |       | Post-intervention |    |       | Pooled SD | Mean Difference | SMDs  | 95% CIs |       |
|----------------------|---------------------|---------------|-----------------------------------------------------------|------------------|----|-------|-------------------|----|-------|-----------|-----------------|-------|---------|-------|
|                      |                     |               |                                                           | Mean             | n  | SD    | Mean              | n  | SD    |           |                 |       | Lower   | Upper |
|                      |                     |               |                                                           |                  |    |       |                   |    |       |           |                 |       |         |       |
| FAOS-Quality of life | Moulodi et al. 2019 | [38]          | Static orthosis with toe separator                        | 66.14            | 24 | 16.68 | 67.44             | 24 | 16.48 | 16.58     | -1.30           | -0.08 | -0.64   | 0.49  |
|                      | Moulodi et al. 2019 | [38]          | Dynamic orthosis                                          | 65.1             | 24 | 16.78 | 65.88             | 24 | 15.63 | 16.22     | -0.78           | -0.05 | -0.61   | 0.52  |
| FAOS-Function        | Moulodi et al. 2019 | [38]          | Static orthosis with toe separator                        | 78.47            | 24 | 18.7  | 84.72             | 24 | 15.47 | 17.16     | -6.25           | -0.36 | -0.93   | 0.21  |
|                      | Moulodi et al. 2019 | [38]          | Dynamic orthosis                                          | 80.55            | 24 | 19.91 | 85.06             | 24 | 16.84 | 18.44     | -4.51           | -0.25 | -0.81   | 0.33  |
| ROM                  | Moulodi et al. 2019 | [38]          | Static orthosis with toe separator                        | 120              | 24 | 18.22 | 121.4             | 24 | 19.72 | 18.99     | -1.35           | -0.07 | -0.64   | 0.50  |
|                      | Moulodi et al. 2019 | [38]          | Dynamic orthosis                                          | 117.5            | 24 | 19.82 | 127.3             | 24 | 17.97 | 18.92     | -9.77           | -0.52 | -1.08   | 0.07  |
| Plantar pressure     | Doty et al. 2015    | [37]          | Full-length orthosis                                      | 47.58            | 25 | 21.59 | 35.76             | 25 | 28.2  | 25.11     | 11.82           | 0.47  | -0.10   | 1.03  |
|                      | Doty et al. 2015    | [37]          | Sulcus-length orthosis                                    | 47.58            | 25 | 21.59 | 43.15             | 25 | 26.2  | 24.01     | 4.43            | 0.18  | -0.37   | 0.74  |
|                      | Doty et al. 2015    | [37]          | 3/4-length orthosis                                       | 47.58            | 25 | 21.59 | 37.21             | 25 | 24.2  | 22.93     | 10.37           | 0.45  | -0.12   | 1.01  |
|                      | Farzadi et al. 2015 | [22]          | Prefabricated full-length foot orthosis with arch support | 123.9            | 16 | 25.3  | 107.1             | 16 | 26.5  | 25.91     | 16.80           | 0.65  | -0.08   | 1.34  |

<sup>a</sup> SMDs  $\geq 0.2$  or  $\leq -0.2$  are highlighted in yellow; SMDs  $\geq 0.5$  or  $\leq -0.5$  are in orange, SMDs  $\geq 0.8$  or  $\leq -0.8$  are in green

Table V Comparison of observations between treatment and control groups <sup>a</sup>

| Parameter                            | Author(s)                       | Reference No. | Orthosis type                           | Pre-intervention |    |      | Post-intervention |    |      | Pooled SD | Mean Difference | SMDs  | 95% CIs |       |
|--------------------------------------|---------------------------------|---------------|-----------------------------------------|------------------|----|------|-------------------|----|------|-----------|-----------------|-------|---------|-------|
|                                      |                                 |               |                                         | Mean             | n  | SD   | Mean              | n  | SD   |           |                 |       | Lower   | Upper |
| HVA                                  | Chadchavalpanichaya et al. 2018 | [36]          | Custom-molded RTV toe separator         | 29.5             | 45 | 5.9  | 32.1              | 45 | 5.4  | 5.66      | -2.60           | -0.46 | -5.00   | -0.23 |
|                                      | Plaass et al. 2020              | [39]          | Dynamic orthosis                        | 32.9             | 34 | 9    | 34.9              | 36 | 9.2  | 9.10      | -2.00           | -0.22 | -6.30   | 2.34  |
|                                      | Reina et al. 2013               | [40]          | Custom-made foot orthoses               | 20.36            | 23 | 4.54 | 21.02             | 23 | 5.14 | 4.85      | -0.66           | -0.14 | -3.50   | 2.22  |
|                                      | Tang et al. 2002                | [41]          | Full-length orthosis with toe separator | 26.19            | 17 | 6.91 | 25.25             | 17 | 7.14 | 7.03      | 0.94            | 0.13  | -4.00   | 5.85  |
| IMA                                  | Plaass et al. 2020              | [39]          | Dynamic orthosis                        | 14.5             | 34 | 3.4  | 15.2              | 36 | 3.1  | 3.25      | -0.70           | -0.22 | -2.30   | 0.85  |
|                                      | Reina et al. 2013               | [40]          | Custom-made foot orthoses               | 10.52            | 23 | 1.85 | 11.1              | 23 | 2.34 | 2.11      | -0.58           | -0.28 | -1.80   | 0.67  |
| Foot pain VAS                        | Torkki et al. 2003              | [43]          | NR                                      | 41               | 69 | 23   | 39                | 69 | 26   | 24.55     | 2.00            | 0.08  | -6.30   | 10.26 |
| Health-related quality of life index | Torkki et al. 2003              | [43]          | NR                                      | 93               | 69 | 6.1  | 93                | 69 | 6.6  | 6.36      | 0.00            | 0.00  | -2.10   | 2.14  |

<sup>a</sup> SMDs  $\geq 0.2$  or  $\leq -0.2$  are highlighted in yellow; SMDs  $\geq 0.5$  or  $\leq -0.5$  are in orange, SMDs  $\geq 0.8$  or  $\leq -0.8$  are in green

## Discussion

This is the first study to systematically evaluate and synthesize results from the extensive pool of literature that investigates the characteristics of HV orthoses and their effects on different factors. The data obtained from meta-analysis suggest that dynamic orthoses, and static orthoses with a toe separator help to reduce the HVA by approximately 2.1° to 5.79° among HV patients [36, 38, 41]. The studies also showed that the dynamic orthoses can reduce the contracture of the first metatarsophalangeal joint and better align the big toe through low torque and prolonged stretching [36, 44, 45]. In dynamic orthoses, the freedom of

1 joint movement does not limit the ROM of the big toe, but help to maintain joint mobility and prevent joint  
2  
3  
4 stiffness, which seem to have a beneficial effect on the treatment of HV [38].  
5  
6  
7

8 The results of this study show that both dynamic and static orthoses have a positive effect, and all static  
9  
10  
11 orthoses that help to reduce the HVA have a toe separator. Tehraninasr et al. [42] further pointed out that  
12  
13  
14 the toe separator can greatly alleviate pain by better aligning the big toe and relieving the overstretched  
15  
16  
17 collateral ligaments and bone subluxation [41, 42]. Generally, due to the ease of use, fit and better  
18  
19  
20 appearance, the users are more satisfied with dynamic than static orthoses [38].  
21  
22  
23

24 The full-length orthosis developed by Tang et al. [41] has a significant and exceptional HVA correction  
25  
26  
27 effect for the HV group. The full-length orthoses tested by Farzadi et al. [22] and Doty et al. [37] help to  
28  
29  
30 reduce the plantar pressure significantly by 11.82 kPa to 16.8 kPa. Therefore, it can be suggested that  
31  
32  
33 forefoot pain has an evident relationship with plantar pressure in the metatarsalgia region [24, 46, 47]. The  
34  
35  
36 foot orthoses with an arch support developed by Farzadi et al. [22] reduces forefoot pain, which might be  
37  
38  
39 associated with better body load distribution by relieving the excessive pressure on the forefoot through  
40  
41  
42 metatarsal unloading. The finding indicates that when considering the length of the orthosis for HV  
43  
44  
45 patients, full-length is optimal. By maximizing the total contact area of the foot with a full-length orthosis,  
46  
47  
48 the peak plantar pressure can be reduced by 30% to 40% [48, 49].  
49  
50  
51

52 Both customized and prefabricated orthoses can significantly reduce the symptoms of HV. Ring and Otter  
53  
54  
55 [50] compared the clinical efficacy of casted foot orthoses and prefabricated foot orthoses in the  
56  
57  
58 treatment of plantar heel pain in 67 patients, and found no significant difference in effectiveness between  
59  
60

1 the bespoke or prefabricated orthoses. In addition, compared to the average cost of bespoke devices, the  
2  
3  
4 prefabricated orthoses are 38% less expensive per patient. They concluded that prefabricated orthoses can  
5  
6  
7 provide benefits that are equivalent to those of casted foot orthoses, but at considerably reduced costs.  
8  
9  
10 As shown in Table II, the material properties, thickness and rigidity of the three orthoses studied remain  
11  
12  
13 unknown. Thus, no conclusion can be made on the best material for HVA reduction. However,  
14  
15  
16 Chadchavalpanichaya et al. [36] found that an RTV silicone toe separator is comfortable to wear. Its  
17  
18  
19 compliance with treatment is higher than that of the nighttime HV strap [36]. The cost of a toe separator  
20  
21  
22 made of RTV silicone is only one-tenth of that of medical grade silicone, which can be considered as a  
23  
24  
25 clinical and cost-effective option [36].  
26  
27  
28  
29 Torkki et al. [18] pointed out that an orthosis can provide short-term symptomatic relief. However, the  
30  
31  
32 wearing duration of the three orthoses in their study ranges from 1 month to 1 year. This may show that  
33  
34  
35 orthoses with a toe separator help to reduce the HVA not only for a short period of time but also on a  
36  
37  
38 continuous basis. Moreover, the angle reduction did not increase with treatment duration, which may  
39  
40  
41 indicate that the treatment reaches its equilibrium result at a certain point of time.  
42  
43  
44  
45  
46  
47

## 48 **Conclusion**

49  
50  
51 Foot orthoses can be an acceptable treatment option to reduce HV deformity. This systematic review  
52  
53  
54 demonstrates a positive relationship between HVA reduction and pain level with orthoses that offer a toe  
55  
56  
57 separator. The length of the orthosis could also be a critical factor in HV treatment. Therefore, it is  
58  
59  
60

1 important to include these two elements in the conservative treatment of HV deformity, as well as the  
2  
3  
4 future development of HV orthoses. It is recommended that a full-length orthosis with a fixed toe  
5  
6  
7 separator or a dynamic orthosis is used to maintain the anatomic alignment of the big toe for those who  
8  
9  
10 suffer from HV. The results of this study provide patients, practitioners and physicians with important  
11  
12  
13 information to help them better understand the characteristics of various HV orthoses and their  
14  
15  
16 performance in reducing HV deformity, and contribute to decisions around optimal treatment for patients.  
17  
18  
19  
20  
21

## 22 **Strengths and limitations**

23  
24  
25 As with any systematic review or meta-analysis, the strength of these results relies on the quality of the  
26  
27  
28 studies included. The limitations of this study include the scarcity of studies found on this topic in the  
29  
30  
31 literature, lack of consistency in the various study methods, and limited consideration of the reliability and  
32  
33  
34 validity of the HV assessments in the included studies. Only a few randomized controlled trials are  
35  
36  
37 compared and reported in this study and there is limited information on the materials of the orthotics  
38  
39  
40 studied. More randomized controlled trials related to HV orthoses are needed, and more research on the  
41  
42  
43 material properties of HV orthoses is also required, in order to offer an effective solution for effective and  
44  
45  
46 optimal designs of HV orthoses.  
47  
48  
49  
50  
51

52 **Contributors** M-YK conceived and wrote this systematic review with meta-analysis. K-LY, JY and C-YT  
53  
54  
55 reviewed the protocol and provided extensive feedback. All authors approved the final manuscript.  
56  
57

58 **Funding** The authors would like to acknowledge the Departmental Grant of Institute of Textiles and  
59  
60

1 Clothing, The Hong Kong Polytechnic University (grant number PolyU RHRM) for funding this project  
2  
3

4 **Competing interests** None declared.  
5  
6

7 **Patient consent** Not required.  
8  
9

10 **Provenance and peer review** Not commissioned; externally peer reviewed.  
11  
12

13 **Data sharing statement** No additional data available.  
14  
15  
16  
17  
18  
19  
20  
21  
22  
23  
24  
25  
26  
27  
28  
29  
30  
31  
32  
33  
34  
35  
36  
37  
38  
39  
40  
41  
42  
43  
44  
45  
46  
47  
48  
49  
50  
51  
52  
53  
54  
55  
56  
57  
58  
59  
60

For peer review only

## References

1. Nix, S., M. Smith, and B. Vicenzino, *Prevalence of hallux valgus in the general population: a systematic review and meta-analysis*. Journal of Foot and Ankle Research, 2010. **3**(1): p. 21-21.
2. Fournier, M., A. Saxena, and N. Maffulli, *Hallux Valgus Surgery in the Athlete: Current Evidence*. The Journal of Foot & Ankle Surgery, 2019. **58**(4): p. 641-643.
3. Hardy, R.H. and J.C.R. Clapham, *Observations on hallux valgus*. Journal of bone and joint surgery, 1951. **33-B**(3): p. 376-391.
4. Piqué-Vidal, C. and J. Vila, *A geometric analysis of hallux valgus: correlation with clinical assessment of severity*. Journal of Foot and Ankle Research, 2009. **2**(1): p. 15-15.
5. Meyr, A.J.D.P.M., et al., *Epidemiological Aspects of the Surgical Correction of Structural Forefoot Pathology*. Journal of Foot and Ankle Surgery, 2009. **48**(5): p. 543-551.
6. Abhishek, A., et al., *Are hallux valgus and big toe pain associated with impaired quality of life? A cross-sectional study*. Osteoarthritis Cartilage, 2010. **18**(7): p. 923-926.
7. Cho, N.H., et al., *The prevalence of hallux valgus and its association with foot pain and function in a rural Korean community*. The Journal of Bone and Joint Surgery, 2009. **91-B**(4): p. 494-498.
8. Menz, H.B., et al., *Impact of hallux valgus severity on general and foot-specific health-related quality of life*. Arthritis Care & Research, 2010. **63**(3).
9. Roddy, E., W. Zhang, and M. Doherty, *Prevalence and associations of hallux valgus in a primary care population*. Arthritis Rheum, 2008. **59**(6): p. 857-862.
10. Hunt, K.J., J.J. McCormick, and R.B. Anderson, *Management of forefoot injuries in the athlete*. Operative Techniques in Sports Medicine, 2010. **18**(1): p. 34-45.
11. Vaseenon, T., et al., *Foot and ankle problems in Muay Thai kickboxers*. Journal of the Medical Association of Thailand, 2015. **98**(1): p. 65-70.
12. Schöffl, V. and T. Küpper, *Feet injuries in rock climbers*. World Journal of Orthopedics, 2013. **4**(4): p. 218.
13. Killian, R.B., G.S. Nishimoto, and J.C. Page, *Foot and ankle injuries related to rock climbing. The role of footwear*. Journal of the American Podiatric Medical Association, 1998. **88**(8): p. 365-374.
14. Steinberg, N., et al., *The association between hallux valgus and proximal joint alignment in young female dancers*. International journal of sports medicine, 2015. **36**(01): p. 67-74.
15. Niek van Dijk, C., et al., *Degenerative Joint Disease in Female Ballet Dancers*. The American Journal of Sports Medicine, 2016. **23**(3): p. 295-300.
16. Steinberg, N., et al., *Morphological characteristics of the young scoliotic dancer*. Physical Therapy in Sport, 2013. **14**(4): p. 213-220.
17. du Plessis, M., et al., *Manual and manipulative therapy compared to night splint for symptomatic hallux abducto valgus: An exploratory randomised clinical trial*. Foot, 2010. **21**(2): p. 71-78.
18. Torkki, M., et al., *Surgery vs orthosis vs watchful waiting for hallux valgus: A randomized controlled trial*. Journal of the American Medical Association, 2001. **285**(19): p. 2474-2480.
19. Coetzee, J., *Scarf Osteotomy for Hallux Valgus Repair: The Dark Side*. Foot & ankle international, 2003. **24**.

- 1 20. Sammarco, G.J. and O.B. Idusuyi, *Complications after surgery of the hallux*. Clinical Orthopaedics  
2 and Related Research, 2001. **391**: p. 59-71.
- 3 21. Jahss, M.H., *Disorders of the foot & ankle : medical and surgical management*. 2nd ed.. ed. 1991,  
4 Philadelphia: Philadelphia : Saunders.
- 5 22. Farzadi, M., et al., *Effect of medial arch support foot orthosis on plantar pressure distribution in*  
6 *females with mild-to-moderate hallux valgus after one month of follow-up*. Prosthetics and  
7 Orthotics International, 2015. **39**(2): p. 1-6.
- 8 23. Charrette, M., *Bunion Formation and Orthotic Support*. Dynamic Chiropractic, 2009. **2**(2): p. 1-3.
- 9 24. Arias-Martín, I., M. Reina-Bueno, and P.V. Munuera-Martínez, *Effectiveness of custom-made foot*  
10 *orthoses for treating forefoot pain: a systematic review*. International Orthopaedics, 2018. **42**(8): p.  
11 1865-1875.
- 12 25. Hawke, F., et al., *Custom foot orthoses for the treatment of foot pain: a systematic review*. Journal  
13 of foot and ankle research, 2008. **1**(S1): p. O46-O46.
- 14 26. Genaidy, A.M. and G.K. LeMasters, *The epidemiological appraisal instrument (EAI): a brief overview*.  
15 Theoretical Issues in Ergonomics Science, 2006. **7**(3): p. 187-189.
- 16 27. Genaidy, A.M., *Cancer risk among firefighters : epidemiological evidence*. 2004, University of  
17 Cincinnati.
- 18 28. Genaidy, A.M., et al., *An epidemiological appraisal instrument - a tool for evaluation of*  
19 *epidemiological studies*. Ergonomics, 2007. **50**(6): p. 920-960.
- 20 29. Faraone, S.V., *Interpreting estimates of treatment effects: implications for managed care*. P&T,  
21 2008. **33**(12): p. 700-711.
- 22 30. Durlak, J.A., *How to select, calculate, and interpret effect sizes*. Journal of pediatric psychology,  
23 2009. **34**(9): p. 917-928.
- 24 31. McGough, J.J. and S.V. Faraone, *Estimating the size of treatment effects: moving beyond p values*.  
25 Psychiatry, 2009. **6**(10): p. 21.
- 26 32. Deeks, J.J., J.P.T. Higgins, and D.G. Altman, *Analysing Data and Undertaking Meta-Analyses*. 2008,  
27 John Wiley & Sons, Ltd: Chichester, UK. p. 243-296.
- 28 33. Cohen, J., *Statistical power analysis for the behavioral sciences*. 2nd ed.. ed. 1988, Hillsdale, N.J.: L.  
29 Erlbaum Associates.
- 30 34. Faraone, S., *Understanding the effect size of ADHD medications: implications for clinical care*.  
31 Medscape Psychiatry & Mental Health, 2003. **8**(2).
- 32 35. Van Eck, N.J. and L. Waltman, *Software survey: VOSviewer, a computer program for bibliometric*  
33 *mapping*. Scientometrics, 2010. **84**(2): p. 523-538.
- 34 36. Chadchavalpanichaya, N., et al., *Effectiveness of the custom-mold room temperature vulcanizing*  
35 *silicone toe separator on hallux valgus: A prospective, randomized single-blinded controlled trial*.  
36 Prosthetics and Orthotics International, 2018. **42**(2): p. 163-170.
- 37 37. Doty, J.F., et al., *Biomechanical Evaluation of Custom Foot Orthoses for Hallux Valgus Deformity*.  
38 Journal of Foot and Ankle Surgery, 2015. **54**(5): p. 852-855.
- 39 38. Moulodi, N., M. Kamyab, and M. Farzadi, *A comparison of the hallux valgus angle, range of motion,*  
40 *and patient satisfaction after use of dynamic and static orthoses*. Foot, 2019. **41**: p. 6-11.



- 1 39. Plaass, C., et al., *Short term results of dynamic splinting for hallux valgus — A prospective*  
2 *randomized study*. Foot and Ankle Surgery, 2020.
- 3 40. Reina, M., G. Lafuente, and P.V. Munuera, *Effect of custom-made foot orthoses in female hallux*  
4 *valgus after one-year follow up*. Prosthetics and Orthotics International, 2013. **37**(2): p. 113-119.
- 5 41. Tang, S.F., et al., *The effects of a new foot-toe orthosis in treating painful hallux valgus*. Archives of  
6 *Physical Medicine and Rehabilitation*, 2002. **83**(12): p. 1792-1795.
- 7 42. Tehraninasr, A., et al., *Effects of insole with toe-separator and night splint on patients with painful*  
8 *hallux valgus: A comparative study*. Prosthetics and Orthotics International, 2008. **32**(1): p. 79-83.
- 9 43. Torkki, M., et al., *Hallux valgus: immediate operation versus 1 year of waiting with or without*  
10 *orthoses: a randomized controlled trial of 209 patients*. Acta Orthopaedica Scandinavica, 2003.  
11 **74**(2): p. 209-215.
- 12 44. Nicholas, J., *Rehabilitation of patients with rheumatic disorders*. Physical medicine and  
13 *rehabilitation*, 1996: p. 711-727.
- 14 45. John, M.M., *Dynamic splinting for hallux valgus and hallux varus: a pilot study*. The Foot and Ankle  
15 *Online Journal*, 2009.
- 16 46. Postema, K., et al., *Primary metatarsalgia: the influence of a custom moulded insole and a rockerbar*  
17 *on plantar pressure*. Prosthetics and Orthotics International, 1998. **22**(1): p. 35-44.
- 18 47. Kelly, A. and I. Winson, *Use of ready-made insoles in the treatment of lesser metatarsalgia: a*  
19 *prospective randomized controlled trial*. Foot & ankle international, 1998. **19**(4): p. 217-220.
- 20 48. Nouman, M., W. Leelasamran, and S. Chatpun, *Effectiveness of total contact orthosis for plantar*  
21 *pressure redistribution in neuropathic diabetic patients during different walking activities*. Foot &  
22 *Ankle International*, 2017. **38**(8): p. 901-908.
- 23 49. Kitaoka, H.B., et al., *Effect of foot orthoses on 3-dimensional kinematics of flatfoot: a cadaveric*  
24 *study*. Archives of Physical Medicine and Rehabilitation, 2002. **83**(6): p. 876-879.
- 25 50. Ring, K. and S. Otter, *Clinical Efficacy and Cost-Effectiveness of Bespoke and Prefabricated Foot*  
26 *Orthoses for Plantar Heel Pain: A Prospective Cohort Study*. Musculoskeletal care, 2014. **12**(1): p. 1-  
27 10.
- 28  
29  
30  
31  
32  
33  
34  
35  
36  
37  
38  
39  
40  
41  
42  
43  
44  
45  
46  
47  
48  
49  
50  
51  
52  
53  
54  
55  
56  
57  
58  
59  
60

1 **Figure legends**  
2  
3

4 Figure 1 (a) Visualization of main keywords from 148 papers, and (b) Flowchart of study selection procedure  
5  
6  
7  
8  
9  
10  
11  
12  
13  
14  
15  
16  
17  
18  
19  
20  
21  
22  
23  
24  
25  
26  
27  
28  
29  
30  
31  
32  
33  
34  
35  
36  
37  
38  
39  
40  
41  
42  
43  
44  
45  
46  
47  
48  
49  
50  
51  
52  
53  
54  
55  
56  
57  
58  
59  
60

For peer review only

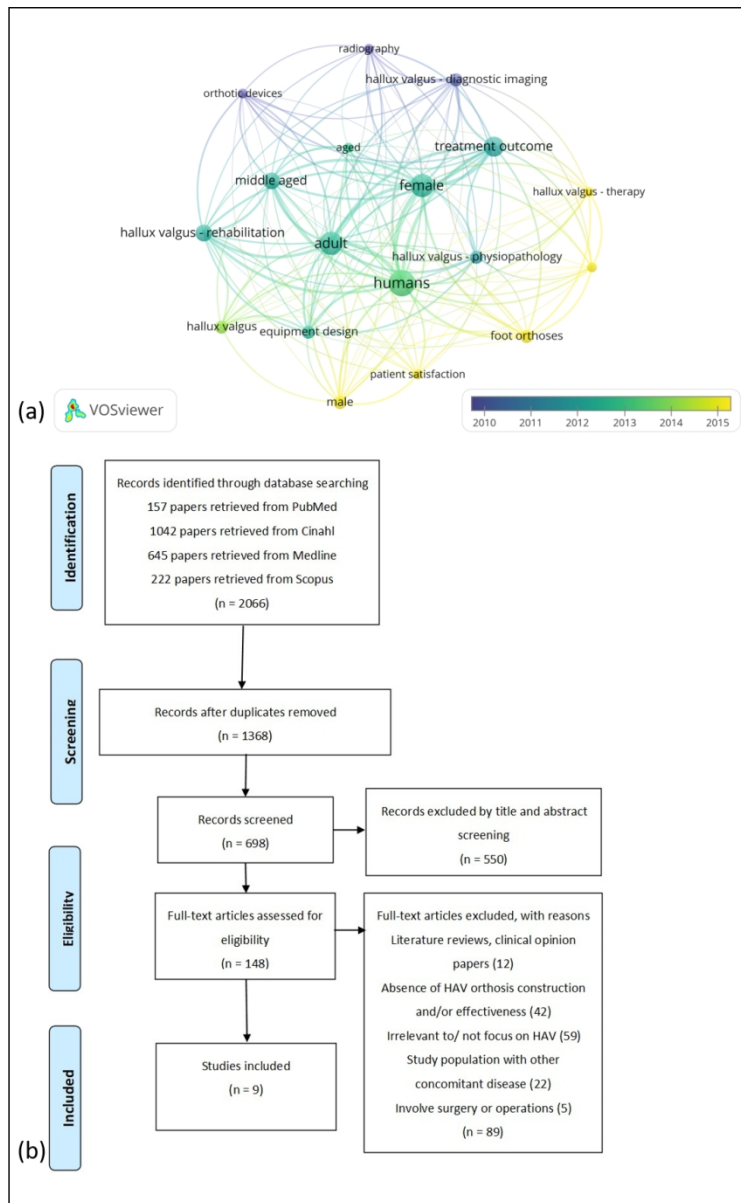

45 Figure I (a) Visualization of main keywords from 148 papers, and (b) Flowchart of study selection procedure

46 184x296mm (300 x 300 DPI)

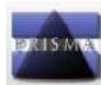

# PRISMA 2009 Checklist

| Section/topic                      | #  | Checklist item                                                                                                                                                                                                                                                                                              | Reported on page # |
|------------------------------------|----|-------------------------------------------------------------------------------------------------------------------------------------------------------------------------------------------------------------------------------------------------------------------------------------------------------------|--------------------|
| <b>TITLE</b>                       |    |                                                                                                                                                                                                                                                                                                             |                    |
| Title                              | 1  | Identify the report as a systematic review, meta-analysis, or both.                                                                                                                                                                                                                                         | 1                  |
| <b>ABSTRACT</b>                    |    |                                                                                                                                                                                                                                                                                                             |                    |
| Structured summary                 | 2  | Provide a structured summary including, as applicable: background; objectives; data sources; study eligibility criteria, participants, and interventions; study appraisal and synthesis methods; results; limitations; conclusions and implications of key findings; systematic review registration number. | 2-3                |
| <b>INTRODUCTION</b>                |    |                                                                                                                                                                                                                                                                                                             |                    |
| Rationale                          | 3  | Describe the rationale for the review in the context of what is already known.                                                                                                                                                                                                                              | 4-5                |
| Objectives                         | 4  | Provide an explicit statement of questions being addressed with reference to participants, interventions, comparisons, outcomes, and study design (PICOS).                                                                                                                                                  | 6                  |
| <b>METHODS</b>                     |    |                                                                                                                                                                                                                                                                                                             |                    |
| Protocol and registration          | 5  | Indicate if a review protocol exists, if and where it can be accessed (e.g., Web address), and, if available, provide registration information including registration number.                                                                                                                               |                    |
| Eligibility criteria               | 6  | Specify study characteristics (e.g., PICOS, length of follow-up) and report characteristics (e.g., years considered, language, publication status) used as criteria for eligibility, giving rationale.                                                                                                      | 7-8                |
| Information sources                | 7  | Describe all information sources (e.g., databases with dates of coverage, contact with study authors to identify additional studies) in the search and date last searched.                                                                                                                                  | 7                  |
| Search                             | 8  | Present full electronic search strategy for at least one database, including any limits used, such that it could be repeated.                                                                                                                                                                               | 7                  |
| Study selection                    | 9  | State the process for selecting studies (i.e., screening, eligibility, included in systematic review, and, if applicable, included in the meta-analysis).                                                                                                                                                   | 8                  |
| Data collection process            | 10 | Describe method of data extraction from reports (e.g., piloted forms, independently, in duplicate) and any processes for obtaining and confirming data from investigators.                                                                                                                                  | 9                  |
| Data items                         | 11 | List and define all variables for which data were sought (e.g., PICOS, funding sources) and any assumptions and simplifications made.                                                                                                                                                                       | 9                  |
| Risk of bias in individual studies | 12 | Describe methods used for assessing risk of bias of individual studies (including specification of whether this was done at the study or outcome level), and how this information is to be used in any data synthesis.                                                                                      | 8                  |
| Summary measures                   | 13 | State the principal summary measures (e.g., risk ratio, difference in means).                                                                                                                                                                                                                               | 8-9                |
| Synthesis of results               | 14 | Describe the methods of handling data and combining results of studies, if done, including measures of consistency (e.g., $I^2$ ) for each meta-analysis.                                                                                                                                                   | 9                  |

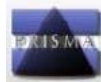

# PRISMA 2009 Checklist

1  
2  
3  
4  
5  
6  
7  
8  
9  
10  
11  
12  
13  
14  
15  
16  
17  
18  
19  
20  
21  
22  
23  
24  
25  
26  
27  
28  
29  
30  
31  
32  
33  
34  
35  
36  
37  
38

| Section/topic                 | #  | Checklist item                                                                                                                                                                                           | Reported on page # |
|-------------------------------|----|----------------------------------------------------------------------------------------------------------------------------------------------------------------------------------------------------------|--------------------|
| Risk of bias across studies   | 15 | Specify any assessment of risk of bias that may affect the cumulative evidence (e.g., publication bias, selective reporting within studies).                                                             | 8                  |
| Additional analyses           | 16 | Describe methods of additional analyses (e.g., sensitivity or subgroup analyses, meta-regression), if done, indicating which were pre-specified.                                                         |                    |
| <b>RESULTS</b>                |    |                                                                                                                                                                                                          |                    |
| Study selection               | 17 | Give numbers of studies screened, assessed for eligibility, and included in the review, with reasons for exclusions at each stage, ideally with a flow diagram.                                          | 10-11              |
| Study characteristics         | 18 | For each study, present characteristics for which data were extracted (e.g., study size, PICOS, follow-up period) and provide the citations.                                                             | 11-13              |
| Risk of bias within studies   | 19 | Present data on risk of bias of each study and, if available, any outcome level assessment (see item 12).                                                                                                | 14-16              |
| Results of individual studies | 20 | For all outcomes considered (benefits or harms), present, for each study: (a) simple summary data for each intervention group (b) effect estimates and confidence intervals, ideally with a forest plot. | 17-23              |
| Synthesis of results          | 21 | Present results of each meta-analysis done, including confidence intervals and measures of consistency.                                                                                                  | 17-23              |
| Risk of bias across studies   | 22 | Present results of any assessment of risk of bias across studies (see Item 15).                                                                                                                          | 14-16              |
| Additional analysis           | 23 | Give results of additional analyses, if done (e.g., sensitivity or subgroup analyses, meta-regression [see Item 16]).                                                                                    |                    |
| <b>DISCUSSION</b>             |    |                                                                                                                                                                                                          |                    |
| Summary of evidence           | 24 | Summarize the main findings including the strength of evidence for each main outcome; consider their relevance to key groups (e.g., healthcare providers, users, and policy makers).                     | 23-25              |
| Limitations                   | 25 | Discuss limitations at study and outcome level (e.g., risk of bias), and at review-level (e.g., incomplete retrieval of identified research, reporting bias).                                            | 26                 |
| Conclusions                   | 26 | Provide a general interpretation of the results in the context of other evidence, and implications for future research.                                                                                  | 25-26              |
| <b>FUNDING</b>                |    |                                                                                                                                                                                                          |                    |
| Funding                       | 27 | Describe sources of funding for the systematic review and other support (e.g., supply of data); role of funders for the systematic review.                                                               | 26-27              |

39 From: Moher D, Liberati A, Tetzlaff J, Altman DG, The PRISMA Group (2009). Preferred Reporting Items for Systematic Reviews and Meta-Analyses: The PRISMA Statement. PLoS Med 6(6): e1000097.  
40 doi:10.1371/journal.pmed1000097

41 For more information, visit: [www.prisma-statement.org](http://www.prisma-statement.org).

42 Page 2 of 2

43 For peer review only - <http://bmjopen.bmj.com/site/about/guidelines.xhtml>

44  
45  
46  
47

# BMJ Open

## Hallux Valgus Orthosis Characteristics and Effectiveness: A Systematic Review with Meta-analysis

|                                 |                                                                                                                                                                                                                                                                                                                           |
|---------------------------------|---------------------------------------------------------------------------------------------------------------------------------------------------------------------------------------------------------------------------------------------------------------------------------------------------------------------------|
| Journal:                        | <i>BMJ Open</i>                                                                                                                                                                                                                                                                                                           |
| Manuscript ID                   | bmjopen-2020-047273.R1                                                                                                                                                                                                                                                                                                    |
| Article Type:                   | Original research                                                                                                                                                                                                                                                                                                         |
| Date Submitted by the Author:   | 06-Jul-2021                                                                                                                                                                                                                                                                                                               |
| Complete List of Authors:       | Kwan, Mei-Ying; The Hong Kong Polytechnic University Institute of Textiles and Clothing<br>Yick, Kit-Lun; The Hong Kong Polytechnic University,<br>Yip, Joanne; The Hong Kong Polytechnic University Institute of Textiles and Clothing<br>Tse, Chi-Yung; Centre for Orthopaedic Surgery                                  |
| <b>Primary Subject Heading</b>: | Qualitative research                                                                                                                                                                                                                                                                                                      |
| Secondary Subject Heading:      | Public health, Evidence based practice                                                                                                                                                                                                                                                                                    |
| Keywords:                       | Foot & ankle < ORTHOPAEDIC & TRAUMA SURGERY, Adult orthopaedics < ORTHOPAEDIC & TRAUMA SURGERY, Bone diseases < ORTHOPAEDIC & TRAUMA SURGERY, Health economics < HEALTH SERVICES ADMINISTRATION & MANAGEMENT, Quality in health care < HEALTH SERVICES ADMINISTRATION & MANAGEMENT, Anatomy < NATURAL SCIENCE DISCIPLINES |
|                                 |                                                                                                                                                                                                                                                                                                                           |

SCHOLARONE™  
Manuscripts



I, the Submitting Author has the right to grant and does grant on behalf of all authors of the Work (as defined in the below author licence), an exclusive licence and/or a non-exclusive licence for contributions from authors who are: i) UK Crown employees; ii) where BMJ has agreed a CC-BY licence shall apply, and/or iii) in accordance with the terms applicable for US Federal Government officers or employees acting as part of their official duties; on a worldwide, perpetual, irrevocable, royalty-free basis to BMJ Publishing Group Ltd ("BMJ") its licensees and where the relevant Journal is co-owned by BMJ to the co-owners of the Journal, to publish the Work in this journal and any other BMJ products and to exploit all rights, as set out in our [licence](#).

The Submitting Author accepts and understands that any supply made under these terms is made by BMJ to the Submitting Author unless you are acting as an employee on behalf of your employer or a postgraduate student of an affiliated institution which is paying any applicable article publishing charge ("APC") for Open Access articles. Where the Submitting Author wishes to make the Work available on an Open Access basis (and intends to pay the relevant APC), the terms of reuse of such Open Access shall be governed by a Creative Commons licence – details of these licences and which [Creative Commons](#) licence will apply to this Work are set out in our licence referred to above.

Other than as permitted in any relevant BMJ Author's Self Archiving Policies, I confirm this Work has not been accepted for publication elsewhere, is not being considered for publication elsewhere and does not duplicate material already published. I confirm all authors consent to publication of this Work and authorise the granting of this licence.

## Hallux Valgus Orthosis Characteristics and Effectiveness: A Systematic Review with Meta-analysis

Mei-Ying Kwan <sup>a</sup>, Kit-Lun Yick <sup>a\*</sup>, Joanne Yip <sup>a</sup>, Chi-Yung Tse <sup>b</sup>

<sup>a</sup> Institute of Textiles and Clothing, The Hong Kong Polytechnic University, Hong Kong

<sup>b</sup> Centre for Orthopaedic Surgery, Hong Kong

\* Correspondence: [tcyick@polyu.edu.hk](mailto:tcyick@polyu.edu.hk); Tel.: +852- 2766 6551

For peer review only



**Abstract**

**Objective** The treatment effect of orthoses for hallux valgus is unclear with little interventional studies, the design involves multiple complex factors, and therefore a systematic analysis with meta-analysis is necessary. The objective of this systematic review and meta-analysis is to determine whether current foot orthoses are effective in treating hallux valgus.

**Design** Systematic review with meta-analysis.

**Data sources** Electronic databases (PubMed, Scopus, Cinahl and Medline) are searched to February 2020.

**Eligibility criteria for selecting studies** Interventional studies with content focus on hallux valgus orthosis design and any of the outcomes related to effectiveness for treating hallux valgus are included. The standardized mean differences are calculated. The risk of bias in included studies is assessed using the Cochrane Collaboration's risk of bias tools.

**Results** In total, 2066 articles are identified. Among them, 9 are selected and quality rated, and data are extracted and closely examined. A meta-analysis is conducted where appropriate. The major bias are missing outcome data and outcome measurement error. The results show that orthosis with a toe separator has the best effect of correcting the hallux valgus angle (SMD 0.50, CI 0.189,0.803).

**Conclusion** The orthoses design with a toe separator or an element that allows for the foot anatomic alignment is critical for reducing the hallux valgus angle and relieving foot pain. The results contribute to a better selection of treatment for patients.

**Funding** The authors would like to acknowledge the Departmental Grant of Institute of Textiles and Clothing, The Hong Kong Polytechnic University (grant number PolyU RHRM) for funding this project.

## Strengths and limitations of this study

- ▣ This systematic review with meta-analysis represents, to the best of our knowledge, the most comprehensive examination of the evidence for the characteristics and effectiveness of orthosis in the treatment of hallux valgus.
- ▣ This study searched articles in large databases including SCOPUS, MEDLINE, PubMed, and Cinahl.
- ▣ The results highlight the key design features of orthosis and their relevance to hallux valgus angle correction and pain relief.
- ▣ This study provides evidence on the use of hallux valgus orthoses in angle correction and toe realignment.
- ▣ There is scarcity of studies on this topic and lack of consistency in the study methods.

## Introduction

Hallux valgus (HV) is a common foot deformity, estimated to affect 23% of adults and 35.7% of the elderly [1]. It is characterized by the hypermobility and pronation of the first metatarsal ray, which eventually lead to subluxation and pain of the first metatarsophalangeal joint [2]. The hallux valgus angle (HVA) and intermetatarsal angle (IMA) are common indicators to objectively measure the degree of the deformity [3, 4]. HV is not only a prevalent and debilitating condition amongst the general public, especially women, due to hereditary or improper footwear but also a significant burden on public health care with the high demand for foot surgery [5], and its association with foot pain [6-9], which can inhibit the level of mobility and physical activity of those who suffer from the deformity [2]. This is especially devastating to athletes, who may acquire the condition due to prolonged periods of training. Previous research work has found that 9.3% of the Muay Thai kickboxers in their study suffer from HV [10-12]. Schöffl and Küpper [12] and Killian et al. [13] found that tight climbing shoes exert high pressure load on the forefoot which affects 53% of the long-term high-level climbers. Steinberg et al. [14] found that 40.0% dancers have bilateral HV and 7.3 % have unilateral HV. Contributors to the development of HV include the individual body structure, joint range of motion (ROM), anatomical abnormalities and extensive dance exercises that expose the spine and the lower limb joints to high loads and strains [14-16]. Former ballet dancers (73.7%) were also found to have a significantly higher HV incidence rate than the control group (2.6%) [15].

Extreme cases of HV require surgical intervention, but the recurrence rate is high. Surgical operations may reduce the subsequent mobility of the big toe, and the impact on athletes can be devastating [2]. Hence,

1 studies have shown that treatment of HV in athletes should be as conservative as possible [10]. The  
2 complications related to HV surgical correction such as nerve damage also discourage surgery [17-21].  
3  
4 Therefore, non-surgical conservative treatments such as the use of foot orthoses have become a viable and  
5  
6  
7 popular option for HV patients to correct their foot deformity and relieve foot pain [17, 22]. As described by  
8  
9  
10 Charrette [23], HV orthoses act as a means of biomechanical support to reduce the pressure on the first  
11  
12 metatarsal joint which would prevent further degeneration of mobility.  
13  
14

15  
16 HV orthoses are available in a wide range of design features and materials. Ready-made and custom-made  
17  
18 are the two main types of foot orthoses [24]. While the former is available online or in retail stores and made  
19  
20 from standard patterns, the latter are constructed by using footprints or foot molds based on specifications  
21  
22 of the clinician [25]. They may or may not have a toe separator, can have different lengths and made of  
23  
24 different materials. The design of HV orthoses is multi-factorial, however, previous related studies have  
25  
26 merely focused on the effectiveness of foot orthoses in HV patients. This article conducts a systematic study  
27  
28 to investigate the effectiveness of these orthoses, and quantitatively synthesizes the results based on the  
29  
30 best available evidence. The results can provide reference for the clinical selection and future design trends  
31  
32  
33 of orthotics to achieve better treatment effects.  
34  
35  
36  
37  
38  
39  
40  
41  
42  
43  
44  
45  
46  
47  
48  
49  
50  
51  
52  
53  
54  
55  
56  
57  
58  
59  
60

## Methods

### *Search methods for identification of studies*

Research articles published in peer-reviewed journals that describe the construction of HV orthoses and/or their effectiveness were searched on PubMed, Scopus, Cinahl and Medline for all years available up to February 2020. The PICO questions designed on the basis of the study selection criteria and a highly sensitive search strategy are reported in Figure 1. The keywords include “hallux valgus”, “orthosis”, “design”, “fabrication”, “construction”, “pressure”, “gait”, “alignment”, “pain” and “walking speed”.

### **Figure 1 PICO question and a list of search strategy**

#### *Inclusion and exclusion criteria*

The titles and abstracts were then reviewed by 2 investigators. Full-text articles that assess HV orthosis designs or any of the outcomes related to the effectiveness of HV orthoses were then retrieved for detailed evaluation. The retrieved items were screened based on a two-stage selection process which subsequently considered the titles, abstracts, and full text. Assessment of the study eligibility was performed by one investigator.

#### *Quality assessment and risk of bias*

The included papers were assessed for methodological quality. The title, journal name, and author details were removed to anonymize the articles prior to the rating process. Quality rating was performed by using the Epidemiological Appraisal Instrument (EAI) [26-29], which has been validated for the assessment of observational studies. Thirty-one items from the original EAI were used, after removing those that are related to interventions, randomization, the follow-up period, or loss to follow-up that are not applicable to

cross-sectional studies. Items were scored as “No” or “Unable to determine” (score = 0), “Partial” (score = 1), “Yes” (score = 2), or “Not Applicable” (item removed from scoring process) and an average score across all items was calculated for each study. Risk of bias was assessed with the use of Cochrane Collaboration tools.

### *Data management*

One investigator recorded the following details for all of the included papers: publication details (author, year, country, and study aim), sample characteristics (number of HV cases, number of control subjects, age and sex), study methodology (device, associated factors investigated, and orthosis wearing details) and result. The standardized mean differences (SMDs) and 95% confidence intervals (CIs) were calculated. To calculate the SMDs, the means and standard deviations (SDs) of pre-intervention and post-intervention [30]. The mean difference was divided by the pooled SD [31]. The SMDs are calculated with the following formulas:

$$1. \text{SMDs}_{\text{intervention}} = \frac{\text{Mean of pre-intervention} - \text{Mean of post-intervention}}{\text{Pooled SD for the entire population}}$$

$$2. \text{SMDs}_{\text{group}} = \frac{\text{Mean of treatment group} - \text{Mean of control group}}{\text{Pooled SD for the entire population}}$$

The interpretation of the SMDs was based on guidelines in previous studies: small effect  $\geq 0.2$ , medium effect  $\geq 0.5$ , and large effect  $\geq 0.8$  [29, 32, 33]. An SMD of "0" means that there is no difference in effect between the groups. SMDs that are "> 0" or "<0" indicate that one group is more efficacious than the other, and vice versa. SMDs are usually accompanied by 95% CIs to evaluate the reliability of the comparison [29, 32, 34].

### *Patient and Public Involvement statement*

1 Patients and/or the public will not be involved in this study.  
2  
3  
4

## 5 **Results**

6  
7

### 8 *Search results*

9  
10  
11

12 This review adhered to the Preferred Reporting Items for Systematic Reviews and Meta-Analysis (PRISMA)

13 Statement and has a registered protocol. The search strategy resulted in 2066 articles from PubMed, Scopus,

14 Cinahl and Medline databases, with 1368 articles removed due to duplications. Then, the title and abstract

15 of 698 articles were screened against the objective of the study, which resulted in the removal of 550 papers

16 as they did not meet the requirements of the study design. The remaining 148 articles were assessed against

17 the inclusion and exclusion criteria by examining the full text and were imported into the VOSviewer (version

18 1.6.13) to examine the trend of the results. Keywords with fewer than 3 occurrences were excluded, and

19 general terms were filtered out so that the focus would be on more specific and informative terms [35].

20 Figure II (a) visualizes the results that amongst the 148 remaining articles, 18 keywords meet the threshold.

21 The total link strength ranged from 26 to 71, with larger label denoting a higher total link strength. On

22 average, the publication years of the articles ranged from 2010 to 2015, in which “male”, “patient

23 satisfaction”, “foot orthoses” and “hallux valgus-therapy” are the latest research terms. After the assessment,

24 another 89 articles were removed. The remaining 9 studies are discussed in this systematic review. Figure II

25 (b) presents a PRISMA flow chart of the article selection process.  
26  
27  
28  
29  
30  
31  
32  
33  
34  
35  
36  
37  
38  
39  
40  
41  
42  
43  
44  
45  
46  
47  
48  
49  
50  
51  
52  
53  
54  
55  
56  
57  
58  
59  
60

1  
2  
3 **Figure II (a) Visualization of main keywords from 148 papers, and (b) Flowchart of study selection**  
4  
5 **procedure**  
6  
7  
8  
9

10 *Study characteristics*  
11

12 The 9 studies selected for inclusion in this paper focused on various characteristics and included different  
13 demographics (Table I). Of the nine studies included, seven were randomized controlled trials [36-40, 41-  
14 42], and the others were uncontrolled intervention study [42] and quasi-experimental [22], respectively. The  
15 age of participants ranged from  $22.79 \pm 1.44$  to  $60.8 \pm 10.8$  years old. The publication years of these papers  
16 range from 2002 to 2020. The studies evaluated the effects of 11 different types of HV orthoses on angle  
17 correction (IMA and HVA), plantar pressure, ROM, pain (Visual Analogue Scale (VAS) and Foot and Ankle  
18 Outcome Score (FAOS) -pain), function during daily activities (the American Orthopedic Foot and Ankle Score  
19 (AOFAS) and FAOS -function) and quality of life (FAOS -quality of life). The number of subjects who suffer  
20 from HV ranged from 16 to 69, with mild to moderate HV. Four of the studies involved control groups with  
21 23 to 69 participants. Overall, the majority of the subjects are female.  
22  
23  
24  
25  
26  
27  
28  
29  
30  
31  
32  
33  
34  
35  
36  
37  
38  
39  
40  
41  
42  
43  
44  
45  
46  
47  
48  
49  
50  
51  
52  
53  
54  
55  
56  
57  
58  
59  
60



Table I Selected characteristics of studies included in analysis (9 unique studies)

| Authors(s)/ Country                        | Reference No. | Study aim                                                                                                                       | Method/ Device                                                                  | N HV | Age (Mean ± SD)                                        | Orthosis                                                              | Orthosis material/ Wearing duration                                                                         | Result                                                                                                                                                                                            |
|--------------------------------------------|---------------|---------------------------------------------------------------------------------------------------------------------------------|---------------------------------------------------------------------------------|------|--------------------------------------------------------|-----------------------------------------------------------------------|-------------------------------------------------------------------------------------------------------------|---------------------------------------------------------------------------------------------------------------------------------------------------------------------------------------------------|
| Chadchavalpa nichaya et al. 2018/ Thailand | [36]          | To investigate the effect of custom-molded room temperature vulcanizing (RTV) silicone toe separator to reduce HVA              | Randomized controlled trial/ Radiographic measurement & clinical assessment     | 45   | HV group: 60.3 ± 9.4<br>Control group: 60.8 ± 10.8     | Custom-molded RTV toe separator                                       | Silicone/ 12 months                                                                                         | Both groups have significant differences in mean HVA with a decrease of 3.3° ± 2.4° for the study group and increase of 1.9° ± 1.9° for the control group. Hallux pain of study group is reduced. |
| Doty et al. 2015/ USA                      | [37]          | To compare the plantar pressure distribution in standard footwear and in the same footwear with orthoses of 3 different lengths | Randomized controlled trial/ Tactilus Free Form® Sensor System                  | 25   | Mean: 57                                               | Full-length orthosis<br>Sulcus-length orthosis<br>3/4-length orthosis | NR/ Immediate                                                                                               | No significant changes in medial pressure with the addition of any orthosis compared with standard footwear alone                                                                                 |
| Farzadi et al. 2015/ Iran                  | [22]          | To investigate the effect of orthosis with medial arch support on plantar pressure distribution                                 | Quasi-experimental/ Pedar-X® in-shoe system                                     | 16   | 26.1 ± 5.7                                             | Prefabricated arch support foot orthosis                              | 5 mm thick polypropylene/ 1 month                                                                           | The use of the foot orthosis leads to a decrease in peak pressure & maximum force                                                                                                                 |
| Moulodi et al. 2019/ Iran                  | [38]          | To compare the HVA, ROM, FAOS, pain & function in daily activities after the use of orthosis                                    | Randomized controlled trial/ clinical assessment                                | 24   | 22.79 ± 1.44                                           | Static orthosis with toe separator<br>Dynamic orthosis                | A bar & a single strap/ 1 month<br>Firm plastic, straps & a free joint/ 1 month                             | Both orthoses can reduce HVA up to 3°; significant difference in ROM by using dynamic orthosis                                                                                                    |
| Plaass et al. 2020/ Germany                | [39]          | To analyze the effect of a dynamic orthosis on IMA & HVA                                                                        | Randomized controlled trial/ Radiographic measurement & clinical assessment     | 36   | HV group: 53.2 ± 14.0<br>Control group: 48.5 ± 12.9    | Dynamic orthosis                                                      | NR/ 3 months                                                                                                | Dynamic orthosis can provide pain relief in patients but showed no effect on HVA                                                                                                                  |
| Reina et al. 2013/ Spain                   | [40]          | To determine if the use of custom-made foot orthotics prevents the advancement of IMA & HVA                                     | Randomized controlled trial/ Radiographic measurement                           | 23   | HV group: 30.31 ± 9.27<br>Control group: 30.94 ± 14.06 | Custom-made foot orthoses                                             | 3 mm thick polypropylene sheet & 3 mm thick polyethylene foam sheet/ 12 months                              | Custom-made orthoses appear to have no effect                                                                                                                                                     |
| Tang et al. 2002/ Taiwan                   | [43]          | To assess the effects of a new foot-toe orthosis on HVA                                                                         | Uncontrolled intervention study/ Radiographic measurement & clinical assessment | 17   | 42.59 ± 16.52                                          | Total contact orthosis with toe separator                             | Plastazote poron, microcell pull, plastazote & mineral oil-based polymer gel toe separator/ 3 months        | The new total contact orthosis with fixed toe separator reduces HVA                                                                                                                               |
| Tehraninasr et al. 2008/ Iran              | [41]          | To compare the effects of wearing an orthosis with toe separator & nighttime orthosis on IMA, HVA & foot pain                   | Randomized controlled trial/ Radiographic measurement                           | 30   | 27 ± 8.91                                              | Orthosis with toe separator<br>Nighttime orthosis                     | Polyfoam, polyethylene, plastazote toe separator/ 3 months<br>Polyfoam & a rigid polyethylene bar/ 3 months | IMA & HVA are reduced in both groups; however, the reduction is not significant; the orthosis with toe separator significantly reduces the pain intensity                                         |
| Torkki et al. 2003/ Finland                | [42]          | To compare the effectiveness of surgical & orthotic treatment with patients on VAS                                              | Randomized controlled trial/ NR                                                 | 69   | HV group: 49 ± 10<br>Control group: 47 ± 9             | NR                                                                    | NR/ 12 months                                                                                               | Orthoses provide short-term symptomatic relief                                                                                                                                                    |

### *Quality assessment and risk of bias*

1  
2  
3  
4 The inter-rater agreement on the EAI is 95% (14 disagreements out of 279 quality assessment items rated)  
5  
6 across all included studies (9 papers). The individual study results for quality appraisal are shown in Table II.  
7  
8 All of the studies defined the associated factors investigated and reported the sampling frame and statistical  
9  
10 methods (9/9, 100%). Most studies clearly reported their aims and study design (8/9, 89%). More than half  
11  
12 of the studies reported the inclusion criteria, sample characteristics, sample size calculations and statistical  
13  
14 parameters (7/9, 78%; 6/9, 67%; 7/9, 78%; and 7/9, 78%, respectively). Few studies reported an attempt to  
15  
16 blind the assessors towards the group allocation (1/4, 25%), although given the nature of HV deformities,  
17  
18 blinding assessors is unlikely to be possible in most studies.  
19  
20  
21  
22  
23

24 Reliability and validity were considered separately for both the HV assessment and measurement of the  
25  
26 associated factors. Only a couple of the studies (2/9; 22%) provided a clear definition of HV by reporting  
27  
28 angle values, another couple of studies (2/9; 22%) reported the reliability for the HV angle assessment, and  
29  
30 only 11% (1/9) reported the validity of the HV assessment. The risk of bias of the included studies is  
31  
32 summarized in Figure III. The main causes of potential bias were missing outcome data and outcome  
33  
34 measurement error.  
35  
36  
37  
38  
39  
40  
41  
42  
43  
44  
45  
46  
47  
48  
49  
50  
51  
52  
53  
54  
55  
56  
57  
58  
59  
60

Table II Results of quality assessment of all included papers (9 unique studies) <sup>a</sup>

| Author(s)                                               | Chadchavalp<br>anichaya et<br>al. 2018 | Doty et<br>al. 2015 | Farzadi<br>et al.<br>2015 | Moulodi<br>et al.<br>2019 | Plaass et<br>al. 2020 | Reina<br>et al.<br>2013 | Tang et<br>al. 2002 | Tehraninasr et<br>al. 2008 | Torkki et<br>al. 2003 | Studies<br>scoring<br>"Yes" (%) |
|---------------------------------------------------------|----------------------------------------|---------------------|---------------------------|---------------------------|-----------------------|-------------------------|---------------------|----------------------------|-----------------------|---------------------------------|
| Reference No.                                           | [36]                                   | [37]                | [22]                      | [38]                      | [39]                  | [40]                    | [43]                | [41]                       | [42]                  |                                 |
| Q1. Reported study aim/objective clearly                | 2                                      | 2                   | 2                         | 2                         | 2                     | 2                       | 2                   | 2                          | 1                     | 89                              |
| Q2. Associated factors clearly defined                  | 2                                      | 2                   | 2                         | 2                         | 2                     | 2                       | 2                   | 2                          | 2                     | 100                             |
| Q3. HV clearly defined                                  | 1                                      | 2                   | 1                         | 0                         | 0                     | 0                       | 0                   | 2                          | 0                     | 22                              |
| Q4. Reported study design                               | 2                                      | 2                   | 2                         | 2                         | 2                     | 2                       | 2                   | 1                          | 2                     | 89                              |
| Q5. Reported sampling frame                             | 2                                      | 2                   | 2                         | 2                         | 2                     | 2                       | 2                   | 2                          | 2                     | 100                             |
| Q6. Reported inclusion criteria                         | 2                                      | 0                   | 2                         | 2                         | 2                     | 2                       | 2                   | 2                          | 0                     | 78                              |
| Q7. Reported participation rate                         | 2                                      | 0                   | 0                         | 2                         | 1                     | 2                       | 1                   | 0                          | 2                     | 44                              |
| Q8. Reported sample characteristics                     | 2                                      | 2                   | 1                         | 1                         | 2                     | 2                       | 2                   | 1                          | 2                     | 67                              |
| Q9. Reported statistical methods                        | 2                                      | 2                   | 2                         | 2                         | 2                     | 2                       | 2                   | 2                          | 2                     | 100                             |
| Q10. Reported all basic data                            | 0                                      | 0                   | 0                         | 0                         | 0                     | 0                       | 2                   | 0                          | 0                     | 11                              |
| Q11. Reported variability in data                       | 2                                      | 0                   | 2                         | 2                         | 2                     | 2                       | 0                   | 2                          | 2                     | 78                              |
| Q12. Reported statistical parameters                    | 2                                      | 2                   | 2                         | 2                         | 2                     | 2                       | 1                   | 1                          | 2                     | 78                              |
| Q13. Sample size calculations                           | 2                                      | 1                   | 2                         | 2                         | 2                     | 2                       | 1                   | 2                          | 2                     | 78                              |
| Q14. Comparability of case/control groups               | 2                                      | -                   | -                         | -                         | 2                     | 2                       | -                   | -                          | 2                     | 100                             |
| Q15. Adequate participation rate                        | 2                                      | 2                   | 2                         | 2                         | 2                     | 2                       | 2                   | 2                          | 2                     | 100                             |
| Q16. Recruitment period for case/control groups         | 2                                      | -                   | -                         | -                         | 2                     | 2                       | -                   | -                          | 0                     | 75                              |
| Q17. Non-responder characteristics described            | 0                                      | 0                   | 0                         | 0                         | 0                     | 0                       | 0                   | 0                          | 0                     | 0                               |
| Q18. Reliability of all associated factors              | 2                                      | 0                   | 1                         | 2                         | 0                     | 0                       | 0                   | 0                          | 0                     | 22                              |
| Q19. Validity of all associated factors                 | 0                                      | 0                   | 0                         | 2                         | 0                     | 0                       | 0                   | 0                          | 0                     | 11                              |
| Q20. Standardized assessment of associated factors      | 2                                      | 2                   | 2                         | 2                         | 2                     | 2                       | 2                   | 2                          | 2                     | 100                             |
| Q21. Blinding of assessors                              | 2                                      | -                   | -                         | -                         | 1                     | 0                       | -                   | -                          | 0                     | 25                              |
| Q22. Reliability of HV assessment                       | 2                                      | 0                   | 0                         | 2                         | 0                     | 0                       | 0                   | 0                          | 0                     | 22                              |
| Q23. Validity of HV assessment                          | 0                                      | 0                   | 0                         | 2                         | 0                     | 0                       | 0                   | 0                          | 0                     | 11                              |
| Q24. Standardized assessment of HV                      | 2                                      | 0                   | 0                         | 0                         | 2                     | 2                       | 2                   | 2                          | 0                     | 56                              |
| Q25. Assessment period for case/control groups          | 2                                      | -                   | -                         | -                         | 2                     | 2                       | -                   | -                          |                       | 100                             |
| Q26. Collected data on HV severity/symptoms             | 2                                      | 0                   | 0                         | 0                         | 2                     | 1                       | 1                   | 1                          | 1                     | 22                              |
| Q27. Adjusted for covariates                            | 0                                      | 0                   | 0                         | 0                         | 0                     | 0                       | 0                   | 0                          | 0                     | 0                               |
| Q28. Reported data for ≥ 3 levels of associated factors | 0                                      | 2                   | 0                         | 0                         | 0                     | 0                       | 0                   | 0                          | 2                     | 2                               |
| Q29. Reported data for subgroups of subjects            | 0                                      | 0                   | 0                         | 0                         | 0                     | 0                       | 0                   | 0                          | 0                     | 0                               |
| Q30. Generalizability of results to study population    | 0                                      | 1                   | 0                         | 0                         | 0                     | 0                       | 0                   | 0                          | 1                     | 0                               |
| Q31. Generalizability of results to other populations   | 2                                      | 0                   | 0                         | 0                         | 2                     | 0                       | 0                   | 2                          | 2                     | 44                              |
| Overall quality score                                   | 1.45                                   | 0.89                | 0.93                      | 1.22                      | 1.23                  | 1.13                    | 0.96                | 1.07                       | 1.06                  |                                 |

<sup>a</sup> Purple shading = “Yes”, Blue shading = “Partial”, White shading = “No” or “Unable to determine”, “-” = “Not applicable”; that is, items removed from scoring process and not included in % calculations.

### Figure III Risk of bias in included studies (a) risk of bias for randomized studies, (b) risk of bias for non-randomized studies

#### *Overview of results from meta-analyses*

Figure IV provides the overall SMDs and SMDs for individual studies in the random-effects model in which eight measurement factors before and after intervention in the HV group are compared, with SMDs  $\geq 0.2$  or  $\leq -0.2$  highlighted in yellow; SMDs  $\geq 0.5$  or  $\leq -0.5$  in orange, and SMDs  $\geq 0.8$  or  $\leq -0.8$  in green. The primary function of HV orthosis is to correct the HVA, and a total of six studies investigated the effect of orthosis on the HVA correction. An overall effect for HV orthosis in correcting HVA was found to be 0.31 (0.075, 0.547). There was small heterogeneity between studies ( $I^2$ : 28.28%). Tang et al. [43] stated that their full-length orthosis with a toe separator provides a significantly positive reduction of the HVA of 5.79° in the HV group (SMD 0.85, CI 0.121,1.546), which has the highest corrective effect among all the recorded orthoses. The static orthosis with a toe separator tested by Moulodi et al. [38] also showed a significant positive HVA correction of 2.67° in the HV group (SMD 0.75, CI 0.143,1.325). Chadchavalpanichaya et al. [36] developed a custom-molded RTV toe separator, which helps to correct the HVA by 2.1° in the HV group (SMD 0.41, CI -0.012,0.827). The pooled estimation for orthoses with a toe separator was further investigated that the effect is medium with SMDs 0.50 (0.189,0.803), with  $I^2$  statistics 14.52%. The dynamic orthosis tested also showed a significantly positive reduction of the HVA of 2.13° (SMD 0.55, CI -0.038,1.127) [38]. The pooled estimation for dynamic orthoses showed small effect in HVA correction with SMDs 0.27 (-0.211,0.751),  $I^2$  42.29%.

Three of the studies investigated the pain score with the use of two different types of rating scales. One of them, Tehraninasr et al. [41], showed that their orthosis with a toe separator can significantly reduce the

1 pain level (SMD 1.13, CI 0.319,1.887). The level of physical functioning before and after the application of an  
2 orthosis have also been compared. An overall effect of -0.30 (-0.700,0.102) was achieved.  
3  
4  
5

6 Two other studies investigated the impact of the foot orthosis on plantar pressure. The overall SMDs in the  
7 random-effects model was found to be 0.41 (0.118, 0.700), indicating that there is small effect for HV  
8 orthosis in plantar pressure reduction. There was no significant heterogeneity between studies ( $I^2$ : 0.00%).  
9  
10 It was found that the prefabricated full-length orthosis with an arch support [22] can significantly reduce the  
11 plantar pressure by 16.8 kPa (SMD 0.65, CI -0.090,1.354).  
12  
13  
14  
15  
16  
17  
18  
19  
20  
21  
22

### 23 *Observation of key design features*

#### 24 ***Customized vs. prefabricated***

25  
26  
27  
28  
29 Among the orthoses that showed a significant reduction of the HVA after treatment amongst the HV patients,  
30 the orthoses developed by Chadchavalpanichaya et al. [36] and Tang et al. [43] are custom-made, while  
31 those in Moulodi et al. [38], Tehraninasr et al. [41], Torkki et al. [42], Doty et al. [37] and Farzadi et al. [22]  
32 are prefabricated. This shows that the ability of an orthosis to reduce the severity of HV or its treatment  
33 effectiveness might not be related to whether it is customized or prefabricated. However, adjustment and  
34 fitting are still key factors, and patients are instructed to adjust the prefabricated orthosis to the best fitting  
35 position [39].  
36  
37  
38  
39  
40  
41  
42  
43  
44  
45  
46  
47

#### 48 ***Static vs. dynamic***

49  
50 In terms of HVA reduction, the results are consistent with those of the HV patients before and after the  
51 intervention. Both types of orthoses have a positive effect on treatment effectiveness, whilst all of the static  
52 orthoses that help to reduce the HVA are embedded with the feature of toe separator. Therefore, the toe  
53 separator seems to be the key element in correcting the misalignment of the big toe.  
54  
55  
56  
57  
58  
59  
60

### **Considerations around orthosis length and arch support**

In terms of the orthosis length, the full-length orthosis in Tang et al. [43] has a significant and exceptional corrective effect of HV in the HV group. The full-length orthoses with arch support in Farzadi et al. [22] can significantly reduce the plantar pressure. These results show that when considering the length of the orthosis for HV patients, full-length is preferred, and arch support may be important to achieve therapeutic effects.

### **Figure IV Comparison of observations**

#### **Discussion**

This is the first study to systematically evaluate and synthesize results from the extensive pool of literature that investigates the characteristics of HV orthoses and their effects on different factors. The data obtained from meta-analysis suggest that dynamic orthoses, and static orthoses with a toe separator help to reduce the HVA by approximately 2.1° to 5.79° among HV patients [36, 38, 43]. The treatment effect of orthoses with a toe separator on HVA correction is larger than that of dynamic orthoses. The full-length orthosis with toe separator developed by Tang et al. [43] has a significant and exceptional HVA correction effect. The use of orthoses with a toe separator for moderate degree HV patients can reduce HVA and hallux pain without serious complications [36, 41]. The studies also showed that the toe separator can greatly alleviate pain by better aligning the big toe and relieving the overstretched collateral ligaments and bone subluxation [43, 41]. However, due to the ease of use, fit and better appearance, users may more satisfied with dynamic than static orthoses [38]. The dynamic orthoses can reduce the contracture of the first metatarsophalangeal joint and better align the big toe through low torque and prolonged stretching [36, 44, 45]. The freedom of joint movement does not limit the ROM of the big toe, but help to maintain joint mobility and prevent joint stiffness, which seem to have a beneficial effect on the treatment of HV [38].

1 The full-length orthoses with an arch support tested by Farzadi et al. [22] help to reduce the plantar pressure  
2 and forefoot pain significantly. It can be suggested that forefoot pain has an evident relationship with plantar  
3 pressure in the metatarsalgia region [24, 46, 47]. This might be associated with better body load distribution  
4 by relieving the excessive pressure on the forefoot through metatarsal unloading. By maximizing the total  
5 contact area of the foot with a full-length orthosis, the peak plantar pressure can be reduced by 30% to 40%  
6 [48, 49]. In addition, with adequate arch support, the anatomical alignment of the foot can be restored  
7 correctly [41].

8 Both customized and prefabricated orthoses can significantly reduce the symptoms of HV. Ring and Otter  
9 [50] compared the clinical efficacy of casted foot orthoses and prefabricated foot orthoses in the treatment  
10 of plantar heel pain in 67 patients, and found no significant difference in effectiveness between the bespoke  
11 or prefabricated orthoses. In addition, compared to the average cost of bespoke devices, the prefabricated  
12 orthoses are 38% less expensive per patient. They concluded that prefabricated orthoses could provide  
13 benefits that are equivalent to those of casted foot orthoses, but at considerably reduced costs. Since the  
14 material properties, thickness, and rigidity of the orthoses studied remain unknown. No conclusion can be  
15 made on the best material for HVA reduction. However, Chadchavalpanichaya et al. [36] found that an RTV  
16 silicone toe separator is comfortable to wear. Its compliance with treatment is higher than that of the  
17 nighttime HV strap [36]. The cost of a toe separator made of RTV silicone is only one-tenth of that of medical  
18 grade silicone, which can be considered as a clinical and cost-effective option [36].

19 Torkki et al. [18] pointed out that an orthosis can provide short-term symptomatic relief. However, the  
20 wearing duration of the three orthoses in their study ranges from 1 month to 1 year. This may show that  
21 orthoses with a toe separator help to reduce the HVA not only for a short period of time but also on a  
22 continuous basis. Moreover, the angle reduction did not increase with treatment duration, which may  
23 indicate that the treatment reaches its equilibrium result at a certain point of time.

## Conclusion

Foot orthoses can be an acceptable treatment option to reduce HV deformity. This systematic review demonstrates a positive relationship between HVA reduction and pain level with orthoses that offer a toe separator. Therefore, it is important to include this element in the conservative treatment of HV deformity, as well as the future development of HV orthoses. It is recommended that a fixed toe separator or a dynamic orthosis is used to maintain the anatomic alignment of the big toe for those who suffer from HV. The results of this study provide patients, practitioners and physicians with important information to help them better understand the characteristics of various HV orthoses and their performance in reducing HV deformity, and contribute to decisions around optimal treatment for patients.

## Strengths and limitations

As with any systematic review or meta-analysis, the strength of these results relies on the quality of the studies included. The limitations of this study include the scarcity of studies found on this topic in the literature, lack of consistency in the various study methods, subjects' conditions, and limited consideration of the reliability and validity of the HV assessments in the included studies. Only a few randomized controlled trials are compared and reported in this study and there is limited information on the materials of the orthotics studied. More randomized controlled trials related to HV orthoses are needed, and more research on the material properties of HV orthoses is also required, in order to offer an effective solution for effective and optimal designs of HV orthoses.

**Contributors** M-YK conceived and wrote this systematic review with meta-analysis. K-LY, JY and C-YT reviewed the protocol and provided extensive feedback. All authors approved the final manuscript.

**Funding** The authors would like to acknowledge the Departmental Grant of Institute of Textiles and Clothing, The Hong Kong Polytechnic University (grant number PolyU RHRM) for funding this project

**Competing interests** None declared.



1 **Patient consent** Not required.

2  
3 **Ethics approval** This study was approved by the Human Subjects Ethics Sub-committee of The Hong Kong  
4  
5 Polytechnic University (Reference Number: HSEARS20190924004). Since the current work is review article  
6  
7 with meta-analysis, there is no participants and/or informed consent.  
8

9  
10 **Provenance and peer review** Not commissioned; externally peer reviewed.  
11

12 **Data sharing statement** No additional data available.  
13  
14  
15  
16  
17  
18  
19  
20  
21  
22  
23  
24  
25  
26  
27  
28  
29  
30  
31  
32  
33  
34  
35  
36  
37  
38  
39  
40  
41  
42  
43  
44  
45  
46  
47  
48  
49  
50  
51  
52  
53  
54  
55  
56  
57  
58  
59  
60

For peer review only

## References

1. Nix, S., M. Smith, and B. Vicenzino, *Prevalence of hallux valgus in the general population: a systematic review and meta-analysis*. Journal of Foot and Ankle Research, 2010. **3**(1): p. 21-21.
2. Fournier, M., A. Saxena, and N. Maffulli, *Hallux Valgus Surgery in the Athlete: Current Evidence*. The Journal of Foot & Ankle Surgery, 2019. **58**(4): p. 641-643.
3. Hardy, R.H. and J.C.R. Clapham, *Observations on hallux valgus*. Journal of bone and joint surgery, 1951. **33-B**(3): p. 376-391.
4. Piqué-Vidal, C. and J. Vila, *A geometric analysis of hallux valgus: correlation with clinical assessment of severity*. Journal of Foot and Ankle Research, 2009. **2**(1): p. 15-15.
5. Meyr, A.J.D.P.M., et al., *Epidemiological Aspects of the Surgical Correction of Structural Forefoot Pathology*. Journal of Foot and Ankle Surgery, 2009. **48**(5): p. 543-551.
6. Abhishek, A., et al., *Are hallux valgus and big toe pain associated with impaired quality of life? A cross-sectional study*. Osteoarthritis Cartilage, 2010. **18**(7): p. 923-926.
7. Cho, N.H., et al., *The prevalence of hallux valgus and its association with foot pain and function in a rural Korean community*. The Journal of Bone and Joint Surgery, 2009. **91-B**(4): p. 494-498.
8. Menz, H.B., et al., *Impact of hallux valgus severity on general and foot-specific health-related quality of life*. Arthritis Care & Research, 2010. **63**(3).
9. Roddy, E., W. Zhang, and M. Doherty, *Prevalence and associations of hallux valgus in a primary care population*. Arthritis Rheum, 2008. **59**(6): p. 857-862.
10. Hunt, K.J., J.J. McCormick, and R.B. Anderson, *Management of forefoot injuries in the athlete*. Operative Techniques in Sports Medicine, 2010. **18**(1): p. 34-45.
11. Vaseenon, T., et al., *Foot and ankle problems in Muay Thai kickboxers*. Journal of the Medical Association of Thailand, 2015. **98**(1): p. 65-70.
12. Schöffl, V. and T. Küpper, *Feet injuries in rock climbers*. World Journal of Orthopedics, 2013. **4**(4): p. 218.
13. Killian, R.B., G.S. Nishimoto, and J.C. Page, *Foot and ankle injuries related to rock climbing. The role of footwear*. Journal of the American Podiatric Medical Association, 1998. **88**(8): p. 365-374.
14. Steinberg, N., et al., *The association between hallux valgus and proximal joint alignment in young female dancers*. International journal of sports medicine, 2015. **36**(01): p. 67-74.
15. Niek van Dijk, C., et al., *Degenerative Joint Disease in Female Ballet Dancers*. The American Journal of Sports Medicine, 2016. **23**(3): p. 295-300.
16. Steinberg, N., et al., *Morphological characteristics of the young scoliotic dancer*. Physical Therapy in Sport, 2013. **14**(4): p. 213-220.
17. du Plessis, M., et al., *Manual and manipulative therapy compared to night splint for symptomatic hallux abducto valgus: An exploratory randomised clinical trial*. Foot, 2010. **21**(2): p. 71-78.
18. Torkki, M., et al., *Surgery vs orthosis vs watchful waiting for hallux valgus: A randomized controlled trial*. Journal of the American Medical Association, 2001. **285**(19): p. 2474-2480.
19. Coetzee, J., *Scarf Osteotomy for Hallux Valgus Repair: The Dark Side*. Foot & ankle international, 2003. **24**.
20. Sammarco, G.J. and O.B. Idusuyi, *Complications after surgery of the hallux*. Clinical Orthopaedics and Related Research, 2001. **391**: p. 59-71.
21. Jahss, M.H., *Disorders of the foot & ankle : medical and surgical management*. 2nd ed.. ed. 1991, Philadelphia: Philadelphia : Saunders.
22. Farzadi, M., et al., *Effect of medial arch support foot orthosis on plantar pressure distribution in females with mild-to-moderate hallux valgus after one month of follow-up*. Prosthetics and Orthotics International, 2015. **39**(2): p. 1-6.
23. Charrette, M., *Bunion Formation and Orthotic Support*. Dynamic Chiropractic, 2009. **2**(2): p. 1-3.
24. Arias-Martín, I., M. Reina-Bueno, and P.V. Munuera-Martínez, *Effectiveness of custom-made foot*

- 1  
2  
3  
4  
5  
6  
7  
8  
9  
10  
11  
12  
13  
14  
15  
16  
17  
18  
19  
20  
21  
22  
23  
24  
25  
26  
27  
28  
29  
30  
31  
32  
33  
34  
35  
36  
37  
38  
39  
40  
41  
42  
43  
44  
45  
46  
47  
48  
49  
50  
51  
52  
53  
54  
55  
56  
57  
58  
59  
60
- orthoses for treating forefoot pain: a systematic review.* International Orthopaedics, 2018. **42**(8): p. 1865-1875.
25. Hawke, F., et al., *Custom foot orthoses for the treatment of foot pain: a systematic review.* Journal of foot and ankle research, 2008. **1**(S1): p. O46-O46.
26. Genaidy, A.M. and G.K. LeMasters, *The epidemiological appraisal instrument (EAI): a brief overview.* Theoretical Issues in Ergonomics Science, 2006. **7**(3): p. 187-189.
27. Genaidy, A.M., *Cancer risk among firefighters : epidemiological evidence.* 2004, University of Cincinnati.
28. Genaidy, A.M., et al., *An epidemiological appraisal instrument - a tool for evaluation of epidemiological studies.* Ergonomics, 2007. **50**(6): p. 920-960.
29. Faraone, S.V., *Interpreting estimates of treatment effects: implications for managed care.* P&T, 2008. **33**(12): p. 700-711.
30. Durlak, J.A., *How to select, calculate, and interpret effect sizes.* Journal of pediatric psychology, 2009. **34**(9): p. 917-928.
31. Deeks, J.J., J.P.T. Higgins, and D.G. Altman, *Analysing Data and Undertaking Meta-Analyses.* 2008, John Wiley & Sons, Ltd: Chichester, UK. p. 243-296.
32. McGough, J.J. and S.V. Faraone, *Estimating the size of treatment effects: moving beyond p values.* Psychiatry, 2009. **6**(10): p. 21.
33. Cohen, J., *Statistical power analysis for the behavioral sciences.* 2nd ed. 1988, Hillsdale, N.J.: L. Erlbaum Associates.
34. Faraone, S., *Understanding the effect size of ADHD medications: implications for clinical care.* Medscape Psychiatry & Mental Health, 2003. **8**(2).
35. Van Eck, N.J. and L. Waltman, *Software survey: VOSviewer, a computer program for bibliometric mapping.* Scientometrics, 2010. **84**(2): p. 523-538.
36. Chadchavalpanichaya, N., et al., *Effectiveness of the custom-mold room temperature vulcanizing silicone toe separator on hallux valgus: A prospective, randomized single-blinded controlled trial.* Prosthetics and Orthotics International, 2018. **42**(2): p. 163-170.
37. Doty, J.F., et al., *Biomechanical Evaluation of Custom Foot Orthoses for Hallux Valgus Deformity.* Journal of Foot and Ankle Surgery, 2015. **54**(5): p. 852-855.
38. Moulodi, N., M. Kamyab, and M. Farzadi, *A comparison of the hallux valgus angle, range of motion, and patient satisfaction after use of dynamic and static orthoses.* Foot, 2019. **41**: p. 6-11.
39. Plaass, C., et al., *Short term results of dynamic splinting for hallux valgus — A prospective randomized study.* Foot and Ankle Surgery, 2020.
40. Reina, M., G. Lafuente, and P.V. Munuera, *Effect of custom-made foot orthoses in female hallux valgus after one-year follow up.* Prosthetics and Orthotics International, 2013. **37**(2): p. 113-119.
41. Tehraninasr, A., et al., *Effects of insole with toe-separator and night splint on patients with painful hallux valgus: A comparative study.* Prosthetics and Orthotics International, 2008. **32**(1): p. 79-83.
42. Torkki, M., et al., *Hallux valgus: immediate operation versus 1 year of waiting with or without orthoses: a randomized controlled trial of 209 patients.* Acta Orthopaedica Scandinavica, 2003. **74**(2): p. 209-215.
43. Tang, S.F., et al., *The effects of a new foot-toe orthosis in treating painful hallux valgus.* Archives of Physical Medicine and Rehabilitation, 2002. **83**(12): p. 1792-1795.
44. Nicholas, J., *Rehabilitation of patients with rheumatic disorders.* Physical medicine and rehabilitation, 1996: p. 711-727.
45. John, M.M., *Dynamic splinting for hallux valgus and hallux varus: a pilot study.* The Foot and Ankle Online Journal, 2009.
46. Postema, K., et al., *Primary metatarsalgia: the influence of a custom moulded insole and a rockerbar on plantar pressure.* Prosthetics and Orthotics International, 1998. **22**(1): p. 35-44.
47. Kelly, A. and I. Winson, *Use of ready-made insoles in the treatment of lesser metatarsalgia: a*

- 1  
2  
3  
4  
5  
6  
7  
8  
9  
10  
11  
12  
13  
14  
15  
16  
17  
18  
19  
20  
21  
22  
23  
24  
25  
26  
27  
28  
29  
30  
31  
32  
33  
34  
35  
36  
37  
38  
39  
40  
41  
42  
43  
44  
45  
46  
47  
48  
49  
50  
51  
52  
53  
54  
55  
56  
57  
58  
59  
60
- prospective randomized controlled trial. Foot & ankle international, 1998. 19(4): p. 217-220.*
48. Nouman, M., W. Leelasamran, and S. Chatpun, *Effectiveness of total contact orthosis for plantar pressure redistribution in neuropathic diabetic patients during different walking activities. Foot & Ankle International, 2017. 38(8): p. 901-908.*
49. Kitaoka, H.B., et al., *Effect of foot orthoses on 3-dimensional kinematics of flatfoot: a cadaveric study. Archives of Physical Medicine and Rehabilitation, 2002. 83(6): p. 876-879.*
50. Ring, K. and S. Otter, *Clinical Efficacy and Cost-Effectiveness of Bespoke and Prefabricated Foot Orthoses for Plantar Heel Pain: A Prospective Cohort Study. Musculoskeletal care, 2014. 12(1): p. 1-10.*

For peer review only

**Figure legends**

Figure I PICO question and a list of search strategy

Figure II (a) Visualization of main keywords from 148 papers, and (b) Flowchart of study selection procedure

Figure III Risk of bias in included studies (a) risk of bias for randomized studies, (b) risk of bias for non-randomized studies

Figure IV Comparison of observations

For peer review only

| PICO question   |                                                                                                                                           |                                                                                                                          |
|-----------------|-------------------------------------------------------------------------------------------------------------------------------------------|--------------------------------------------------------------------------------------------------------------------------|
| P               | Population or Problem                                                                                                                     | Studies that included people with hallux valgus, and people without hallux valgus at baseline were included              |
| I               | Intervention                                                                                                                              | Randomized controlled trial, uncontrolled intervention study and quasi-experimental of the use of hallux valgus orthoses |
| C               | Comparison or control                                                                                                                     | The comparison could be no hallux valgus orthotic treatment, or other orthotic designs                                   |
| O               | Outcome                                                                                                                                   | Any effect of hallux valgus orthotic treatment                                                                           |
| Search strategy |                                                                                                                                           |                                                                                                                          |
| 1.              | ("Hallux Valgus" AND (Design OR Fabrication OR Construction)) NOT (Implant OR Replacement)                                                |                                                                                                                          |
| 2.              | ("Hallux Valgus" AND (Orthoses OR Orthosis) AND (Design OR Fabrication OR Construction)) NOT (Implant OR Replacement)                     |                                                                                                                          |
| 3.              | ("Hallux Valgus" AND (Orthoses OR Orthosis) AND Pressure) NOT (Implant OR Replacement)                                                    |                                                                                                                          |
| 4.              | ("Hallux Valgus" AND (Orthoses OR Orthosis) AND Gait) NOT (Implant OR Replacement)                                                        |                                                                                                                          |
| 5.              | ("Hallux Valgus" AND (Orthoses OR Orthosis) AND Alignment) NOT (Implant OR Replacement)                                                   |                                                                                                                          |
| 6.              | ("Hallux Valgus" AND (Orthoses OR Orthosis) AND Pain) NOT (Implant OR Replacement)                                                        |                                                                                                                          |
| 7.              | ("Hallux Valgus" AND (Orthoses OR Orthosis) AND "Walking speed") NOT (Implant OR Replacement)                                             |                                                                                                                          |
| 8.              | ("Hallux Valgus" AND (Orthoses OR Orthosis) AND (Design OR Fabrication OR Construction) AND Pressure) NOT (Implant OR Replacement)        |                                                                                                                          |
| 9.              | ("Hallux Valgus" AND (Orthoses OR Orthosis) AND (Design OR Fabrication OR Construction) AND Gait) NOT (Implant OR Replacement)            |                                                                                                                          |
| 10.             | ("Hallux Valgus" AND (Orthoses OR Orthosis) AND (Design OR Fabrication OR Construction) AND Alignment) NOT (Implant OR Replacement)       |                                                                                                                          |
| 11.             | ("Hallux Valgus" AND (Orthoses OR Orthosis) AND (Design OR Fabrication OR Construction) AND Pain) NOT (Implant OR Replacement)            |                                                                                                                          |
| 12.             | ("Hallux Valgus" AND (Orthoses OR Orthosis) AND (Design OR Fabrication OR Construction) AND "Walking speed") NOT (Implant OR Replacement) |                                                                                                                          |

Figure I PICO question and a list of search strategy

242x90mm (150 x 150 DPI)

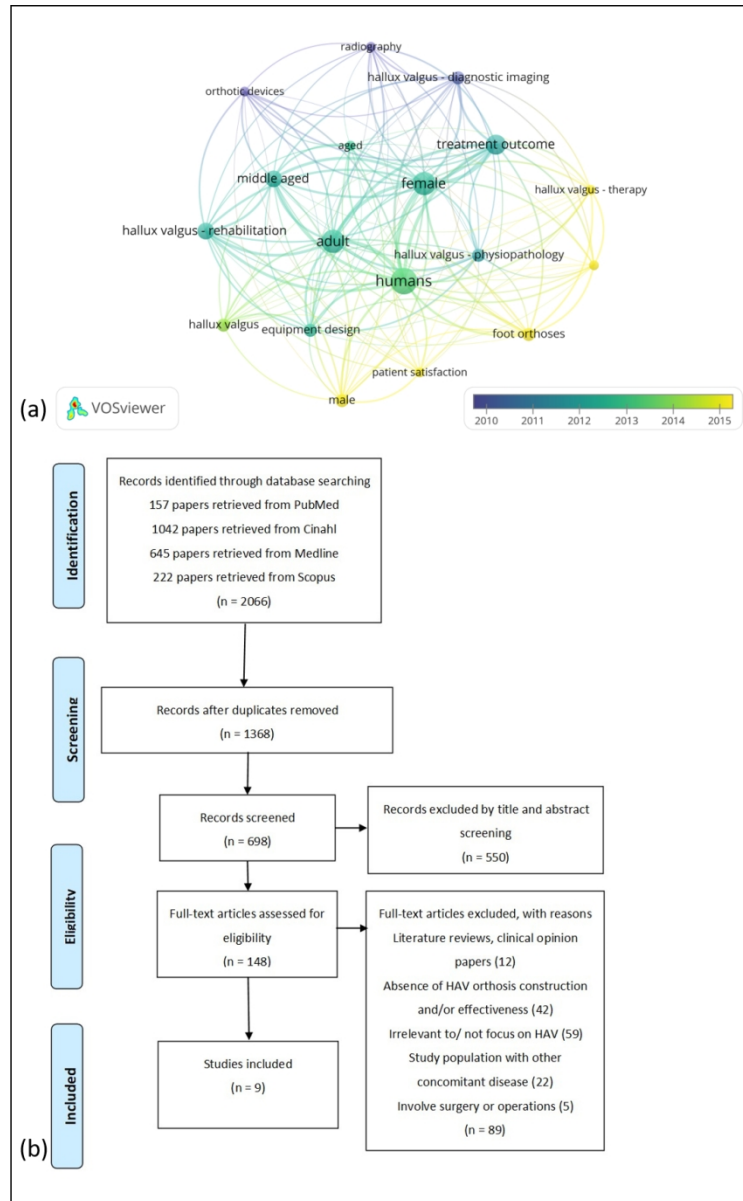

Figure II (a) Visualization of main keywords from 148 papers, and (b) Flowchart of study selection procedure

184x296mm (300 x 300 DPI)



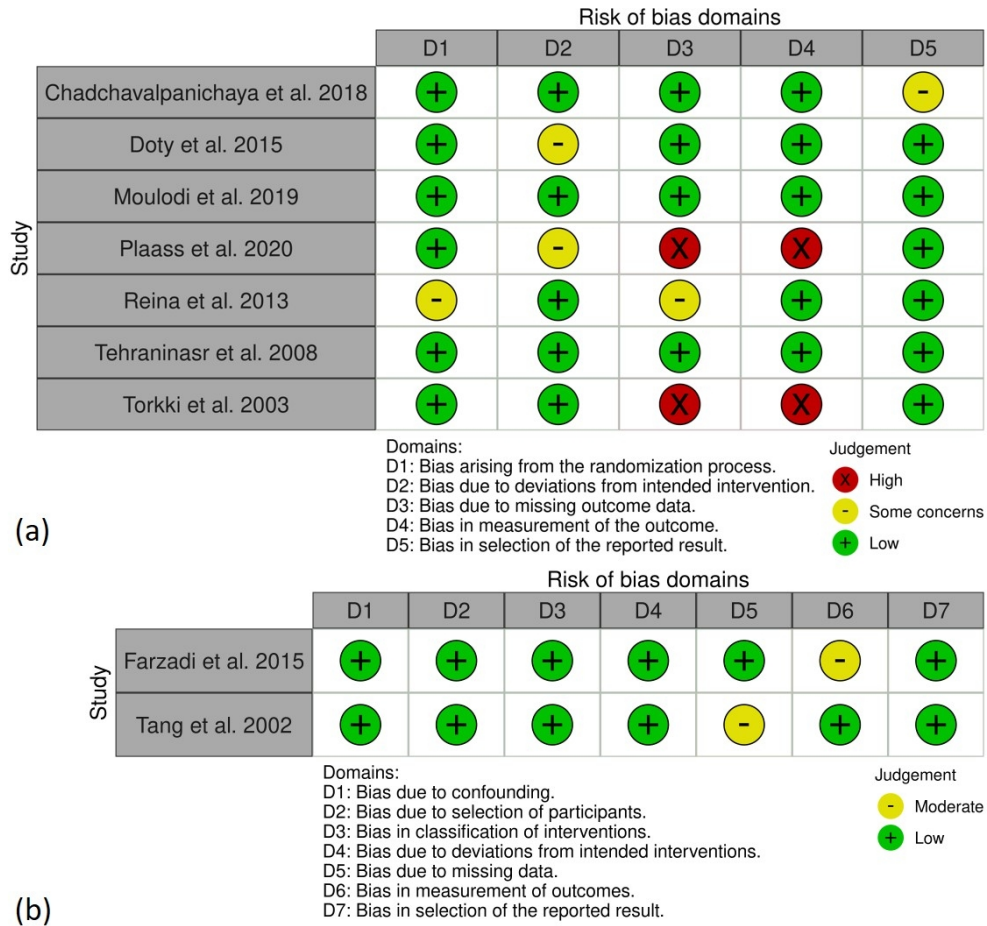

Figure III Risk of bias in included studies (a) risk of bias for randomized studies, (b) risk of bias for non-randomized studies

193x184mm (150 x 150 DPI)



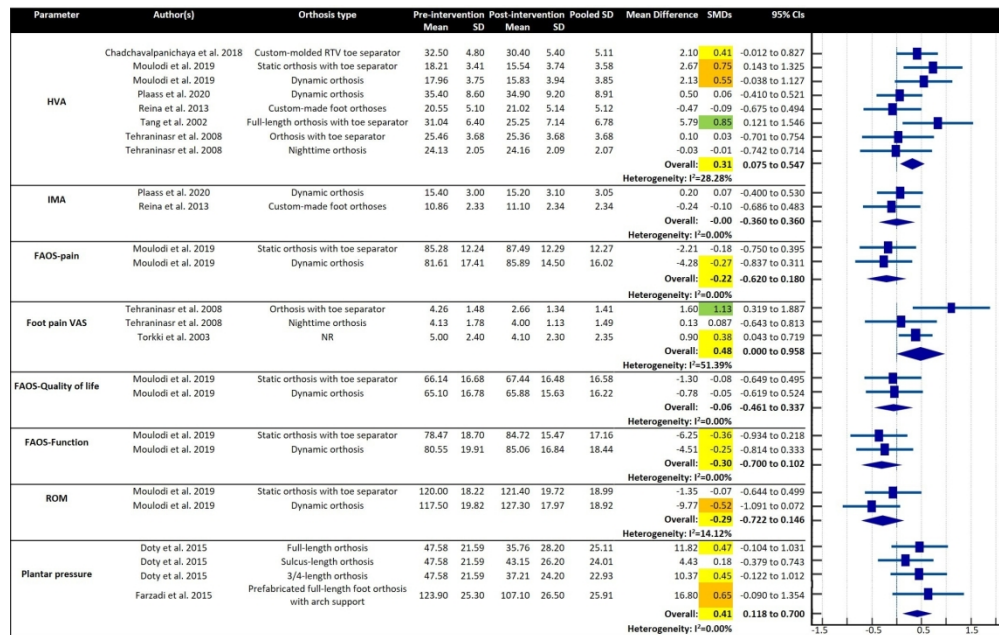

Figure IV Comparison of observations

356x226mm (150 x 150 DPI)

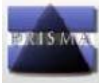

## PRISMA 2020 for Abstracts Checklist

| Section and Topic       | Item # | Checklist item                                                                                                                                                                                                                                                                                        | Reported (Yes/No) |
|-------------------------|--------|-------------------------------------------------------------------------------------------------------------------------------------------------------------------------------------------------------------------------------------------------------------------------------------------------------|-------------------|
| <b>TITLE</b>            |        |                                                                                                                                                                                                                                                                                                       |                   |
| Title                   | 1      | Identify the report as a systematic review.                                                                                                                                                                                                                                                           | Yes               |
| <b>BACKGROUND</b>       |        |                                                                                                                                                                                                                                                                                                       |                   |
| Objectives              | 2      | Provide an explicit statement of the main objective(s) or question(s) the review addresses.                                                                                                                                                                                                           | Yes               |
| <b>METHODS</b>          |        |                                                                                                                                                                                                                                                                                                       |                   |
| Eligibility criteria    | 3      | Specify the inclusion and exclusion criteria for the review.                                                                                                                                                                                                                                          | Yes               |
| Information sources     | 4      | Specify the information sources (e.g. databases, registers) used to identify studies and the date when each was last searched.                                                                                                                                                                        | Yes               |
| Risk of bias            | 5      | Specify the methods used to assess risk of bias in the included studies.                                                                                                                                                                                                                              | Yes               |
| Synthesis of results    | 6      | Specify the methods used to present and synthesise results.                                                                                                                                                                                                                                           | Yes               |
| <b>RESULTS</b>          |        |                                                                                                                                                                                                                                                                                                       |                   |
| Included studies        | 7      | Give the total number of included studies and participants and summarise relevant characteristics of studies.                                                                                                                                                                                         | Yes               |
| Synthesis of results    | 8      | Present results for main outcomes, preferably indicating the number of included studies and participants for each. If meta-analysis was done, report the summary estimate and confidence/credible interval. If comparing groups, indicate the direction of the effect (i.e. which group is favoured). | Yes               |
| <b>DISCUSSION</b>       |        |                                                                                                                                                                                                                                                                                                       |                   |
| Limitations of evidence | 9      | Provide a brief summary of the limitations of the evidence included in the review (e.g. study risk of bias, inconsistency and imprecision).                                                                                                                                                           | Yes               |
| Interpretation          | 10     | Provide a general interpretation of the results and important implications.                                                                                                                                                                                                                           | Yes               |
| <b>OTHER</b>            |        |                                                                                                                                                                                                                                                                                                       |                   |
| Funding                 | 11     | Specify the primary source of funding for the review.                                                                                                                                                                                                                                                 | Yes               |
| Registration            | 12     | Provide the register name and registration number.                                                                                                                                                                                                                                                    | No                |

From: Page MJ, McKenzie JE, Bossuyt PM, Boutron I, Hoffmann TC, Mulrow CD, et al. The PRISMA 2020 statement: an updated guideline for reporting systematic reviews. *BMJ* 2021;372:n71. doi: 10.1136/bmj.n71

For more information, visit: <http://www.prisma-statement.org/>

# BMJ Open

## Hallux Valgus Orthosis Characteristics and Effectiveness: A Systematic Review with Meta-analysis

|                                 |                                                                                                                                                                                                                                                                                                                           |
|---------------------------------|---------------------------------------------------------------------------------------------------------------------------------------------------------------------------------------------------------------------------------------------------------------------------------------------------------------------------|
| Journal:                        | <i>BMJ Open</i>                                                                                                                                                                                                                                                                                                           |
| Manuscript ID                   | bmjopen-2020-047273.R2                                                                                                                                                                                                                                                                                                    |
| Article Type:                   | Original research                                                                                                                                                                                                                                                                                                         |
| Date Submitted by the Author:   | 27-Jul-2021                                                                                                                                                                                                                                                                                                               |
| Complete List of Authors:       | Kwan, Mei-Ying; The Hong Kong Polytechnic University Institute of Textiles and Clothing<br>Yick, Kit-Lun; The Hong Kong Polytechnic University,<br>Yip, Joanne; The Hong Kong Polytechnic University Institute of Textiles and Clothing<br>Tse, Chi-Yung; Centre for Orthopaedic Surgery                                  |
| <b>Primary Subject Heading</b>: | Qualitative research                                                                                                                                                                                                                                                                                                      |
| Secondary Subject Heading:      | Public health, Evidence based practice                                                                                                                                                                                                                                                                                    |
| Keywords:                       | Foot & ankle < ORTHOPAEDIC & TRAUMA SURGERY, Adult orthopaedics < ORTHOPAEDIC & TRAUMA SURGERY, Bone diseases < ORTHOPAEDIC & TRAUMA SURGERY, Health economics < HEALTH SERVICES ADMINISTRATION & MANAGEMENT, Quality in health care < HEALTH SERVICES ADMINISTRATION & MANAGEMENT, Anatomy < NATURAL SCIENCE DISCIPLINES |
|                                 |                                                                                                                                                                                                                                                                                                                           |

SCHOLARONE™  
Manuscripts



I, the Submitting Author has the right to grant and does grant on behalf of all authors of the Work (as defined in the below author licence), an exclusive licence and/or a non-exclusive licence for contributions from authors who are: i) UK Crown employees; ii) where BMJ has agreed a CC-BY licence shall apply, and/or iii) in accordance with the terms applicable for US Federal Government officers or employees acting as part of their official duties; on a worldwide, perpetual, irrevocable, royalty-free basis to BMJ Publishing Group Ltd ("BMJ") its licensees and where the relevant Journal is co-owned by BMJ to the co-owners of the Journal, to publish the Work in this journal and any other BMJ products and to exploit all rights, as set out in our [licence](#).

The Submitting Author accepts and understands that any supply made under these terms is made by BMJ to the Submitting Author unless you are acting as an employee on behalf of your employer or a postgraduate student of an affiliated institution which is paying any applicable article publishing charge ("APC") for Open Access articles. Where the Submitting Author wishes to make the Work available on an Open Access basis (and intends to pay the relevant APC), the terms of reuse of such Open Access shall be governed by a Creative Commons licence – details of these licences and which [Creative Commons](#) licence will apply to this Work are set out in our licence referred to above.

Other than as permitted in any relevant BMJ Author's Self Archiving Policies, I confirm this Work has not been accepted for publication elsewhere, is not being considered for publication elsewhere and does not duplicate material already published. I confirm all authors consent to publication of this Work and authorise the granting of this licence.

## Hallux Valgus Orthosis Characteristics and Effectiveness: A Systematic Review with Meta-analysis

Mei-Ying Kwan <sup>a</sup>, Kit-Lun Yick <sup>a\*</sup>, Joanne Yip <sup>a</sup>, Chi-Yung Tse <sup>b</sup>

<sup>a</sup> Institute of Textiles and Clothing, The Hong Kong Polytechnic University, Hong Kong

<sup>b</sup> Centre for Orthopaedic Surgery, Hong Kong

\* Correspondence: [tcyick@polyu.edu.hk](mailto:tcyick@polyu.edu.hk); Tel.: +852- 2766 6551

For peer review only

**Abstract**

**Objective** The treatment effect of orthoses for hallux valgus is unclear with little interventional studies, the design involves multiple complex factors, and therefore a systematic analysis with meta-analysis is necessary. The objective of this systematic review and meta-analysis is to determine whether current foot orthoses are effective in treating hallux valgus.

**Design** Systematic review with meta-analysis.

**Data sources** Electronic databases (PubMed, Scopus, Cinahl and Medline) are searched to February 2020.

**Eligibility criteria for selecting studies** Interventional studies with content focus on hallux valgus orthosis design and any of the outcomes related to effectiveness for treating hallux valgus are included. The standardized mean differences are calculated. The risk of bias in included studies is assessed using the Cochrane Collaboration's risk of bias tools.

**Results** In total, 2066 articles are identified. Among them, 9 are selected and quality rated, and data are extracted and closely examined. A meta-analysis is conducted where appropriate. The main causes of potential bias are missing outcome data and outcome measurement error. The results show that orthosis with a toe separator has the best effect of correcting the hallux valgus angle (SMD 0.50, CI 0.189,0.803).

**Conclusion** The orthoses design with a toe separator or an element that allows for the foot anatomic alignment is critical for reducing the hallux valgus angle and relieving foot pain. The results contribute to a better selection of treatment for patients.

**PROSPERO registration number** CRD42021260403

## Strengths and limitations of this study

- 1  
2  
3  This systematic review with meta-analysis represents, to the best of our knowledge, the most  
4 comprehensive examination of the evidence for the characteristics and effectiveness of orthosis in  
5 the treatment of hallux valgus.  
6  
7
- 8  
9  
10  This study searched articles in large databases including SCOPUS, MEDLINE, PubMed, and Cinahl.  
11
- 12  The results highlight the key design features of orthosis and their relevance to hallux valgus angle  
13 correction and pain relief.  
14  
15
- 16  This study provides evidence on the use of hallux valgus orthoses in angle correction and toe  
17 realignment.  
18  
19
- 20  There is scarcity of studies on this topic and lack of consistency in the study methods.  
21  
22  
23  
24  
25  
26  
27  
28  
29  
30  
31  
32  
33  
34  
35  
36  
37  
38  
39  
40  
41  
42  
43  
44  
45  
46  
47  
48  
49  
50  
51  
52  
53  
54  
55  
56  
57  
58  
59  
60

## Introduction

Hallux valgus (HV) is a common foot deformity, estimated to affect 23% of adults and 35.7% of the elderly [1]. It is characterized by the hypermobility and pronation of the first metatarsal ray, which eventually lead to subluxation and pain of the first metatarsophalangeal joint [2]. The hallux valgus angle (HVA) and intermetatarsal angle (IMA) are common indicators to objectively measure the degree of the deformity [3, 4]. HV is not only a prevalent and debilitating condition amongst the general public, especially women, due to hereditary or improper footwear but also a significant burden on public health care with the high demand for foot surgery [5], and its association with foot pain [6-9], which can inhibit the level of mobility and physical activity of those who suffer from the deformity [2]. This is especially devastating to athletes, who may acquire the condition due to prolonged periods of training. Previous research work has found that 9.3% of the Muay Thai kickboxers in their study suffer from HV [10-12]. Schöffl and Küpper [12] and Killian et al. [13] found that tight climbing shoes exert high pressure load on the forefoot which affects 53% of the long-term high-level climbers. Steinberg et al. [14] found that 40.0% dancers have bilateral HV and 7.3 % have unilateral HV. Contributors to the development of HV include the individual body structure, joint range of motion (ROM), anatomical abnormalities and extensive dance exercises that expose the spine and the lower limb joints to high loads and strains [14-16]. Former ballet dancers (73.7%) were also found to have a significantly higher HV incidence rate than the control group (2.6%) [15].

Extreme cases of HV require surgical intervention, but the recurrence rate is high. Surgical operations may reduce the subsequent mobility of the big toe, and the impact on athletes can be devastating [2]. Hence,



1 studies have shown that treatment of HV in athletes should be as conservative as possible [10]. The  
2 complications related to HV surgical correction such as nerve damage also discourage surgery [17-21].  
3  
4 Therefore, non-surgical conservative treatments such as the use of foot orthoses have become a viable and  
5  
6  
7 popular option for HV patients to correct their foot deformity and relieve foot pain [17, 22]. As described by  
8  
9 Charrette [23], HV orthoses act as a means of biomechanical support to reduce the pressure on the first  
10  
11  
12 metatarsal joint which would prevent further degeneration of mobility.  
13  
14

15  
16 HV orthoses are available in a wide range of design features and materials. Ready-made and custom-made  
17  
18 are the two main types of foot orthoses [24]. While the former is available online or in retail stores and made  
19  
20 from standard patterns, the latter are constructed by using footprints or foot molds based on specifications  
21  
22 of the clinician [25]. They may or may not have a toe separator, can have different lengths and made of  
23  
24 different materials. The design of HV orthoses is multi-factorial, however, previous related studies have  
25  
26 merely focused on the effectiveness of foot orthoses in HV patients. This article conducts a systematic study  
27  
28 to investigate the effectiveness of these orthoses, and quantitatively synthesizes the results based on the  
29  
30 best available evidence. The results can provide reference for the clinical selection and future design trends  
31  
32  
33 of orthotics to achieve better treatment effects.  
34  
35  
36  
37  
38  
39  
40  
41  
42  
43  
44  
45  
46  
47  
48  
49  
50  
51  
52  
53  
54  
55  
56  
57  
58  
59  
60

## Methods

### *Search methods for identification of studies*

Research articles published in peer-reviewed journals that describe the construction of HV orthoses and/or their effectiveness were searched on PubMed, Scopus, Cinahl and Medline for all years available up to February 2020. The PICO questions designed on the basis of the study selection criteria and a highly sensitive search strategy are reported in Figure 1. The keywords include “hallux valgus”, “orthosis”, “design”, “fabrication”, “construction”, “pressure”, “gait”, “alignment”, “pain” and “walking speed”.

### **Figure 1 PICO question and a list of search strategy**

#### *Inclusion and exclusion criteria*

The titles and abstracts were then reviewed by 2 investigators. Full-text articles that assess HV orthosis designs or any of the outcomes related to the effectiveness of HV orthoses were then retrieved for detailed evaluation. The retrieved items were screened based on a two-stage selection process which subsequently considered the titles, abstracts, and full text. Assessment of the study eligibility was performed by one investigator.

#### *Quality assessment and risk of bias*

The included papers were assessed for methodological quality. The title, journal name, and author details were removed to anonymize the articles prior to the rating process. Quality rating was performed by using the Epidemiological Appraisal Instrument (EAI) [26-29], which has been validated for the assessment of observational studies. Thirty-one items from the original EAI were used, after removing those that are related to interventions, randomization, the follow-up period, or loss to follow-up that are not applicable to

cross-sectional studies. Items were scored as “No” or “Unable to determine” (score = 0), “Partial” (score = 1), “Yes” (score = 2), or “Not Applicable” (item removed from scoring process) and an average score across all items was calculated for each study. Risk of bias was assessed with the use of Cochrane Collaboration tools.

### *Data management*

One investigator recorded the following details for all of the included papers: publication details (author, year, country, and study aim), sample characteristics (number of HV cases, number of control subjects, age and sex), study methodology (device, associated factors investigated, and orthosis wearing details) and result. The standardized mean differences (SMDs) and 95% confidence intervals (CIs) were calculated. To calculate the SMDs, the means and standard deviations (SDs) of pre-intervention and post-intervention [30]. The mean difference was divided by the pooled SD [31]. The SMDs are calculated with the following formulas:

$$1. \text{SMDs}_{\text{intervention}} = \frac{\text{Mean of pre-intervention} - \text{Mean of post-intervention}}{\text{Pooled SD for the entire population}}$$

$$2. \text{SMDs}_{\text{group}} = \frac{\text{Mean of treatment group} - \text{Mean of control group}}{\text{Pooled SD for the entire population}}$$

The interpretation of the SMDs was based on guidelines in previous studies: small effect  $\geq 0.2$ , medium effect  $\geq 0.5$ , and large effect  $\geq 0.8$  [29, 32, 33]. An SMD of "0" means that there is no difference in effect between the groups. SMDs that are "> 0" or "<0" indicate that one group is more efficacious than the other, and vice versa. SMDs are usually accompanied by 95% CIs to evaluate the reliability of the comparison [29, 32, 34].

The total variation observed across studies that is due to heterogeneity is denoted as  $I^2$ . A heterogeneity value of 0%–40% is considered “low heterogeneity”; 30%–60% is “moderate heterogeneity”; 50%–90% is “substantial heterogeneity”; and 75%–100% is “considerable heterogeneity”.

### *Patient and Public Involvement statement*

Patients and/or the public will not be involved in this study.

## **Results**

### *Search results*

This review adheres to the Preferred Reporting Items for Systematic Reviews and Meta-Analysis (PRISMA) Statement and has a registered protocol. The search strategy resulted in 2066 articles from PubMed, Scopus, Cinahl and Medline databases, with 1368 articles removed due to duplications. Then, the title and abstract of 698 articles were screened against the objective of the study, which resulted in the removal of 550 papers as they did not meet the requirements of the study design. The remaining 148 articles were assessed against the inclusion and exclusion criteria by examining the full text and were imported into the VOSviewer (version 1.6.13) to examine the trend of the results. Keywords with fewer than 3 occurrences were excluded, and general terms were filtered out so that the focus would be on more specific and informative terms [35]. Figure II (a) visualizes the results that amongst the 148 remaining articles, 18 keywords meet the threshold. The total link strength ranged from 26 to 71, with larger label denoting a higher total link strength. On average, the publication years of the articles ranged from 2010 to 2015, in which “male”, “patient satisfaction”, “foot orthoses” and “hallux valgus-therapy” are the latest research terms. After the assessment, another 89 articles were removed. The remaining 9 studies are discussed in this systematic review. Figure II (b) presents a PRISMA flow chart of the article selection process.

1  
2  
3 **Figure II (a) Visualization of main keywords from 148 papers, and (b) Flowchart of study selection**  
4  
5 **procedure**  
6  
7  
8  
9

10 *Study characteristics*  
11

12 The 9 studies selected for inclusion in this paper focused on various characteristics and included different  
13 demographics (Table I). Of the nine studies included, seven were randomized controlled trials [36-40, 41-  
14 42], and the others were uncontrolled intervention study [42] and quasi-experimental [22], respectively. The  
15 age of participants ranged from  $22.79 \pm 1.44$  to  $60.8 \pm 10.8$  years old. The publication years of these papers  
16 range from 2002 to 2020. The studies evaluated the effects of 11 different types of HV orthoses on angle  
17 correction (IMA and HVA), plantar pressure, ROM, pain (Visual Analogue Scale (VAS) and Foot and Ankle  
18 Outcome Score (FAOS) -pain), function during daily activities (the American Orthopedic Foot and Ankle Score  
19 (AOFAS) and FAOS -function) and quality of life (FAOS -quality of life). The number of subjects who suffer  
20 from HV ranged from 16 to 69, with mild to moderate HV. Four of the studies involved control groups with  
21 23 to 69 participants. Overall, the majority of the subjects are female.  
22  
23  
24  
25  
26  
27  
28  
29  
30  
31  
32  
33  
34  
35  
36  
37  
38  
39  
40  
41  
42  
43  
44  
45  
46  
47  
48  
49  
50  
51  
52  
53  
54  
55  
56  
57  
58  
59  
60

Table I Selected characteristics of studies included in analysis (9 unique studies)

| Authors(s)/ Country                        | Reference No. | Study aim                                                                                                                       | Method/ Device                                                                  | N HV | Age (Mean $\pm$ SD)                                            | Orthosis                                                              | Orthosis material/ Wearing duration                                                                         | Result                                                                                                                                                                                                    |
|--------------------------------------------|---------------|---------------------------------------------------------------------------------------------------------------------------------|---------------------------------------------------------------------------------|------|----------------------------------------------------------------|-----------------------------------------------------------------------|-------------------------------------------------------------------------------------------------------------|-----------------------------------------------------------------------------------------------------------------------------------------------------------------------------------------------------------|
| Chadchavalpa nichaya et al. 2018/ Thailand | [36]          | To investigate the effect of custom-molded room temperature vulcanizing (RTV) silicone toe separator to reduce HVA              | Randomized controlled trial/ Radiographic measurement & clinical assessment     | 45   | HV group: 60.3 $\pm$ 9.4<br>Control group: 60.8 $\pm$ 10.8     | Custom-molded RTV toe separator                                       | Silicone/ 12 months                                                                                         | Both groups have significant differences in mean HVA with a decrease of 3.3° $\pm$ 2.4° for the study group and increase of 1.9° $\pm$ 1.9° for the control group. Hallux pain of study group is reduced. |
| Doty et al. 2015/ USA                      | [37]          | To compare the plantar pressure distribution in standard footwear and in the same footwear with orthoses of 3 different lengths | Randomized controlled trial/ Tactilus Free Form® Sensor System                  | 25   | Mean: 57                                                       | Full-length orthosis<br>Sulcus-length orthosis<br>3/4-length orthosis | NR/ Immediate                                                                                               | No significant changes in medial pressure with the addition of any orthosis compared with standard footwear alone                                                                                         |
| Farzadi et al. 2015/ Iran                  | [22]          | To investigate the effect of orthosis with medial arch support on plantar pressure distribution                                 | Quasi-experimental / Pedar-X® in-shoe system                                    | 16   | 26.1 $\pm$ 5.7                                                 | Prefabricate d arch support foot orthosis                             | 5 mm thick polypropylene/ 1 month                                                                           | The use of the foot orthosis leads to a decrease in peak pressure & maximum force                                                                                                                         |
| Moulodi et al. 2019/ Iran                  | [38]          | To compare the HVA, ROM, FAOS, pain & function in daily activities after the use of orthosis                                    | Randomized controlled trial/ clinical assessment                                | 24   | 22.79 $\pm$ 1.44                                               | Static orthosis with toe separator<br>Dynamic orthosis                | A bar & a single strap/ 1 month<br>Firm plastic, straps & a free joint/ 1 month                             | Both orthoses can reduce HVA up to 3°; significant difference in ROM by using dynamic orthosis                                                                                                            |
| Plaass et al. 2020/ Germany                | [39]          | To analyze the effect of a dynamic orthosis on IMA & HVA                                                                        | Randomized controlled trial/ Radiographic measurement & clinical assessment     | 36   | HV group: 53.2 $\pm$ 14.0<br>Control group: 48.5 $\pm$ 12.9    | Dynamic orthosis                                                      | NR/ 3 months                                                                                                | Dynamic orthosis can provide pain relief in patients but showed no effect on HVA                                                                                                                          |
| Reina et al. 2013/ Spain                   | [40]          | To determine if the use of custom-made foot orthotics prevents the advancement of IMA & HVA                                     | Randomized controlled trial/ Radiographic measurement                           | 23   | HV group: 30.31 $\pm$ 9.27<br>Control group: 30.94 $\pm$ 14.06 | Custom-made foot orthoses                                             | 3 mm thick polypropylene sheet & 3 mm thick polyethylene foam sheet/ 12 months                              | Custom-made orthoses appear to have no effect                                                                                                                                                             |
| Tang et al. 2002/ Taiwan                   | [43]          | To assess the effects of a new foot-toe orthosis on HVA                                                                         | Uncontrolled intervention study/ Radiographic measurement & clinical assessment | 17   | 42.59 $\pm$ 16.52                                              | Total contact orthosis with toe separator                             | Plastazote poron, microcell pull, plastazote & mineral oil-based polymer gel toe separator/ 3 months        | The new total contact orthosis with fixed toe separator reduces HVA                                                                                                                                       |
| Tehraninasr et al. 2008/ Iran              | [41]          | To compare the effects of wearing an orthosis with toe separator & nighttime orthosis on IMA, HVA & foot pain                   | Randomized controlled trial/ Radiographic measurement                           | 30   | 27 $\pm$ 8.91                                                  | Orthosis with toe separator<br>Nighttime orthosis                     | Polyfoam, polyethylene, plastazote toe separator/ 3 months<br>Polyfoam & a rigid polyethylene bar/ 3 months | IMA & HVA are reduced in both groups; however, the reduction is not significant; the orthosis with toe separator significantly reduces the pain intensity                                                 |
| Torkki et al. 2003/ Finland                | [42]          | To compare the effectiveness of surgical & orthotic treatment with patients on VAS                                              | Randomized controlled trial/ NR                                                 | 69   | HV group: 49 $\pm$ 10<br>Control group: 47 $\pm$ 9             | NR                                                                    | NR/ 12 months                                                                                               | Orthoses provide short-term symptomatic relief                                                                                                                                                            |

### *Quality assessment and risk of bias*

The inter-rater agreement on the EAI is 95% (14 disagreements out of 279 quality assessment items rated) across all included studies (9 papers). The individual study results for quality appraisal are shown in Table II. All of the studies defined the associated factors investigated and reported the sampling frame and statistical methods (9/9, 100%). Most studies clearly reported their aims and study design (8/9, 89%). More than half of the studies reported the inclusion criteria, sample characteristics, sample size calculations and statistical parameters (7/9, 78%; 6/9, 67%; 7/9, 78%; and 7/9, 78%, respectively). Few studies reported an attempt to blind the assessors towards the group allocation (1/4, 25%), although given the nature of HV deformities, blinding assessors is unlikely to be possible in most studies.

Reliability and validity were considered separately for both the HV assessment and measurement of the associated factors. Only a couple of the studies (2/9; 22%) provided a clear definition of HV by reporting angle values, another couple of studies (2/9; 22%) reported the reliability for the HV angle assessment, and only 11% (1/9) reported the validity of the HV assessment. The risk of bias of the included studies is summarized in Figure III. The main causes of potential bias were missing outcome data and outcome measurement error.

Table II Results of quality assessment of all included papers (9 unique studies) <sup>a</sup>

| Author(s)                                               | Chadchaval panichaya et al. 2018 | Doty et al. 2015 | Farzadi et al. 2015 | Moulodi et al. 2019 | Plaass et al. 2020 | Reina et al. 2013 | Tang et al. 2002 | Tehrana niasr et al. 2008 | Torkki et al. 2003 | Studies scoring "Yes" (%) |
|---------------------------------------------------------|----------------------------------|------------------|---------------------|---------------------|--------------------|-------------------|------------------|---------------------------|--------------------|---------------------------|
| Reference No.                                           | [36]                             | [37]             | [22]                | [38]                | [39]               | [40]              | [43]             | [41]                      | [42]               |                           |
| Q1. Reported study aim/objective clearly                | 2                                | 2                | 2                   | 2                   | 2                  | 2                 | 2                | 2                         | 1                  | 89                        |
| Q2. Associated factors clearly defined                  | 2                                | 2                | 2                   | 2                   | 2                  | 2                 | 2                | 2                         | 2                  | 100                       |
| Q3. HV clearly defined                                  | 1                                | 2                | 1                   | 0                   | 0                  | 0                 | 0                | 2                         | 0                  | 22                        |
| Q4. Reported study design                               | 2                                | 2                | 2                   | 2                   | 2                  | 2                 | 2                | 1                         | 2                  | 89                        |
| Q5. Reported sampling frame                             | 2                                | 2                | 2                   | 2                   | 2                  | 2                 | 2                | 2                         | 2                  | 100                       |
| Q6. Reported inclusion criteria                         | 2                                | 0                | 2                   | 2                   | 2                  | 2                 | 2                | 2                         | 0                  | 78                        |
| Q7. Reported participation rate                         | 2                                | 0                | 0                   | 2                   | 1                  | 2                 | 1                | 0                         | 2                  | 44                        |
| Q8. Reported sample characteristics                     | 2                                | 2                | 1                   | 1                   | 2                  | 2                 | 2                | 1                         | 2                  | 67                        |
| Q9. Reported statistical methods                        | 2                                | 2                | 2                   | 2                   | 2                  | 2                 | 2                | 2                         | 2                  | 100                       |
| Q10. Reported all basic data                            | 0                                | 0                | 0                   | 0                   | 0                  | 0                 | 2                | 0                         | 0                  | 11                        |
| Q11. Reported variability in data                       | 2                                | 0                | 2                   | 2                   | 2                  | 2                 | 0                | 2                         | 2                  | 78                        |
| Q12. Reported statistical parameters                    | 2                                | 2                | 2                   | 2                   | 2                  | 2                 | 1                | 1                         | 2                  | 78                        |
| Q13. Sample size calculations                           | 2                                | 1                | 2                   | 2                   | 2                  | 2                 | 1                | 2                         | 2                  | 78                        |
| Q14. Comparability of case/control groups               | 2                                | -                | -                   | -                   | 2                  | 2                 | -                | -                         | 2                  | 100                       |
| Q15. Adequate participation rate                        | 2                                | 2                | 2                   | 2                   | 2                  | 2                 | 2                | 2                         | 2                  | 100                       |
| Q16. Recruitment period for case/control groups         | 2                                | -                | -                   | -                   | 2                  | 2                 | -                | -                         | 0                  | 75                        |
| Q17. Non-responder characteristics described            | 0                                | 0                | 0                   | 0                   | 0                  | 0                 | 0                | 0                         | 0                  | 0                         |
| Q18. Reliability of all associated factors              | 2                                | 0                | 1                   | 2                   | 0                  | 0                 | 0                | 0                         | 0                  | 22                        |
| Q19. Validity of all associated factors                 | 0                                | 0                | 0                   | 2                   | 0                  | 0                 | 0                | 0                         | 0                  | 11                        |
| Q20. Standardized assessment of associated factors      | 2                                | 2                | 2                   | 2                   | 2                  | 2                 | 2                | 2                         | 2                  | 100                       |
| Q21. Blinding of assessors                              | 2                                | -                | -                   | -                   | 1                  | 0                 | -                | -                         | 0                  | 25                        |
| Q22. Reliability of HV assessment                       | 2                                | 0                | 0                   | 2                   | 0                  | 0                 | 0                | 0                         | 0                  | 22                        |
| Q23. Validity of HV assessment                          | 0                                | 0                | 0                   | 2                   | 0                  | 0                 | 0                | 0                         | 0                  | 11                        |
| Q24. Standardized assessment of HV                      | 2                                | 0                | 0                   | 0                   | 2                  | 2                 | 2                | 2                         | 0                  | 56                        |
| Q25. Assessment period for case/control groups          | 2                                | -                | -                   | -                   | 2                  | 2                 | -                | -                         |                    | 100                       |
| Q26. Collected data on HV severity/symptoms             | 2                                | 0                | 0                   | 0                   | 2                  | 1                 | 1                | 1                         | 1                  | 22                        |
| Q27. Adjusted for covariates                            | 0                                | 0                | 0                   | 0                   | 0                  | 0                 | 0                | 0                         | 0                  | 0                         |
| Q28. Reported data for ≥ 3 levels of associated factors | 0                                | 2                | 0                   | 0                   | 0                  | 0                 | 0                | 0                         | 2                  | 2                         |
| Q29. Reported data for subgroups of subjects            | 0                                | 0                | 0                   | 0                   | 0                  | 0                 | 0                | 0                         | 0                  | 0                         |
| Q30. Generalizability of results to study population    | 0                                | 1                | 0                   | 0                   | 0                  | 0                 | 0                | 0                         | 1                  | 0                         |
| Q31. Generalizability of results to other populations   | 2                                | 0                | 0                   | 0                   | 2                  | 0                 | 0                | 2                         | 2                  | 44                        |
| Overall quality score                                   | 1.45                             | 0.89             | 0.93                | 1.22                | 1.23               | 1.13              | 0.96             | 1.07                      | 1.06               |                           |



<sup>a</sup> Purple shading = “Yes”, Blue shading = “Partial”, White shading = “No” or “Unable to determine”, “-” = “Not applicable”; that is, items removed from scoring process and not included in % calculations.

### Figure III Risk of bias in included studies (a) risk of bias for randomized studies, (b) risk of bias for non-randomized studies

#### *Overview of results from meta-analyses*

Figure IV provides the overall SMDs and SMDs for individual studies in which eight measurement factors before and after intervention in the HV group are compared. The primary function of HV orthosis is to correct the HVA, and a total of six studies investigated the effect of orthosis on the HVA correction. A small effect for HV orthosis in correcting HVA was found (SMD 0.31, CI 0.075, 0.547) with  $I^2$  28.28%. Tang et al. [43] stated that their full-length orthosis with a toe separator provides a significantly positive reduction of the HVA of 5.79° in the HV group (SMD 0.85, CI 0.121, 1.546), which has the highest corrective effect among all the recorded orthoses. The static orthosis with a toe separator tested by Moulodi et al. [38] also showed a significant positive HVA correction of 2.67° in the HV group (SMD 0.75, CI 0.143, 1.325). Chadchavalpanichaya et al. [36] developed a custom-molded RTV toe separator, which helps to correct the HVA by 2.1° in the HV group (SMD 0.41, CI -0.012, 0.827). The pooled estimation for orthoses with a toe separator was further investigated that the effect is medium (SMD 0.50, CI 0.189, 0.803) with  $I^2$  14.52%. The dynamic orthosis tested also showed a significantly positive reduction of the HVA of 2.13° (SMD 0.55, CI -0.038, 1.127) [38]. The pooled estimation for dynamic orthoses showed small effect in HVA correction (SMD 0.27, CI -0.211, 0.751) with  $I^2$  42.29%.

Three of the studies investigated the pain score with the use of two different types of rating scales. One of them, Tehraninasr et al. [41], showed that their orthosis with a toe separator can significantly reduce the pain level (SMD 1.13, CI 0.319, 1.887). The level of physical functioning before and after the application of an

1 orthosis have also been compared. A small effect (SMD -0.30, CI -0.700,0.102) was achieved.  
2  
3

4 Two other studies investigated the impact of the foot orthosis on plantar pressure. Small effect for HV  
5  
6 orthosis in plantar pressure reduction was found (SMD 0.41, CI 0.118, 0.700) with  $I^2$  0.00%. It was found that  
7  
8 the prefabricated full-length orthosis with an arch support [22] can significantly reduce the plantar pressure  
9  
10 by 16.8 kPa (SMD 0.65, CI -0.090,1.354).  
11  
12  
13  
14  
15  
16  
17  
18

### 19 *Observation of key design features*

#### 22 ***Customized vs. prefabricated***

23  
24  
25  
26 Among the orthoses that showed a significant reduction of the HVA after treatment amongst the HV patients,  
27  
28 the orthoses developed by Chadchavalpanichaya et al. [36] and Tang et al. [43] are custom-made, while  
29  
30 those in Moulodi et al. [38], Tehraninasr et al. [41], Torkki et al. [42], Doty et al. [37] and Farzadi et al. [22]  
31  
32 are prefabricated. This shows that the ability of an orthosis to reduce the severity of HV or its treatment  
33  
34 effectiveness might not be related to whether it is customized or prefabricated. However, adjustment and  
35  
36 fitting are still key factors, and patients are instructed to adjust the prefabricated orthosis to the best fitting  
37  
38 position [39].  
39  
40  
41  
42  
43

#### 44 ***Static vs. dynamic***

45  
46  
47 In terms of HVA reduction, the results are consistent with those of the HV patients before and after the  
48  
49 intervention. Both types of orthoses have a positive effect on treatment effectiveness, whilst all of the static  
50  
51 orthoses that help to reduce the HVA are embedded with the feature of toe separator. Therefore, the toe  
52  
53 separator seems to be the key element in correcting the misalignment of the big toe.  
54  
55  
56  
57

#### 58 ***Considerations around orthosis length and arch support***

1 In terms of the orthosis length, the full-length orthosis in Tang et al. [43] has a significant and exceptional  
2 corrective effect of HV in the HV group. The full-length orthoses with arch support in Farzadi et al. [22] can  
3 significantly reduce the plantar pressure. These results show that when considering the length of the orthosis  
4 for HV patients, full-length is preferred, and arch support may be important to achieve therapeutic effects.  
5  
6  
7  
8  
9

#### 14 **Figure IV Comparison of observations<sup>a</sup>**

#### 18 **Discussion**

21 This is the first study to systematically evaluate and synthesize results from the extensive pool of literature  
22 that investigates the characteristics of HV orthoses and their effects on different factors. The data obtained  
23 from meta-analysis suggest that dynamic orthoses, and static orthoses with a toe separator help to reduce  
24 the HVA by approximately 2.1° to 5.79° among HV patients [36, 38, 43]. The treatment effect of orthoses  
25 with a toe separator on HVA correction is larger than that of dynamic orthoses. The full-length orthosis with  
26 toe separator developed by Tang et al. [43] has a significant and exceptional HVA correction effect. The use  
27 of orthoses with a toe separator for moderate degree HV patients can reduce HVA and hallux pain without  
28 serious complications [36, 41]. The studies also showed that the toe separator can greatly alleviate pain by  
29 better aligning the big toe and relieving the overstretched collateral ligaments and bone subluxation [43,  
30 41]. However, due to the ease of use, fit and better appearance, users may more satisfied with dynamic than  
31 static orthoses [38]. The dynamic orthoses can reduce the contracture of the first metatarsophalangeal joint  
32 and better align the big toe through low torque and prolonged stretching [36, 44, 45]. The freedom of joint  
33 movement does not limit the ROM of the big toe, but help to maintain joint mobility and prevent joint  
34 stiffness, which seem to have a beneficial effect on the treatment of HV [38].  
35  
36  
37  
38  
39  
40  
41  
42  
43  
44  
45  
46  
47  
48  
49  
50  
51  
52  
53  
54

56 The full-length orthoses with an arch support tested by Farzadi et al. [22] help to reduce the plantar pressure  
57 and forefoot pain significantly. It can be suggested that forefoot pain has an evident relationship with plantar  
58  
59

1 pressure in the metatarsalgia region [24, 46, 47]. This might be associated with better body load distribution  
2  
3 by relieving the excessive pressure on the forefoot through metatarsal unloading. By maximizing the total  
4  
5 contact area of the foot with a full-length orthosis, the peak plantar pressure can be reduced by 30% to 40%  
6  
7 [48, 49]. In addition, with adequate arch support, the anatomical alignment of the foot can be restored  
8  
9 correctly [41].  
10  
11  
12

13 Both customized and prefabricated orthoses can significantly reduce the symptoms of HV. Ring and Otter  
14  
15 [50] compared the clinical efficacy of casted foot orthoses and prefabricated foot orthoses in the treatment  
16  
17 of plantar heel pain in 67 patients, and found no significant difference in effectiveness between the bespoke  
18  
19 or prefabricated orthoses. In addition, compared to the average cost of bespoke devices, the prefabricated  
20  
21 orthoses are 38% less expensive per patient. They concluded that prefabricated orthoses could provide  
22  
23 benefits that are equivalent to those of casted foot orthoses, but at considerably reduced costs. Since the  
24  
25 material properties, thickness, and rigidity of the orthoses studied remain unknown. No conclusion can be  
26  
27 made on the best material for HVA reduction. However, Chadchavalpanichaya et al. [36] found that an RTV  
28  
29 silicone toe separator is comfortable to wear. Its compliance with treatment is higher than that of the  
30  
31 nighttime HV strap [36]. The cost of a toe separator made of RTV silicone is only one-tenth of that of medical  
32  
33 grade silicone, which can be considered as a clinical and cost-effective option [36].  
34  
35  
36  
37  
38  
39  
40

41 Torkki et al. [18] pointed out that an orthosis can provide short-term symptomatic relief. However, the  
42  
43 wearing duration of the three orthoses in their study ranges from 1 month to 1 year. This may show that  
44  
45 orthoses with a toe separator help to reduce the HVA not only for a short period of time but also on a  
46  
47 continuous basis. Moreover, the angle reduction did not increase with treatment duration, which may  
48  
49 indicate that the treatment reaches its equilibrium result at a certain point of time.  
50  
51  
52  
53  
54  
55  
56

## 57 **Conclusion**

58  
59 Foot orthoses can be an acceptable treatment option to reduce HV deformity. This systematic review  
60

1 demonstrates a positive relationship between HVA reduction and pain level with orthoses that offer a toe  
2 separator. Therefore, it is important to include this element in the conservative treatment of HV deformity,  
3 as well as the future development of HV orthoses. It is recommended that a fixed toe separator or a dynamic  
4 orthosis is used to maintain the anatomic alignment of the big toe for those who suffer from HV. The results  
5 of this study provide patients, practitioners and physicians with important information to help them better  
6 understand the characteristics of various HV orthoses and their performance in reducing HV deformity, and  
7 contribute to decisions around optimal treatment for patients.  
8  
9  
10  
11  
12  
13  
14  
15  
16  
17  
18  
19

### 20 **Strengths and limitations**

21  
22 As with any systematic review or meta-analysis, the strength of these results relies on the quality of the  
23 studies included. The limitations of this study include the scarcity of studies found on this topic in the  
24 literature, lack of consistency in the various study methods, subjects' conditions, and limited consideration  
25 of the reliability and validity of the HV assessments in the included studies. Only a few randomized controlled  
26 trials are compared and reported in this study and there is limited information on the materials of the  
27 orthotics studied. More randomized controlled trials related to HV orthoses are needed, and more research  
28 on the material properties of HV orthoses is also required, in order to offer an effective solution for effective  
29 and optimal designs of HV orthoses.  
30  
31  
32  
33  
34  
35  
36  
37  
38  
39  
40  
41  
42  
43

44 **Contributors** M-YK conceived and wrote this systematic review with meta-analysis. K-LY, JY and C-YT  
45 reviewed the protocol and provided extensive feedback. All authors approved the final manuscript.  
46  
47  
48

49 **Funding** The authors would like to acknowledge the Departmental Grant of Institute of Textiles and Clothing,  
50 The Hong Kong Polytechnic University (grant number PolyU RHRM) for funding this project  
51  
52  
53

54 **Competing interests** None declared.  
55

56 **Patient consent** Not required.  
57

58 **Provenance and peer review** Not commissioned; externally peer reviewed.  
59  
60

**Data sharing statement** All data relevant to the study are included in the article or uploaded as supplementary information. No additional data are available.

**Ethics statement** Not applicable/No human participants included.

For peer review only

1  
2  
3  
4  
5  
6  
7  
8  
9  
10  
11  
12  
13  
14  
15  
16  
17  
18  
19  
20  
21  
22  
23  
24  
25  
26  
27  
28  
29  
30  
31  
32  
33  
34  
35  
36  
37  
38  
39  
40  
41  
42  
43  
44  
45  
46  
47  
48  
49  
50  
51  
52  
53  
54  
55  
56  
57  
58  
59  
60

## References

1. Nix, S., M. Smith, and B. Vicenzino, *Prevalence of hallux valgus in the general population: a systematic review and meta-analysis*. Journal of Foot and Ankle Research, 2010. **3**(1): p. 21-21.
2. Fournier, M., A. Saxena, and N. Maffulli, *Hallux Valgus Surgery in the Athlete: Current Evidence*. The Journal of Foot & Ankle Surgery, 2019. **58**(4): p. 641-643.
3. Hardy, R.H. and J.C.R. Clapham, *Observations on hallux valgus*. Journal of bone and joint surgery, 1951. **33-B**(3): p. 376-391.
4. Piqué-Vidal, C. and J. Vila, *A geometric analysis of hallux valgus: correlation with clinical assessment of severity*. Journal of Foot and Ankle Research, 2009. **2**(1): p. 15-15.
5. Meyr, A.J.D.P.M., et al., *Epidemiological Aspects of the Surgical Correction of Structural Forefoot Pathology*. Journal of Foot and Ankle Surgery, 2009. **48**(5): p. 543-551.
6. Abhishek, A., et al., *Are hallux valgus and big toe pain associated with impaired quality of life? A cross-sectional study*. Osteoarthritis Cartilage, 2010. **18**(7): p. 923-926.
7. Cho, N.H., et al., *The prevalence of hallux valgus and its association with foot pain and function in a rural Korean community*. The Journal of Bone and Joint Surgery, 2009. **91-B**(4): p. 494-498.
8. Menz, H.B., et al., *Impact of hallux valgus severity on general and foot-specific health-related quality of life*. Arthritis Care & Research, 2010. **63**(3).
9. Roddy, E., W. Zhang, and M. Doherty, *Prevalence and associations of hallux valgus in a primary care population*. Arthritis Rheum, 2008. **59**(6): p. 857-862.
10. Hunt, K.J., J.J. McCormick, and R.B. Anderson, *Management of forefoot injuries in the athlete*. Operative Techniques in Sports Medicine, 2010. **18**(1): p. 34-45.
11. Vaseenon, T., et al., *Foot and ankle problems in Muay Thai kickboxers*. Journal of the Medical Association of Thailand, 2015. **98**(1): p. 65-70.
12. Schöffl, V. and T. Küpper, *Feet injuries in rock climbers*. World Journal of Orthopedics, 2013. **4**(4): p. 218.
13. Killian, R.B., G.S. Nishimoto, and J.C. Page, *Foot and ankle injuries related to rock climbing. The role of footwear*. Journal of the American Podiatric Medical Association, 1998. **88**(8): p. 365-374.
14. Steinberg, N., et al., *The association between hallux valgus and proximal joint alignment in young female dancers*. International journal of sports medicine, 2015. **36**(01): p. 67-74.
15. Niek van Dijk, C., et al., *Degenerative Joint Disease in Female Ballet Dancers*. The American Journal of Sports Medicine, 2016. **23**(3): p. 295-300.
16. Steinberg, N., et al., *Morphological characteristics of the young scoliotic dancer*. Physical Therapy in Sport, 2013. **14**(4): p. 213-220.
17. du Plessis, M., et al., *Manual and manipulative therapy compared to night splint for symptomatic hallux abducto valgus: An exploratory randomised clinical trial*. Foot, 2010. **21**(2): p. 71-78.
18. Torkki, M., et al., *Surgery vs orthosis vs watchful waiting for hallux valgus: A randomized controlled trial*. Journal of the American Medical Association, 2001. **285**(19): p. 2474-2480.
19. Coetzee, J., *Scarf Osteotomy for Hallux Valgus Repair: The Dark Side*. Foot & ankle international, 2003. **24**.
20. Sammarco, G.J. and O.B. Idusuyi, *Complications after surgery of the hallux*. Clinical Orthopaedics and Related Research, 2001. **391**: p. 59-71.
21. Jahss, M.H., *Disorders of the foot & ankle : medical and surgical management*. 2nd ed.. ed. 1991, Philadelphia: Philadelphia : Saunders.
22. Farzadi, M., et al., *Effect of medial arch support foot orthosis on plantar pressure distribution in females with mild-to-moderate hallux valgus after one month of follow-up*. Prosthetics and Orthotics International, 2015. **39**(2): p. 1-6.
23. Charrette, M., *Bunion Formation and Orthotic Support*. Dynamic Chiropractic, 2009. **2**(2): p. 1-3.
24. Arias-Martín, I., M. Reina-Bueno, and P.V. Munuera-Martínez, *Effectiveness of custom-made foot*



- 1  
2  
3  
4  
5  
6  
7  
8  
9  
10  
11  
12  
13  
14  
15  
16  
17  
18  
19  
20  
21  
22  
23  
24  
25  
26  
27  
28  
29  
30  
31  
32  
33  
34  
35  
36  
37  
38  
39  
40  
41  
42  
43  
44  
45  
46  
47  
48  
49  
50  
51  
52  
53  
54  
55  
56  
57  
58  
59  
60
- orthoses for treating forefoot pain: a systematic review*. International Orthopaedics, 2018. **42**(8): p. 1865-1875.
25. Hawke, F., et al., *Custom foot orthoses for the treatment of foot pain: a systematic review*. Journal of foot and ankle research, 2008. **1**(S1): p. O46-O46.
26. Genaidy, A.M. and G.K. LeMasters, *The epidemiological appraisal instrument (EAI): a brief overview*. Theoretical Issues in Ergonomics Science, 2006. **7**(3): p. 187-189.
27. Genaidy, A.M., *Cancer risk among firefighters : epidemiological evidence*. 2004, University of Cincinnati.
28. Genaidy, A.M., et al., *An epidemiological appraisal instrument - a tool for evaluation of epidemiological studies*. Ergonomics, 2007. **50**(6): p. 920-960.
29. Faraone, S.V., *Interpreting estimates of treatment effects: implications for managed care*. P&T, 2008. **33**(12): p. 700-711.
30. Durlak, J.A., *How to select, calculate, and interpret effect sizes*. Journal of pediatric psychology, 2009. **34**(9): p. 917-928.
31. Deeks, J.J., J.P.T. Higgins, and D.G. Altman, *Analysing Data and Undertaking Meta-Analyses*. 2008, John Wiley & Sons, Ltd: Chichester, UK. p. 243-296.
32. McGough, J.J. and S.V. Faraone, *Estimating the size of treatment effects: moving beyond p values*. Psychiatry, 2009. **6**(10): p. 21.
33. Cohen, J., *Statistical power analysis for the behavioral sciences*. 2nd ed. 1988, Hillsdale, N.J.: L. Erlbaum Associates.
34. Faraone, S., *Understanding the effect size of ADHD medications: implications for clinical care*. Medscape Psychiatry & Mental Health, 2003. **8**(2).
35. Van Eck, N.J. and L. Waltman, *Software survey: VOSviewer, a computer program for bibliometric mapping*. Scientometrics, 2010. **84**(2): p. 523-538.
36. Chadchavalpanichaya, N., et al., *Effectiveness of the custom-mold room temperature vulcanizing silicone toe separator on hallux valgus: A prospective, randomized single-blinded controlled trial*. Prosthetics and Orthotics International, 2018. **42**(2): p. 163-170.
37. Doty, J.F., et al., *Biomechanical Evaluation of Custom Foot Orthoses for Hallux Valgus Deformity*. Journal of Foot and Ankle Surgery, 2015. **54**(5): p. 852-855.
38. Moulodi, N., M. Kamyab, and M. Farzadi, *A comparison of the hallux valgus angle, range of motion, and patient satisfaction after use of dynamic and static orthoses*. Foot, 2019. **41**: p. 6-11.
39. Plaass, C., et al., *Short term results of dynamic splinting for hallux valgus — A prospective randomized study*. Foot and Ankle Surgery, 2020.
40. Reina, M., G. Lafuente, and P.V. Munuera, *Effect of custom-made foot orthoses in female hallux valgus after one-year follow up*. Prosthetics and Orthotics International, 2013. **37**(2): p. 113-119.
41. Tehraninasr, A., et al., *Effects of insole with toe-separator and night splint on patients with painful hallux valgus: A comparative study*. Prosthetics and Orthotics International, 2008. **32**(1): p. 79-83.
42. Torkki, M., et al., *Hallux valgus: immediate operation versus 1 year of waiting with or without orthoses: a randomized controlled trial of 209 patients*. Acta Orthopaedica Scandinavica, 2003. **74**(2): p. 209-215.
43. Tang, S.F., et al., *The effects of a new foot-toe orthosis in treating painful hallux valgus*. Archives of Physical Medicine and Rehabilitation, 2002. **83**(12): p. 1792-1795.
44. Nicholas, J., *Rehabilitation of patients with rheumatic disorders*. Physical medicine and rehabilitation, 1996: p. 711-727.
45. John, M.M., *Dynamic splinting for hallux valgus and hallux varus: a pilot study*. The Foot and Ankle Online Journal, 2009.
46. Postema, K., et al., *Primary metatarsalgia: the influence of a custom moulded insole and a rockerbar on plantar pressure*. Prosthetics and Orthotics International, 1998. **22**(1): p. 35-44.
47. Kelly, A. and I. Winson, *Use of ready-made insoles in the treatment of lesser metatarsalgia: a*



- 1  
2  
3  
4  
5  
6  
7  
8  
9  
10  
11  
12  
13  
14  
15  
16  
17  
18  
19  
20  
21  
22  
23  
24  
25  
26  
27  
28  
29  
30  
31  
32  
33  
34  
35  
36  
37  
38  
39  
40  
41  
42  
43  
44  
45  
46  
47  
48  
49  
50  
51  
52  
53  
54  
55  
56  
57  
58  
59  
60
- prospective randomized controlled trial. *Foot & ankle international*, 1998. **19**(4): p. 217-220.
48. Nouman, M., W. Leelasamran, and S. Chatpun, *Effectiveness of total contact orthosis for plantar pressure redistribution in neuropathic diabetic patients during different walking activities*. *Foot & Ankle International*, 2017. **38**(8): p. 901-908.
49. Kitaoka, H.B., et al., *Effect of foot orthoses on 3-dimensional kinematics of flatfoot: a cadaveric study*. *Archives of Physical Medicine and Rehabilitation*, 2002. **83**(6): p. 876-879.
50. Ring, K. and S. Otter, *Clinical Efficacy and Cost-Effectiveness of Bespoke and Prefabricated Foot Orthoses for Plantar Heel Pain: A Prospective Cohort Study*. *Musculoskeletal care*, 2014. **12**(1): p. 1-10.

For peer review only

**Figure legends**

Figure I PICO question and a list of search strategy

Figure II (a) Visualization of main keywords from 148 papers, and (b) Flowchart of study selection procedure

Figure III Risk of bias in included studies (a) risk of bias for randomized studies, (b) risk of bias for non-randomized studies

Figure IV Comparison of observations <sup>a</sup>

For peer review only

| PICO question   |                                                                                                                                           |                                                                                                                          |
|-----------------|-------------------------------------------------------------------------------------------------------------------------------------------|--------------------------------------------------------------------------------------------------------------------------|
| P               | Population or Problem                                                                                                                     | Studies that included people with hallux valgus, and people without hallux valgus at baseline were included              |
| I               | Intervention                                                                                                                              | Randomized controlled trial, uncontrolled intervention study and quasi-experimental of the use of hallux valgus orthoses |
| C               | Comparison or control                                                                                                                     | The comparison could be no hallux valgus orthotic treatment, or other orthotic designs                                   |
| O               | Outcome                                                                                                                                   | Any effect of hallux valgus orthotic treatment                                                                           |
| Search strategy |                                                                                                                                           |                                                                                                                          |
| 1.              | ("Hallux Valgus" AND (Design OR Fabrication OR Construction)) NOT (Implant OR Replacement)                                                |                                                                                                                          |
| 2.              | ("Hallux Valgus" AND (Orthoses OR Orthosis) AND (Design OR Fabrication OR Construction)) NOT (Implant OR Replacement)                     |                                                                                                                          |
| 3.              | ("Hallux Valgus" AND (Orthoses OR Orthosis) AND Pressure) NOT (Implant OR Replacement)                                                    |                                                                                                                          |
| 4.              | ("Hallux Valgus" AND (Orthoses OR Orthosis) AND Gait) NOT (Implant OR Replacement)                                                        |                                                                                                                          |
| 5.              | ("Hallux Valgus" AND (Orthoses OR Orthosis) AND Alignment) NOT (Implant OR Replacement)                                                   |                                                                                                                          |
| 6.              | ("Hallux Valgus" AND (Orthoses OR Orthosis) AND Pain) NOT (Implant OR Replacement)                                                        |                                                                                                                          |
| 7.              | ("Hallux Valgus" AND (Orthoses OR Orthosis) AND "Walking speed") NOT (Implant OR Replacement)                                             |                                                                                                                          |
| 8.              | ("Hallux Valgus" AND (Orthoses OR Orthosis) AND (Design OR Fabrication OR Construction) AND Pressure) NOT (Implant OR Replacement)        |                                                                                                                          |
| 9.              | ("Hallux Valgus" AND (Orthoses OR Orthosis) AND (Design OR Fabrication OR Construction) AND Gait) NOT (Implant OR Replacement)            |                                                                                                                          |
| 10.             | ("Hallux Valgus" AND (Orthoses OR Orthosis) AND (Design OR Fabrication OR Construction) AND Alignment) NOT (Implant OR Replacement)       |                                                                                                                          |
| 11.             | ("Hallux Valgus" AND (Orthoses OR Orthosis) AND (Design OR Fabrication OR Construction) AND Pain) NOT (Implant OR Replacement)            |                                                                                                                          |
| 12.             | ("Hallux Valgus" AND (Orthoses OR Orthosis) AND (Design OR Fabrication OR Construction) AND "Walking speed") NOT (Implant OR Replacement) |                                                                                                                          |

Figure I PICO question and a list of search strategy

242x90mm (150 x 150 DPI)



Figure II (a) Visualization of main keywords from 148 papers, and (b) Flowchart of study selection procedure

184x296mm (300 x 300 DPI)

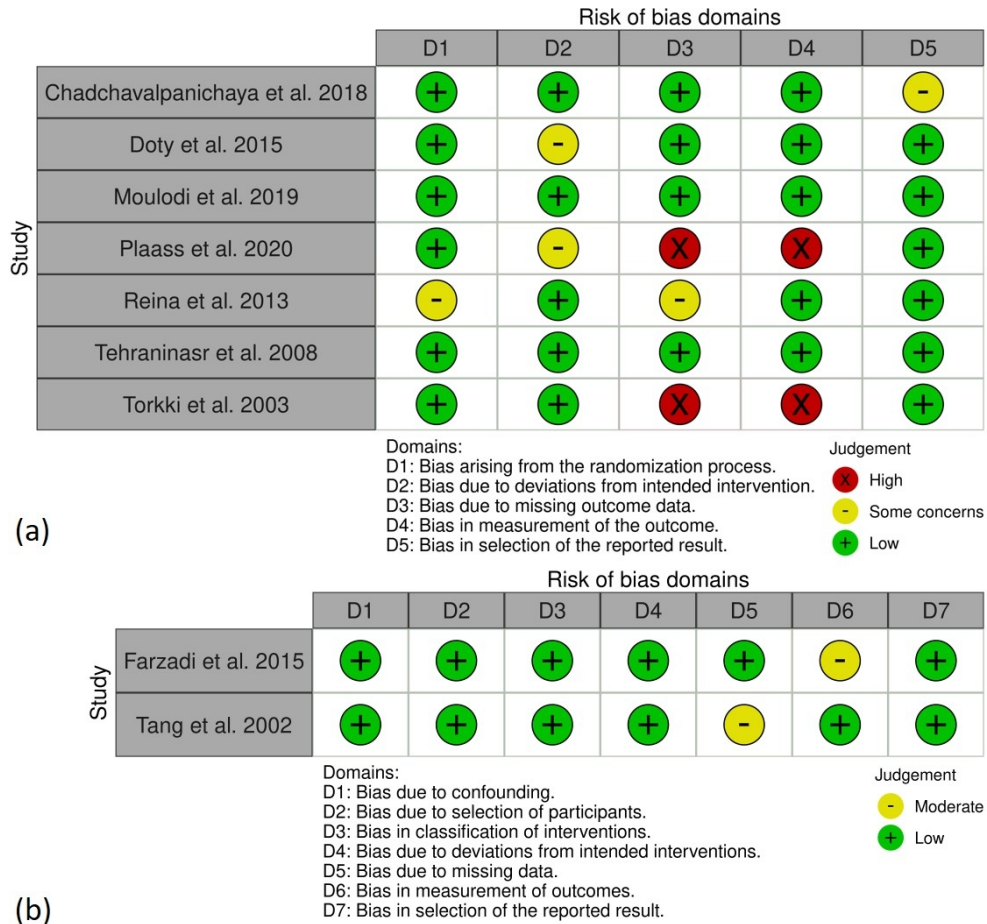

Figure III Risk of bias in included studies (a) risk of bias for randomized studies, (b) risk of bias for non-randomized studies

193x184mm (150 x 150 DPI)

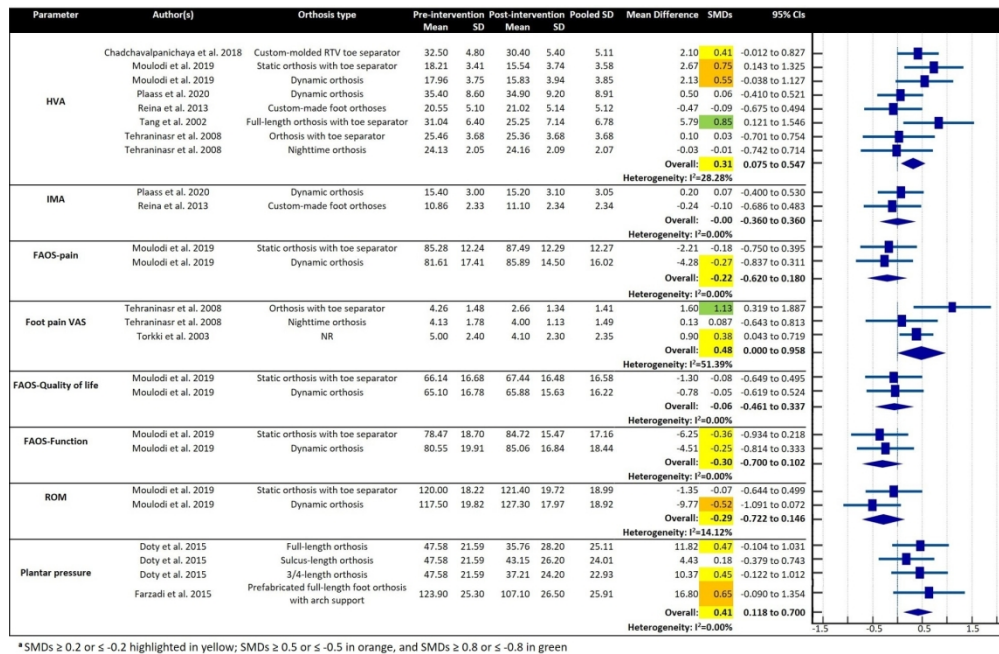

\*SMDs ≥ 0.2 or ≤ -0.2 highlighted in yellow; SMDs ≥ 0.5 or ≤ -0.5 in orange, and SMDs ≥ 0.8 or ≤ -0.8 in green

Figure IV Comparison of observations ^a

338x222mm (150 x 150 DPI)

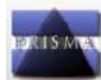

## PRISMA 2020 Checklist

| Section and Topic             | Item # | Checklist item                                                                                                                                                                                                                                                                                       | Location where item is reported |
|-------------------------------|--------|------------------------------------------------------------------------------------------------------------------------------------------------------------------------------------------------------------------------------------------------------------------------------------------------------|---------------------------------|
| <b>TITLE</b>                  |        |                                                                                                                                                                                                                                                                                                      |                                 |
| Title                         | 1      | Identify the report as a systematic review.                                                                                                                                                                                                                                                          | 1                               |
| <b>ABSTRACT</b>               |        |                                                                                                                                                                                                                                                                                                      |                                 |
| Abstract                      | 2      | See the PRISMA 2020 for Abstracts checklist.                                                                                                                                                                                                                                                         | 2                               |
| <b>INTRODUCTION</b>           |        |                                                                                                                                                                                                                                                                                                      |                                 |
| Rationale                     | 3      | Describe the rationale for the review in the context of existing knowledge.                                                                                                                                                                                                                          | 4-5                             |
| Objectives                    | 4      | Provide an explicit statement of the objective(s) or question(s) the review addresses.                                                                                                                                                                                                               | 4-5                             |
| <b>METHODS</b>                |        |                                                                                                                                                                                                                                                                                                      |                                 |
| Eligibility criteria          | 5      | Specify the inclusion and exclusion criteria for the review and how studies were grouped for the syntheses.                                                                                                                                                                                          | 6                               |
| Information sources           | 6      | Specify all databases, registers, websites, organisations, reference lists and other sources searched or consulted to identify studies. Specify the date when each source was last searched or consulted.                                                                                            | 6                               |
| Search strategy               | 7      | Present the full search strategies for all databases, registers and websites, including any filters and limits used.                                                                                                                                                                                 | 6                               |
| Selection process             | 8      | Specify the methods used to decide whether a study met the inclusion criteria of the review, including how many reviewers screened each record and each report retrieved, whether they worked independently, and if applicable, details of automation tools used in the process.                     | 6                               |
| Data collection process       | 9      | Specify the methods used to collect data from reports, including how many reviewers collected data from each report, whether they worked independently, any processes for obtaining or confirming data from study investigators, and if applicable, details of automation tools used in the process. | 6-7                             |
| Data items                    | 10a    | List and define all outcomes for which data were sought. Specify whether all results that were compatible with each outcome domain in each study were sought (e.g. for all measures, time points, analyses), and if not, the methods used to decide which results to collect.                        | 6-7                             |
|                               | 10b    | List and define all other variables for which data were sought (e.g. participant and intervention characteristics, funding sources). Describe any assumptions made about any missing or unclear information.                                                                                         | 6-7                             |
| Study risk of bias assessment | 11     | Specify the methods used to assess risk of bias in the included studies, including details of the tool(s) used, how many reviewers assessed each study and whether they worked independently, and if applicable, details of automation tools used in the process.                                    | 7                               |
| Effect measures               | 12     | Specify for each outcome the effect measure(s) (e.g. risk ratio, mean difference) used in the synthesis or presentation of results.                                                                                                                                                                  | 7                               |
| Synthesis methods             | 13a    | Describe the processes used to decide which studies were eligible for each synthesis (e.g. tabulating the study intervention characteristics and comparing against the planned groups for each synthesis (item #5)).                                                                                 | 6                               |
|                               | 13b    | Describe any methods required to prepare the data for presentation or synthesis, such as handling of missing summary statistics, or data conversions.                                                                                                                                                | 7                               |
|                               | 13c    | Describe any methods used to tabulate or visually display results of individual studies and syntheses.                                                                                                                                                                                               | 7                               |
|                               | 13d    | Describe any methods used to synthesize results and provide a rationale for the choice(s). If meta-analysis was performed, describe the model(s), method(s) to identify the presence and extent of statistical heterogeneity, and software package(s) used.                                          | 7                               |
|                               | 13e    | Describe any methods used to explore possible causes of heterogeneity among study results (e.g. subgroup analysis, meta-regression).                                                                                                                                                                 | 7                               |
|                               | 13f    | Describe any sensitivity analyses conducted to assess robustness of the synthesized results.                                                                                                                                                                                                         | 7                               |
| Reporting bias assessment     | 14     | Describe any methods used to assess risk of bias due to missing results in a synthesis (arising from reporting biases).                                                                                                                                                                              | 6-7                             |
| Certainty                     | 15     | Describe any methods used to assess certainty (or confidence) in the body of evidence for an outcome.                                                                                                                                                                                                | 7                               |

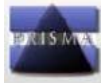

## PRISMA 2020 Checklist

| Section and Topic                              | Item # | Checklist item                                                                                                                                                                                                                                                                       | Location where item is reported |
|------------------------------------------------|--------|--------------------------------------------------------------------------------------------------------------------------------------------------------------------------------------------------------------------------------------------------------------------------------------|---------------------------------|
| assessment                                     |        |                                                                                                                                                                                                                                                                                      |                                 |
| <b>RESULTS</b>                                 |        |                                                                                                                                                                                                                                                                                      |                                 |
| Study selection                                | 16a    | Describe the results of the search and selection process, from the number of records identified in the search to the number of studies included in the review, ideally using a flow diagram.                                                                                         | Figure II                       |
|                                                | 16b    | Cite studies that might appear to meet the inclusion criteria, but which were excluded, and explain why they were excluded.                                                                                                                                                          | Figure II                       |
| Study characteristics                          | 17     | Cite each included study and present its characteristics.                                                                                                                                                                                                                            | Table I                         |
| Risk of bias in studies                        | 18     | Present assessments of risk of bias for each included study.                                                                                                                                                                                                                         | Figure III                      |
| Results of individual studies                  | 19     | For all outcomes, present, for each study: (a) summary statistics for each group (where appropriate) and (b) an effect estimate and its precision (e.g. confidence/credible interval), ideally using structured tables or plots.                                                     | Figure IV                       |
| Results of syntheses                           | 20a    | For each synthesis, briefly summarise the characteristics and risk of bias among contributing studies.                                                                                                                                                                               | 13-14                           |
|                                                | 20b    | Present results of all statistical syntheses conducted. If meta-analysis was done, present for each the summary estimate and its precision (e.g. confidence/credible interval) and measures of statistical heterogeneity. If comparing groups, describe the direction of the effect. | Figure IV                       |
|                                                | 20c    | Present results of all investigations of possible causes of heterogeneity among study results.                                                                                                                                                                                       | 13-14                           |
|                                                | 20d    | Present results of all sensitivity analyses conducted to assess the robustness of the synthesized results.                                                                                                                                                                           | 13-14                           |
| Reporting biases                               | 21     | Present assessments of risk of bias due to missing results (arising from reporting biases) for each synthesis assessed.                                                                                                                                                              | 11                              |
| Certainty of evidence                          | 22     | Present assessments of certainty (or confidence) in the body of evidence for each outcome assessed.                                                                                                                                                                                  | 13-14                           |
| <b>DISCUSSION</b>                              |        |                                                                                                                                                                                                                                                                                      |                                 |
| Discussion                                     | 23a    | Provide a general interpretation of the results in the context of other evidence.                                                                                                                                                                                                    | 15-16                           |
|                                                | 23b    | Discuss any limitations of the evidence included in the review.                                                                                                                                                                                                                      | 17                              |
|                                                | 23c    | Discuss any limitations of the review processes used.                                                                                                                                                                                                                                | 17                              |
|                                                | 23d    | Discuss implications of the results for practice, policy, and future research.                                                                                                                                                                                                       | 17                              |
| <b>OTHER INFORMATION</b>                       |        |                                                                                                                                                                                                                                                                                      |                                 |
| Registration and protocol                      | 24a    | Provide registration information for the review, including register name and registration number, or state that the review was not registered.                                                                                                                                       | 2                               |
|                                                | 24b    | Indicate where the review protocol can be accessed, or state that a protocol was not prepared.                                                                                                                                                                                       | 2                               |
|                                                | 24c    | Describe and explain any amendments to information provided at registration or in the protocol.                                                                                                                                                                                      | 2                               |
| Support                                        | 25     | Describe sources of financial or non-financial support for the review, and the role of the funders or sponsors in the review.                                                                                                                                                        | 17                              |
| Competing interests                            | 26     | Declare any competing interests of review authors.                                                                                                                                                                                                                                   | 17                              |
| Availability of data, code and other materials | 27     | Report which of the following are publicly available and where they can be found: template data collection forms; data extracted from included studies; data used for all analyses; analytic code; any other materials used in the review.                                           | 18                              |



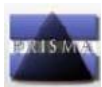

## PRISMA 2020 Checklist

- 1
- 2
- 3
- 4
- 5
- 6
- 7
- 8
- 9
- 10
- 11
- 12
- 13
- 14
- 15
- 16
- 17
- 18
- 19
- 20
- 21
- 22
- 23
- 24
- 25
- 26
- 27
- 28
- 29
- 30
- 31
- 32
- 33
- 34
- 35
- 36
- 37
- 38
- 39
- 40
- 41
- 42
- 43
- 44
- 45
- 46
- 47

10.1136/bmj.n71

For more information, visit: <http://www.prisma-statement.org/>

For peer review only
